# Supplementary material for: Commercially available organolithium compounds as effective, simple precatalysts for silicon–nitrogen heterodehydrocoupling
Source: Royal Society of Chemistry journal article supplement (doi:10.1039/d3dt02564k), 2023-01-01
Supplement: d3dt02564k1.pdf [file d3dt02564k1.pdf]

Supporting Information for:

**Commercially Available Organolithiums as Simple, Effective  
Precatalysts for Silicon–Nitrogen Heterodehydrocoupling**

Matthew B. Reuter, Claire E. Bushey, Diego R. Javier-Jiménez, Rory Waterman\*

*Department of Chemistry, University of Vermont, Burlington, VT 05405-0125*

\*E-mail: [rory.waterman@uvm.edu](mailto:rory.waterman@uvm.edu)

## TABLE OF CONTENTS

|                                                                                                | Page |
|------------------------------------------------------------------------------------------------|------|
| S1. GENERAL AND EXPERIMENTAL INFORMATION.....                                                  | 4    |
| S1.1. General Methods .....                                                                    | 4    |
| S1.2. Abbreviations .....                                                                      | 5    |
| S1.3. Sample Procedure for Titration with <i>N</i> -Benzylbenzamide.....                       | 6    |
| S2. HAMMETT COMPETITION EXPERIMENTS.....                                                       | 7    |
| S2.1. General Information .....                                                                | 7    |
| S2.2. General Procedure for Hammett Competition Experiments .....                              | 7    |
| S2.3. Data Refinement and Analysis .....                                                       | 7    |
| S3. CATALYTIC EXPERIMENTS.....                                                                 | 9    |
| S3.1. General Procedure.....                                                                   | 9    |
| S3.2. PhSiH <sub>3</sub> and 6.0 equiv. of <sup>n</sup> PrNH <sub>2</sub> .....                | 10   |
| S3.3. PhSiH <sub>3</sub> and 6.0 equiv. of <sup>i</sup> PrNH <sub>2</sub> .....                | 12   |
| S5.4. PhSiH <sub>3</sub> and 6.0 equiv. of <sup>t</sup> BuNH <sub>2</sub> .....                | 14   |
| S5.5. PhSiH <sub>3</sub> and 6.0 equiv. PhNH <sub>2</sub> .....                                | 16   |
| S5.6. PhSiH <sub>3</sub> and 6.0 equiv. of PyNH .....                                          | 19   |
| S5.7. PhSiH <sub>3</sub> and 6.0 equiv. of Et <sub>2</sub> NH.....                             | 20   |
| S5.8. PhMeSiH <sub>2</sub> and 4.0 equiv. of <sup>n</sup> PrNH <sub>2</sub> .....              | 23   |
| S5.9. PhMeSiH <sub>2</sub> and 4.0 equiv. of <sup>i</sup> PrNH <sub>2</sub> .....              | 25   |
| S5.10. PhMeSiH <sub>2</sub> and 4.0 equiv. of <sup>t</sup> BuNH <sub>2</sub> .....             | 27   |
| S5.11. PhMeSiH <sub>2</sub> and 4.0 equiv. of PhNH <sub>2</sub> .....                          | 29   |
| S5.12. PhMeSiH <sub>2</sub> and 4.0 equiv. of PyNH .....                                       | 31   |
| S5.13. PhMeSiH <sub>2</sub> and 4.0 equiv. of Et <sub>2</sub> NH .....                         | 32   |
| S5.14. Ph <sub>2</sub> SiH <sub>2</sub> and 4.0 equiv. of <sup>n</sup> PrNH <sub>2</sub> ..... | 34   |
| S5.15. Ph <sub>2</sub> SiH <sub>2</sub> and 4.0 equiv. of <sup>i</sup> PrNH <sub>2</sub> ..... | 36   |
| S5.16. Ph <sub>2</sub> SiH <sub>2</sub> and 4.0 equiv. of <sup>t</sup> BuNH <sub>2</sub> ..... | 38   |
| S5.17. Ph <sub>2</sub> SiH <sub>2</sub> and 4.0 equiv. of PhNH <sub>2</sub> .....              | 41   |
| S5.18. Ph <sub>2</sub> SiH <sub>2</sub> and 4.0 equiv. of PyNH.....                            | 44   |
| S5.19. Ph <sub>2</sub> SiH <sub>2</sub> and 4.0 equiv. of Et <sub>2</sub> NH.....              | 45   |
| S5.20. PhMe <sub>2</sub> SiH and 2.0 equiv. of <sup>n</sup> PrNH <sub>2</sub> .....            | 47   |
| S5.21. PhMe <sub>2</sub> SiH and 2.0 equiv. of <sup>i</sup> PrNH <sub>2</sub> .....            | 48   |

|                                                                                                                                               |     |
|-----------------------------------------------------------------------------------------------------------------------------------------------|-----|
| S5.22. PhMe <sub>2</sub> SiH and 2.0 equiv. of PhNH <sub>2</sub> .....                                                                        | 50  |
| S5.26. Ph <sub>2</sub> MeSiH and 2.0 equiv. of Et <sub>2</sub> NH.....                                                                        | 53  |
| S5.27. Ph <sub>3</sub> SiH and 2.0 equiv. of <sup>t</sup> PrNH <sub>2</sub> .....                                                             | 55  |
| S5.28. Ph <sub>3</sub> SiH and 2.0 equiv. of <sup>t</sup> PrNH <sub>2</sub> .....                                                             | 57  |
| S5.29. Ph <sub>3</sub> SiH and 2.0 equiv. of <sup>t</sup> BuNH <sub>2</sub> .....                                                             | 59  |
| S5.30. Ph <sub>3</sub> SiH and 2.0 equiv. of <sup>t</sup> BuNH <sub>2</sub> .....                                                             | 61  |
| S5.31. Ph <sub>3</sub> SiH and 2.0 equiv. of <sup>t</sup> PeNH <sub>2</sub> .....                                                             | 62  |
| S5.32. Ph <sub>3</sub> SiH and 2.0 equiv. of <sup>t</sup> HeNH <sub>2</sub> .....                                                             | 64  |
| S5.33. Ph <sub>3</sub> SiH and 2.0 equiv. of PhNH <sub>2</sub> .....                                                                          | 66  |
| S5.34. Ph <sub>3</sub> SiH and 2.0 equiv. of PyNH.....                                                                                        | 67  |
| S5.35. Ph <sub>3</sub> SiH and 2.0 equiv. of Et <sub>2</sub> NH.....                                                                          | 69  |
| S5.36. ( <i>p</i> -MeO-C <sub>6</sub> H <sub>4</sub> )Ph <sub>2</sub> SiH and 2.0 equiv. of <sup>t</sup> BuNH <sub>2</sub> .....              | 70  |
| S5.37. ( <i>p</i> -Me-C <sub>6</sub> H <sub>4</sub> )Ph <sub>2</sub> SiH and 2.0 equiv. of <sup>t</sup> BuNH <sub>2</sub> .....               | 71  |
| S5.38. ( <i>p</i> -F <sub>3</sub> C-C <sub>6</sub> H <sub>4</sub> )Ph <sub>2</sub> SiH and 2.0 equiv. of <sup>t</sup> BuNH <sub>2</sub> ..... | 73  |
| S5.39. Et <sub>3</sub> SiH and 2.0 equiv. of PyNH.....                                                                                        | 74  |
| S4. EPR ACQUISITION.....                                                                                                                      | 76  |
| S4.1. General Procedure.....                                                                                                                  | 76  |
| S4.2. EPR Spectrum.....                                                                                                                       | 76  |
| S5. WORKUP AND CHARACTERIZATION DETAILS.....                                                                                                  | 77  |
| S5.1. General Workup for Isolating Aminosilanes.....                                                                                          | 77  |
| S5.2. PhSi(NPy) <sub>3</sub> .....                                                                                                            | 78  |
| S5.3. ( <i>p</i> -MeO-C <sub>6</sub> H <sub>4</sub> )Ph <sub>2</sub> Si(NH <sup>t</sup> Bu).....                                              | 88  |
| S5.4. ( <i>p</i> -Me-C <sub>6</sub> H <sub>4</sub> )Ph <sub>2</sub> Si(NH <sup>t</sup> Bu).....                                               | 93  |
| S5.5. ( <i>p</i> -F <sub>3</sub> C-C <sub>6</sub> H <sub>4</sub> )Ph <sub>2</sub> Si(NH <sup>t</sup> Bu).....                                 | 98  |
| S5.6. Ph <sub>3</sub> Si(NEt <sub>2</sub> ).....                                                                                              | 104 |
| S6. REFERENCES.....                                                                                                                           | 109 |

## S1. General and Experimental Information

### S1.1. General Methods

All manipulations were conducted under a positive pressure of N<sub>2</sub> in either an M. Braun glovebox or using standard Schlenk techniques. Dry, oxygen-free solvents, reagents, and solid support were used throughout experimentation and stored inside the glovebox. Solvents such as *n*-pentane, hexanes, and toluene were degassed with argon, dried by passing through columns of alumina and Q5, and subsequently stored over 3Å molecular sieves. Tetrahydrofuran (THF) was dried over Na/benzophenone, and subsequently distilled and stored in a 1 L PTFE-sealed Strauss flask. Benzene-*d*<sub>6</sub> (C<sub>6</sub>D<sub>6</sub>) was distilled from CaH<sub>2</sub> and stored over activated 3Å molecular sieves for at least 48 h prior to use. Celite and 3Å molecular sieves were dried between 180-200°C under dynamic vacuum for at least 1 d.

Organolithium reagents were obtained from chemical vendors as solutions: methyl lithium (MeLi) in 1,2-dimethoxyethane, ethyl lithium (EtLi) in dibutyl ether, trimethylsilylmethyl lithium (Me<sub>3</sub>SiCH<sub>2</sub>Li) in hexanes, *normal*-butyl lithium (<sup>*n*</sup>BuLi) in hexanes, *secondary*-butyl lithium (<sup>*s*</sup>BuLi) in cyclohexane, *tertiary*-butyl lithium (<sup>*t*</sup>BuLi) in pentane, and phenyl lithium (PhLi) in dibutyl ether. For catalysis, these reagents were filtered through Celite inside the glovebox, titrated thrice with *N*-benzylbenzamide in 2-3 mL of THF (Section S1.3., *vide infra*), and stored at -40°C prior to use. Me<sub>3</sub>SiCH<sub>2</sub>Li was isolated as a solid by filtering the received hexanes solution through Celite inside the glovebox and recrystallizing from a saturated solution at -40°C. Amines were distilled under dynamic N<sub>2</sub> from CaH<sub>2</sub> and stored over 3Å molecular sieves. PhSiH<sub>3</sub> and PhMeSiH<sub>2</sub> were distilled under dynamic N<sub>2</sub> and stored over 3Å molecular sieves. Ph<sub>2</sub>SiH<sub>2</sub> was distilled under dynamic vacuum and stored over 3Å molecular sieves. PhMe<sub>2</sub>SiH and Ph<sub>2</sub>MeSiH were received, transferred to the glovebox, and stored over 3Å molecular sieves. Ph<sub>3</sub>SiH was recrystallized from hexanes at -40°C. Hexamethylbenzene (C<sub>6</sub>Me<sub>6</sub>) was sublimed at 150 °C under dynamic vacuum. Reagents such as tertiary

silanes (*p*-X-C<sub>6</sub>H<sub>4</sub>)Ph<sub>2</sub>SiH for Hammett competition experiments were synthesized and purified by literature methods.<sup>1</sup>

Glassware was cleaned by sequential washings of base (5% KOH/10% *t*PrOH/85% H<sub>2</sub>O), acid (10% HNO<sub>3</sub>/90% H<sub>2</sub>O), and deionized water. Glassware was oven dried at 140 °C for at least 1 h, which was either transferred to the antechamber of an M. Braun glovebox or placed under dynamic vacuum connected to a Schlenk line. Catalytic reactions were conducted in PTFE-sealed J-Young NMR tubes, which were cleaned and dried by the methods mentioned above.

Nuclear magnetic resonance (NMR) spectra were recorded at ambient temperature on a Bruker AXR 500 MHz spectrometer. Electron paramagnetic resonance (EPR) measurements were collected at ambient temperature on a Bruker EMXplus Spectrometer.

## S1.2. Abbreviations

**Table S1. Common and Uncommon Abbreviations and their Associated Indicators**

| Abbreviation    | Full Name (Formula)                                                              | Abbreviation    | Full Name (Formula)                                                               |
|-----------------|----------------------------------------------------------------------------------|-----------------|-----------------------------------------------------------------------------------|
| Me              | Methyl ( $\alpha'$ -CH <sub>3</sub> )                                            | <sup>s</sup> Bu | <i>s</i> -Butyl [ $\alpha'$ -CH(Et)(Me)]                                          |
| Et              | Ethyl ( $\alpha'$ -CH <sub>2</sub> Me)                                           | <sup>t</sup> Bu | <i>t</i> -Butyl [ $\alpha'$ -C(Me) <sub>3</sub> ]                                 |
| <sup>n</sup> Pr | <i>n</i> -Propyl ( $\alpha'$ -CH <sub>2</sub> CH <sub>2</sub> Me)                | <sup>n</sup> Pe | <i>n</i> -Pentyl [ $\alpha'$ -CH <sub>2</sub> (CH <sub>2</sub> ) <sub>3</sub> Me] |
| <sup>i</sup> Pr | <i>i</i> -Propyl [ $\alpha'$ -CH(Me) <sub>2</sub> ]                              | <sup>n</sup> He | <i>n</i> -Hexyl [ $\alpha'$ -CH <sub>2</sub> (CH <sub>2</sub> ) <sub>4</sub> Me]  |
| <sup>n</sup> Bu | <i>n</i> -Butyl [ $\alpha'$ -CH <sub>2</sub> (CH <sub>2</sub> ) <sub>2</sub> Me] | Ph              | Phenyl ( $\eta'$ -C <sub>6</sub> H <sub>5</sub> )                                 |
| <sup>i</sup> Bu | <i>i</i> -Butyl [ $\alpha'$ -CH <sub>2</sub> CH(Me) <sub>2</sub> ]               | NPy             | Pyrrolidine ( $\eta'$ -NC <sub>4</sub> H <sub>8</sub> )                           |

### S1.3. Sample Procedure for Titration with *N*-Benzylbenzamide

In the glovebox, *N*-Benzylbenzamide was added to a 20 mL glass scintillation vial equipped with a microstir bar and dissolved in 2-3 mL of THF. RLi was slowly added via a 1 mL syringe until the solution turned a consistent dark purple. The molarity of RLi was found using Eq. 1. These reactions were run in triplicate.

$$M = \frac{\text{moles of } N\text{-Benzylbenzamide}}{L \text{ of added RLi}} \quad (1)$$

Table S2. Titration results for lithiated reagents

| Entry | RLi                               | <i>M</i> from Vendor | <i>M</i> after Filtration |
|-------|-----------------------------------|----------------------|---------------------------|
| 1     | Me                                | 3.10                 | 2.80                      |
| 2     | Et                                | 1.70                 | 1.50                      |
| 3     | Me <sub>3</sub> SiCH <sub>2</sub> | 0.70                 | --- <sup>[a]</sup>        |
| 4     | <sup>n</sup> Bu                   | 2.40                 | 2.50 <sup>[b]</sup>       |
| 5     | <sup>t</sup> Bu                   | 1.30                 | 1.40 <sup>[b]</sup>       |
| 6     | <sup>i</sup> Bu                   | 1.60                 | 1.50                      |
| 7     | Ph                                | 2.00                 | 1.70                      |

<sup>[a]</sup>Isolated as a solid (*vide supra*). <sup>[b]</sup>The increased *M* of these solutions is attributed to the loss of stock solution solvent under dynamic vacuum during filtration.

## S2. Hammett Competition Experiments

### S2.1. General Information

Stock solutions of (*p*-X-C<sub>6</sub>H<sub>4</sub>)Ph<sub>2</sub>SiH (X = CF<sub>3</sub>, H, Me, OMe) were prepared inside the glovebox to a concentration of 1.0 M in benzene-*d*<sub>6</sub>. These solutions were stored at -40 °C and unfrozen only immediately prior to the start of experimentation.

### S2.2. General Procedure for Hammett Competition Experiments

In the glovebox, Ph<sub>3</sub>SiH (188.5 μL, 1.8 × 10<sup>-1</sup> mmol, 1.0 M in benzene-*d*<sub>6</sub>), (*p*-X-C<sub>6</sub>H<sub>4</sub>)Ph<sub>2</sub>SiH (188.5 μL, 1.8 × 10<sup>-1</sup> mmol, 1.0 M in benzene-*d*<sub>6</sub>), C<sub>6</sub>Me<sub>6</sub> (52.5 μL, 0.4 M in benzene-*d*<sub>6</sub>) and <sup>t</sup>BuNH<sub>2</sub> (79.5 μL, 7.5 × 10<sup>-1</sup> mmol) were added to 0.5 mL of benzene-*d*<sub>6</sub> in a 20 mL glass scintillation. After the addition of **1** (14.5 μL, 3.7 × 10<sup>-2</sup> mmol, 11.1 mol %, 2.9 M in hexanes), the effervescent solution was quickly transferred to a PTFE-sealed J-Young NMR tube via a glass pipette. The solution was allowed to react for 1 h at ambient temperature before <sup>1</sup>H NMR spectra were acquired. These reactions were run in triplicate.

### S2.3. Data Refinement and Analysis

Spectra were referenced to an internal standard of C<sub>6</sub>Me<sub>6</sub> (i.e., δ = 2.13). Integrations were determined from diagnostic <sup>t</sup>Bu peaks, with Ph<sub>3</sub>Si(NH<sup>t</sup>Bu) normalized to 1.00. The full listing of raw and refined data is presented in Table S2.1, where red values indicate omitted data points. Logarithmic mean values of  $k_H/k_D$  were plotted against the substituent constant for the corresponding *p*-substituted silane, which were obtained from the literature.<sup>2</sup>

Table S2.1. Data for Hammett analysis between Ph<sub>3</sub>SiH and (*p*-X-C<sub>6</sub>H<sub>4</sub>)Ph<sub>2</sub>SiH

| X               | Hammett<br>Parameter | k <sub>X</sub> /k <sub>H</sub> |      |      | log(k <sub>X</sub> /k <sub>H</sub> ) |       |       |       |      |
|-----------------|----------------------|--------------------------------|------|------|--------------------------------------|-------|-------|-------|------|
|                 |                      | 1                              | 2    | 3    | 1                                    | 2     | 3     | Mean  | σ    |
| CF <sub>3</sub> | 0.54                 | 2.89                           | 3.60 | 3.49 | 0.45                                 | 0.56  | 0.54  | 1.10  | 0.01 |
| H               | 0.00                 | 1.00                           | 1.00 | 1.00 | 0.00                                 | 0.00  | 0.00  | 0.00  | 0.00 |
| Me              | -0.17                | 0.98                           | 0.99 | 0.99 | -0.01                                | 0.00  | 0.00  | -0.02 | 0.00 |
| OMe             | -0.27                | 0.81                           | 0.83 | 0.85 | -0.09                                | -0.08 | -0.07 | -0.24 | 0.01 |



## S3. Catalytic Experiments

### S3.1. General Procedure

In an M. Braun glovebox, a 20 mL scintillation vial was charged with 0.5 mL of benzene- $d_6$ , followed by silane, amine, and **1**. The vigorously bubbling solution was quickly transferred to a PTFE-sealed J-Young NMR tube via glass pipette and left to react at ambient temperature for 1 h, unless otherwise specified.

Table 3.1. List of icons and identifiers

| Icon | Meaning                 | Note(s)                            |
|------|-------------------------|------------------------------------|
| ●    | Aminosilane             | Desired Product                    |
| ■    | Silane                  | Reagent                            |
| ◆    | Hydrogen Gas            | By-product                         |
| ▲    | $C_6Me_6$               | Internal Standard                  |
| ▼    | Benzene- $d_6$          | Solvent (i.e., residual $C_6H_6$ ) |
| ‡    | Borosilicate Glass Peak | From NMR tube                      |

### S3.2. PhSiH<sub>3</sub> and 6.0 equiv. of <sup>n</sup>PrNH<sub>2</sub>

PhSiH<sub>3</sub> (46.5 μL, 3.7 × 10<sup>-1</sup> mmol), <sup>n</sup>PrNH<sub>2</sub> (186.0 μL, 22.6 × 10<sup>-1</sup> mmol, 6.0 equiv.), and **1** (14.5 μL, 3.7 × 10<sup>-2</sup> mmol, 2.6 M in hexanes, 10.0 mol %) were reacted together in 0.5 mL of benzene-*d*<sub>6</sub> in the presence of C<sub>6</sub>Me<sub>6</sub> standard (52.5 μL, 0.4 M in benzene-*d*<sub>6</sub>). Complete consumption of PhSiH<sub>3</sub> was observed after 1 h, as determined by the absence of the SiH peak at δ = 4.22 in the <sup>1</sup>H NMR spectrum. The appearance of a diagnostic peak at δ = 2.82 in the <sup>1</sup>H NMR spectrum indicated 66% conversion to PhSi(NH<sup>n</sup>Pr)<sub>3</sub> after 1 h at ambient temperature. Additional peaks contributed to the lowered conversion. Spectra were consistent with previous reports of this compound.<sup>3</sup>

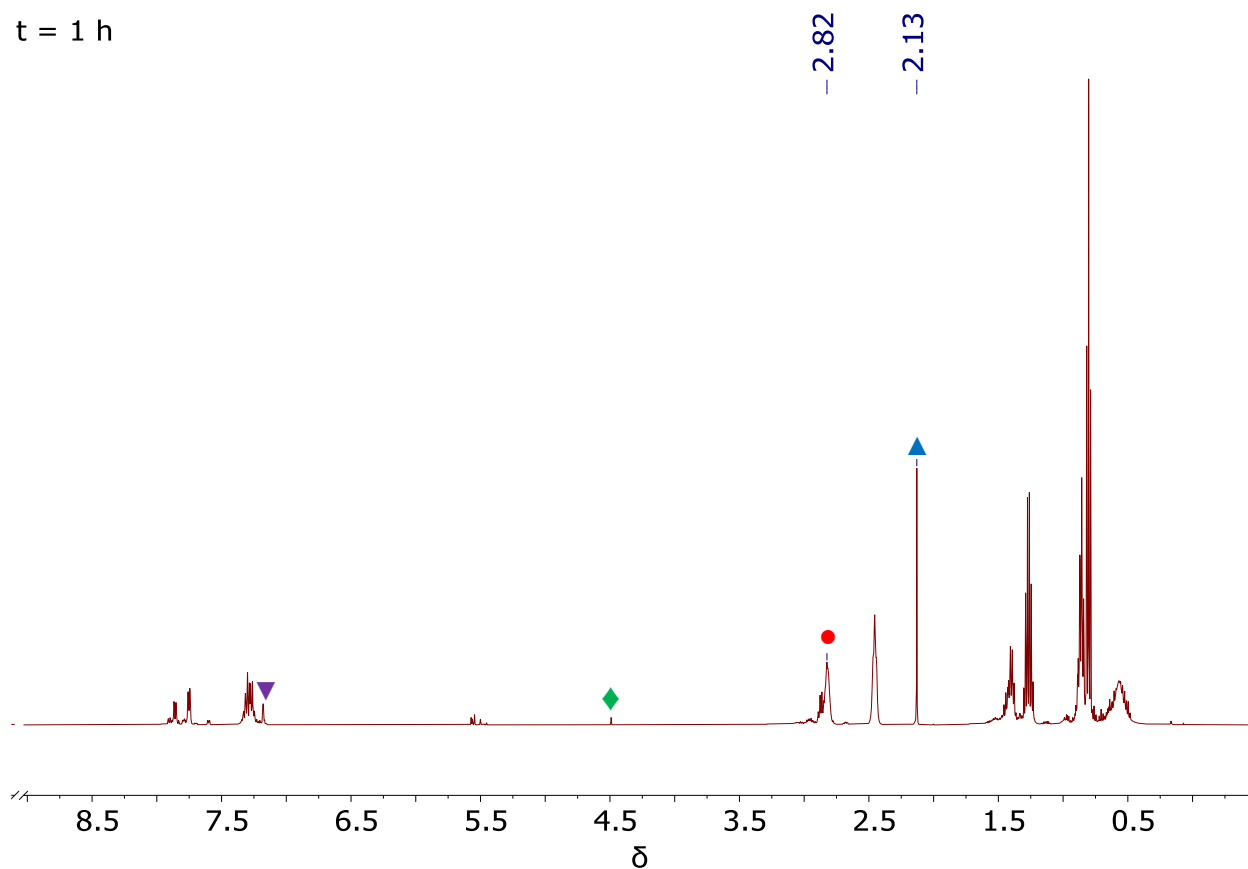

**Figure S3.1.** <sup>1</sup>H NMR spectrum of the reaction between PhSiH<sub>3</sub> and <sup>n</sup>PrNH<sub>2</sub> catalyzed by **1** in benzene-*d*<sub>6</sub> after 1 h.

t = 24 h

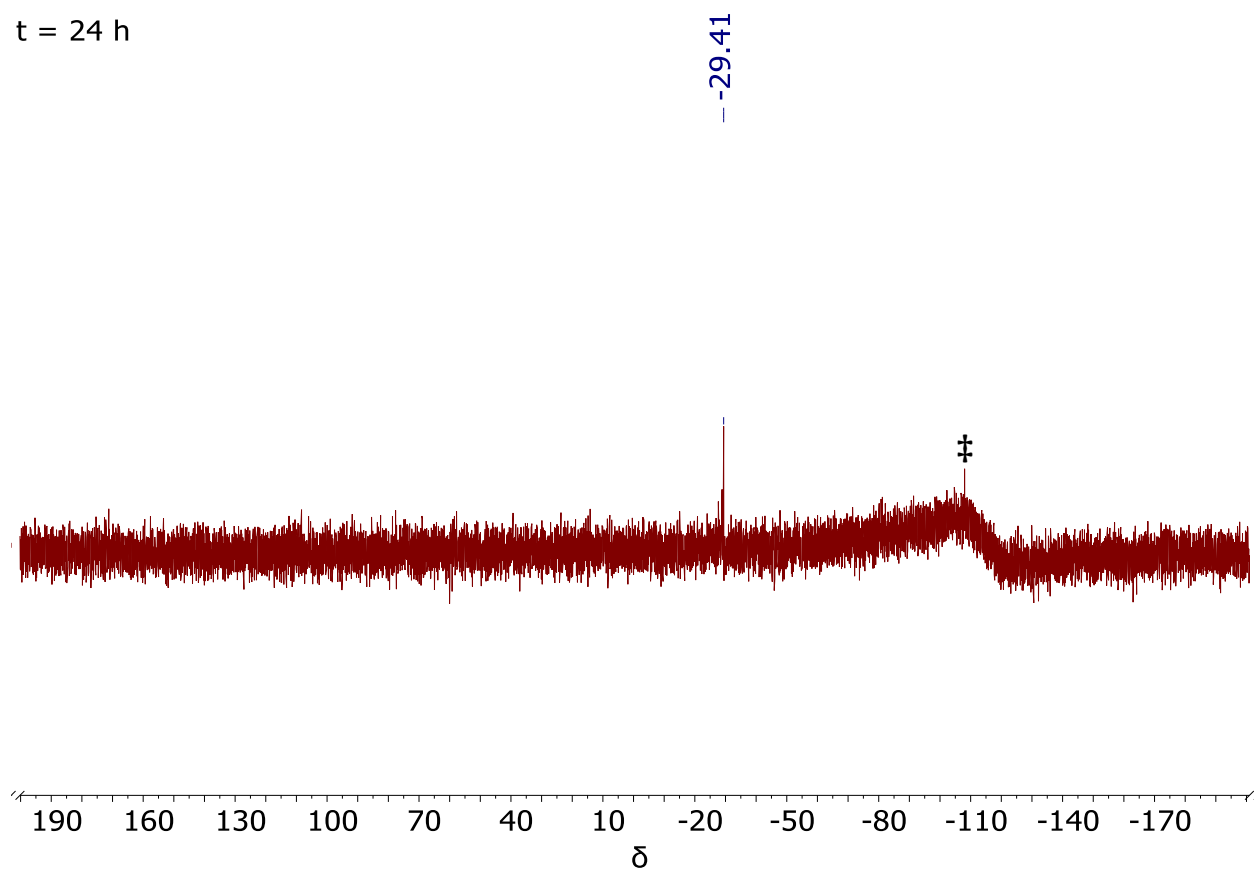

**Figure S3.2.**  $^{29}\text{Si}\{^1\text{H}\}$  NMR spectrum of the reaction between  $\text{PhSiH}_3$  and  $^n\text{PrNH}_2$  catalyzed by **1** in benzene- $d_6$  after 24 h.

### S3.3. PhSiH<sub>3</sub> and 6.0 equiv. of <sup>t</sup>PrNH<sub>2</sub>

PhSiH<sub>3</sub> (46.5 μL, 3.7 × 10<sup>-1</sup> mmol), <sup>t</sup>PrNH<sub>2</sub> (194.0 μL, 22.6 × 10<sup>-1</sup> mmol, 6.0 equiv.), and **1** (14.5 μL, 3.7 × 10<sup>-2</sup> mmol, 2.6 M in hexanes, 10.0 mol %) were reacted together in 0.5 mL of benzene-*d*<sub>6</sub> in the presence of C<sub>6</sub>Me<sub>6</sub> standard (52.5 μL, 0.4 M in benzene-*d*<sub>6</sub>). Complete consumption of PhSiH<sub>3</sub> was observed after 1 h. The appearance of a diagnostic septet centered at δ = 3.24 in the <sup>1</sup>H NMR spectrum indicated 85% conversion to PhSi(NH<sup>t</sup>Pr)<sub>3</sub> after 1 h at ambient temperature. The appearance of additional <sup>t</sup>Pr peaks, which are likely oligomeric products, contributed to the lowered conversion. Spectra were consistent with previous reports of this compound.<sup>4</sup>

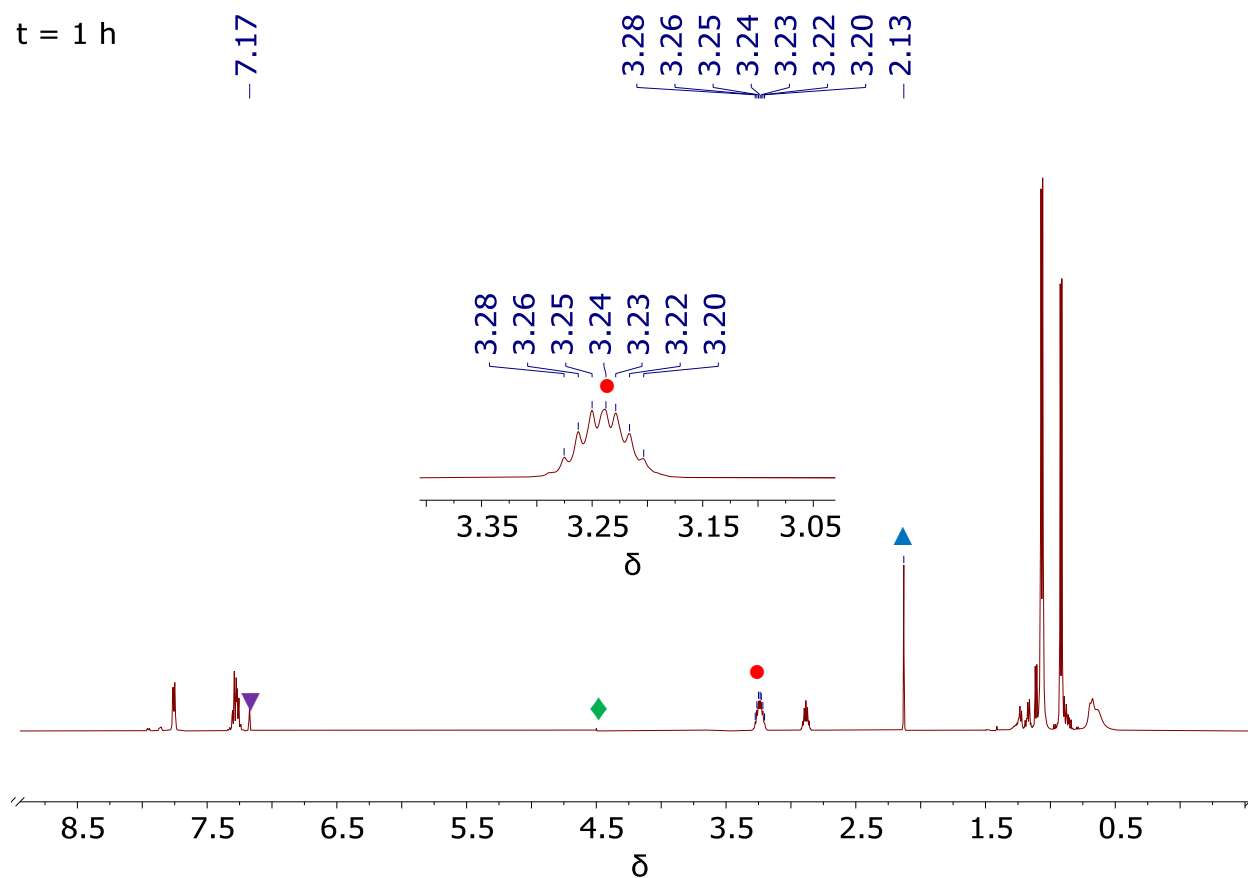

**Figure S3.3.** <sup>1</sup>H NMR spectrum of the reaction between PhSiH<sub>3</sub> and <sup>t</sup>PrNH<sub>2</sub> catalyzed by **1** in benzene-*d*<sub>6</sub> after 1 h.

t = 1 h

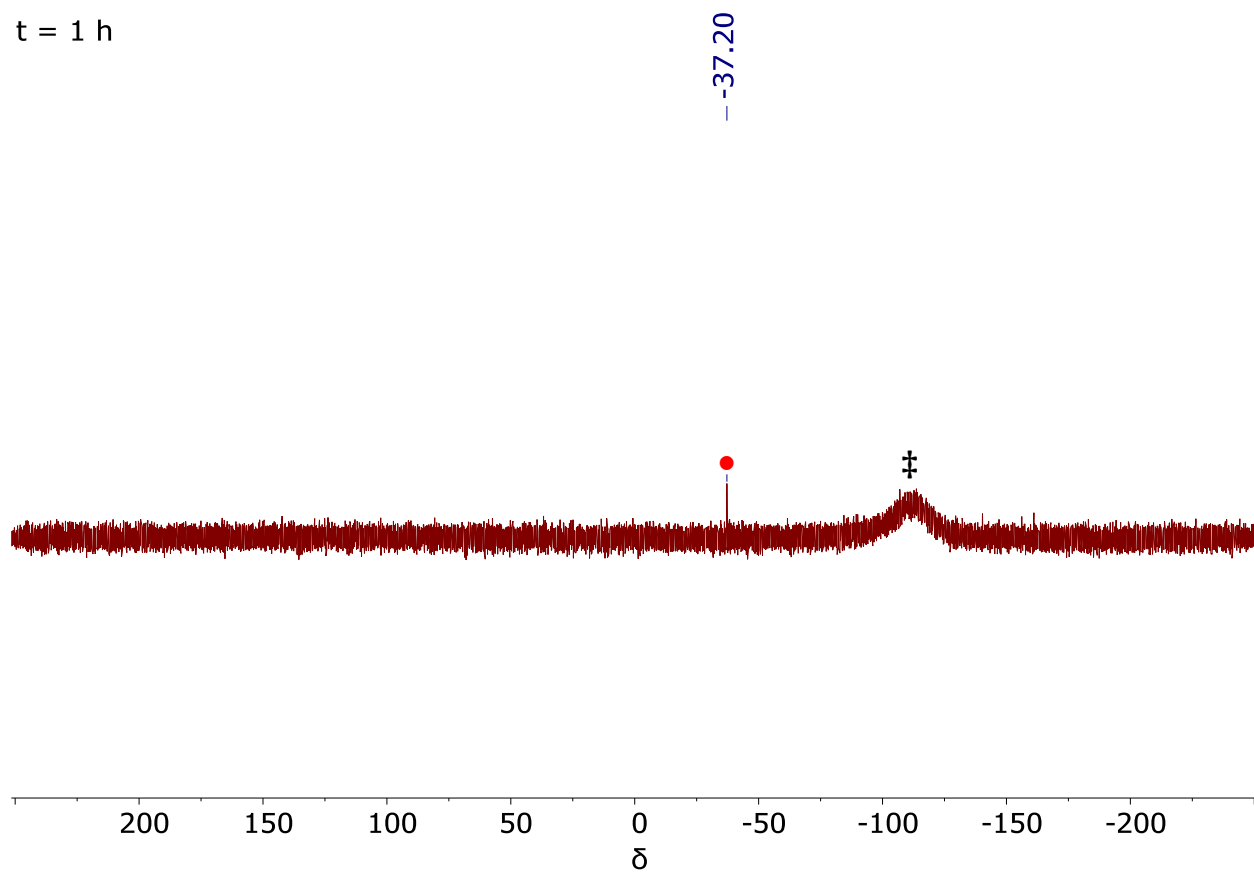

**Figure S3.4.**  $^{29}\text{Si}\{^1\text{H}\}$  NMR spectrum of the reaction between  $\text{PhSiH}_3$  and  $^i\text{PrNH}_2$  catalyzed by **1** in benzene- $d_6$  after 1 h.

#### S5.4. PhSiH<sub>3</sub> and 6.0 equiv. of <sup>t</sup>BuNH<sub>2</sub>

PhSiH<sub>3</sub> (46.5 μL, 3.7 × 10<sup>-1</sup> mmol), <sup>t</sup>BuNH<sub>2</sub> (238.0 μL, 22.6 × 10<sup>-1</sup> mmol, 6.0 equiv.), and **1** (14.5 μL, 3.7 × 10<sup>-2</sup> mmol, 2.6 M in hexanes, 10.0 mol %) were reacted together in 0.5 mL of benzene-*d*<sub>6</sub>. Complete consumption of PhSiH<sub>3</sub> was observed after 1 h. The appearance of a diagnostic triplet centered at δ = 5.41 in the <sup>1</sup>H NMR spectrum indicated 98% conversion to PhSiH(NH<sup>t</sup>Bu)<sub>2</sub> after 1 h at ambient temperature. An additional peak in the <sup>1</sup>H-<sup>29</sup>Si{<sup>1</sup>H} NMR HSQC spectrum was observed, which was not consistent with PhSiH<sub>2</sub>NH<sup>t</sup>Bu,<sup>3</sup> (PhSiH<sub>2</sub>)<sub>2</sub>N<sup>t</sup>Bu,<sup>4</sup> or [PhHSi-μ-(N<sup>t</sup>Bu)]<sub>2</sub>.<sup>5</sup> Spectra were consistent with previous reports of this compound.<sup>3,6</sup>

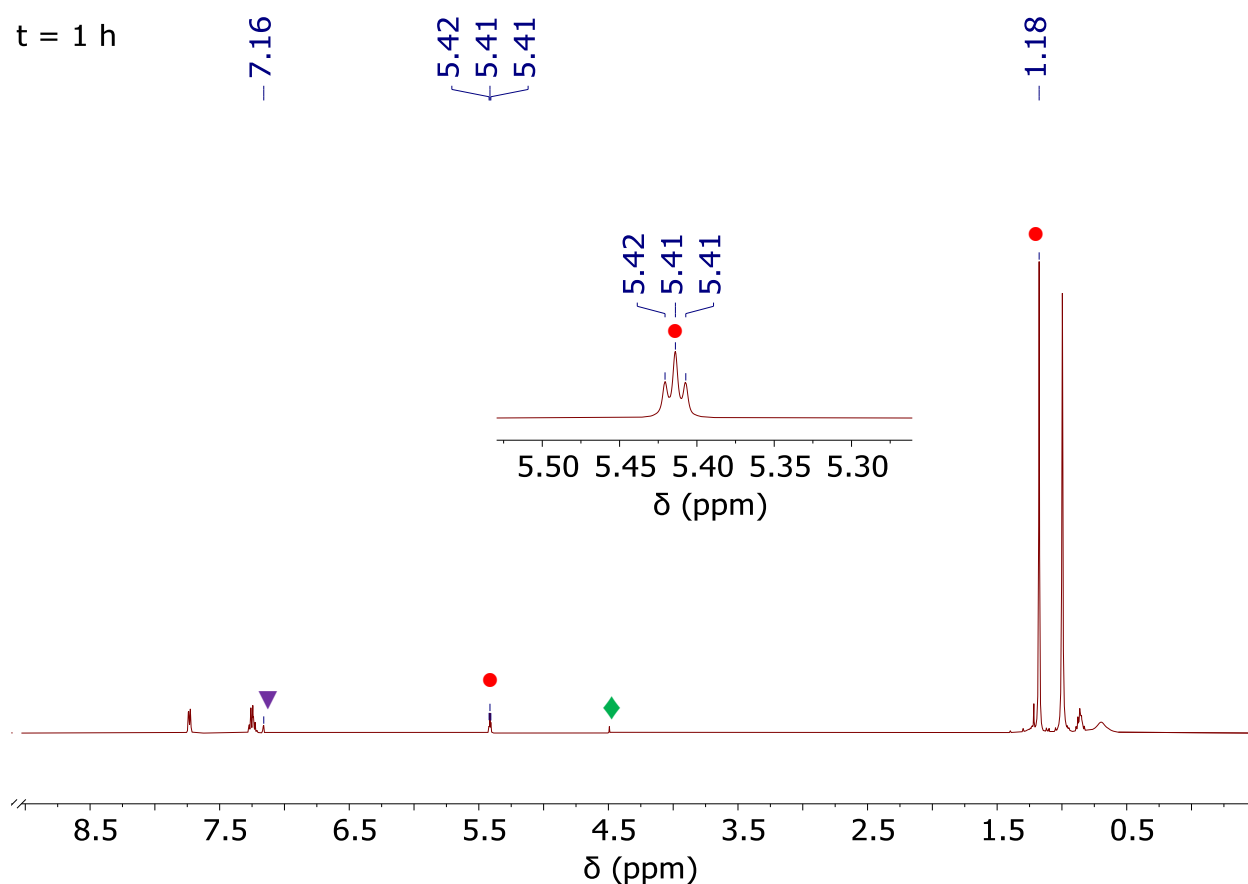

**Figure S3.5.** <sup>1</sup>H NMR spectrum of the reaction between PhSiH<sub>3</sub> and <sup>t</sup>BuNH<sub>2</sub> catalyzed by **1** in benzene-*d*<sub>6</sub> after 1 h.

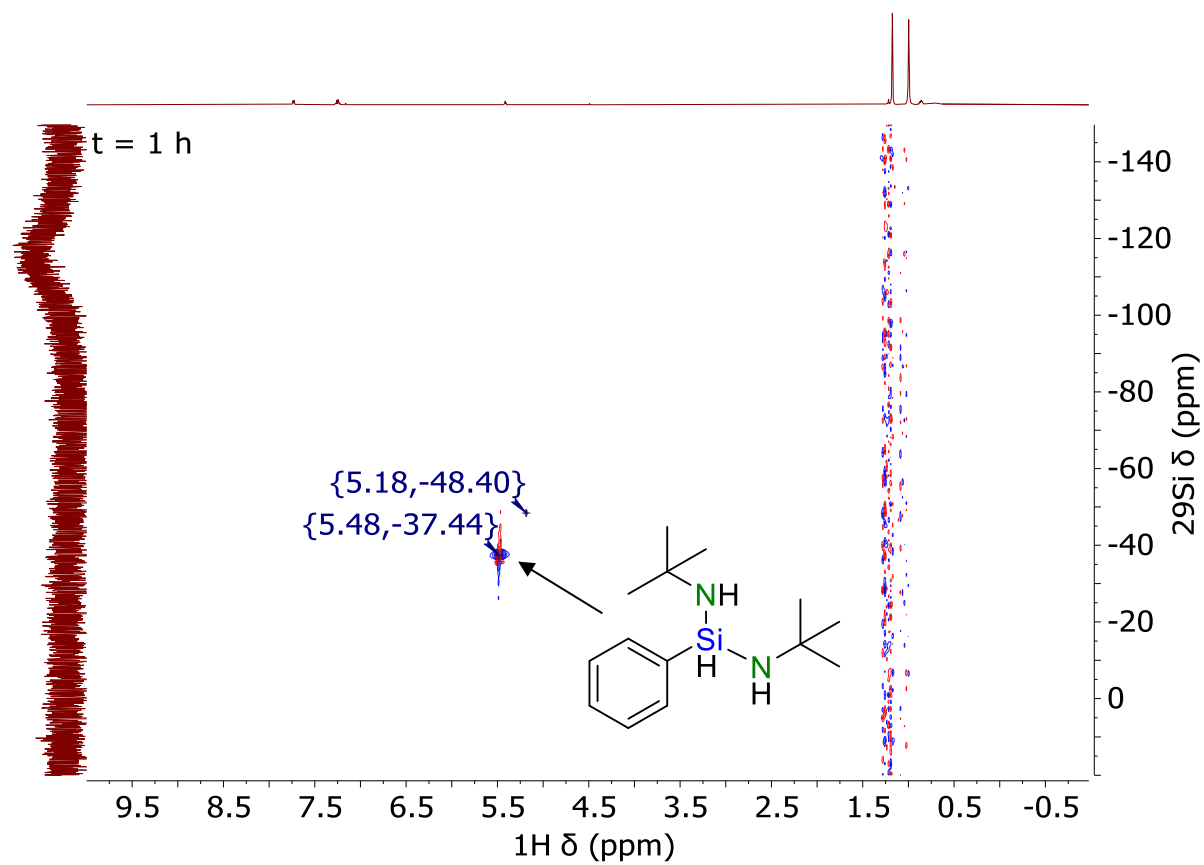

**Figure S3.6.**  $^1\text{H}$ - $^{29}\text{Si}\{^1\text{H}\}$  HSQC NMR spectrum of the reaction between  $\text{PhSiH}_3$  and  $t\text{BuNH}_2$  catalyzed by **1** in benzene- $d_6$  after 1 h.

### S5.5. PhSiH<sub>3</sub> and 6.0 equiv. PhNH<sub>2</sub>

PhSiH<sub>3</sub> (46.5  $\mu$ L,  $3.7 \times 10^{-1}$  mmol), PhNH<sub>2</sub> (204.5  $\mu$ L,  $22.6 \times 10^{-1}$  mmol, 6.0 equiv.), and **1** (16.5  $\mu$ L,  $3.7 \times 10^{-2}$  mmol, 2.3 M in hexanes, 10.0 mol %) were reacted together in 0.5 mL of benzene-*d*<sub>6</sub>. Complete consumption of PhSiH<sub>3</sub> was observed after 1 h. The bis- and tris(aminosilane) products PhSiH(NHPh)<sub>2</sub> and PhSi(NHPh)<sub>3</sub> were formed in approximately 90% and 10% conversion, respectively. A peak at  $\delta = -40.43$  in the <sup>1</sup>H-<sup>29</sup>Si{<sup>1</sup>H} HSQC NMR spectrum, which is indistinguishable in the <sup>1</sup>H NMR spectrum, may be consistent with residual PhSiH<sub>2</sub>(NHPh). Spectra were consistent with previous reports of these compounds.<sup>6,7</sup>

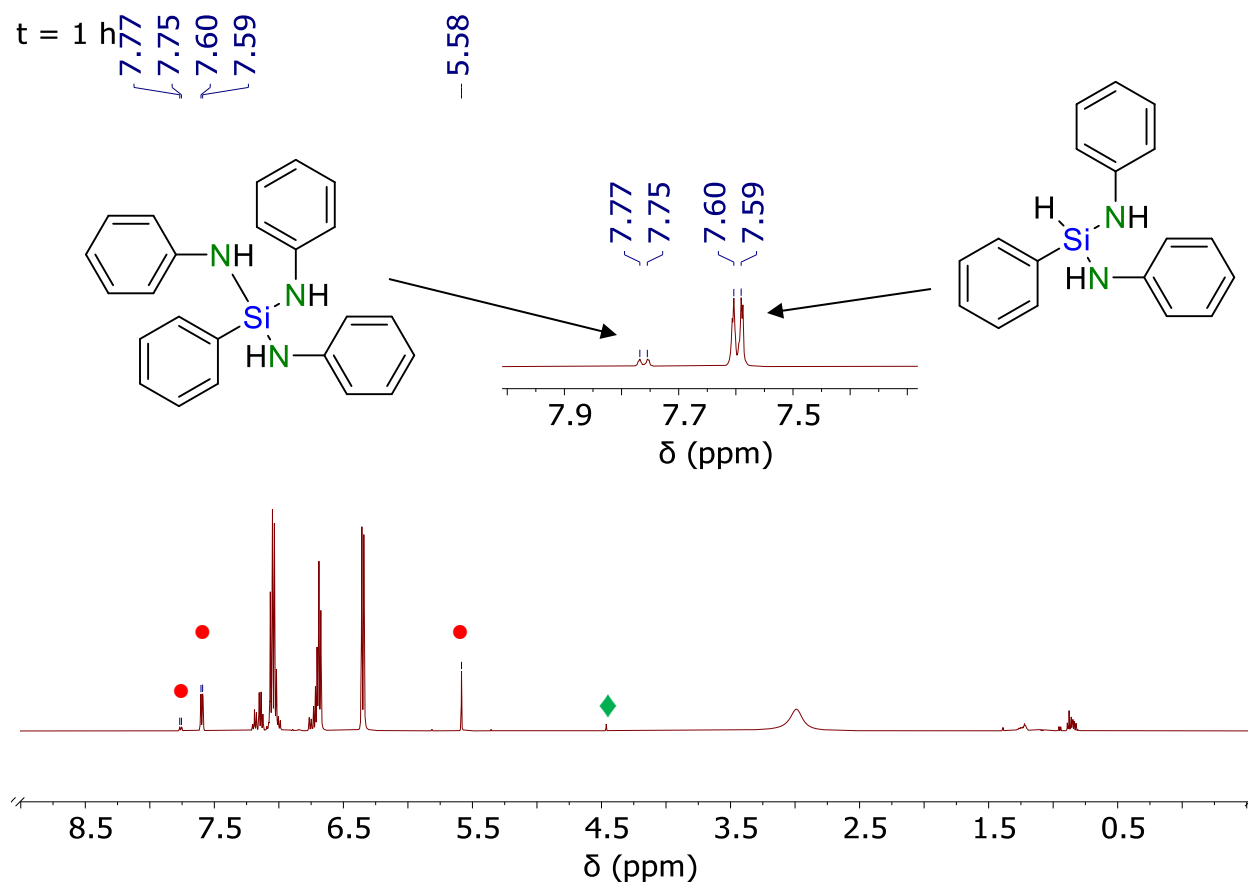

**Figure S3.7.** <sup>1</sup>H NMR spectrum of the reaction between PhSiH<sub>3</sub> and PhNH<sub>2</sub> catalyzed by **1** in benzene-*d*<sub>6</sub> after 1 h. Residual solvent was buried by product aryl peaks.



t = 1 h

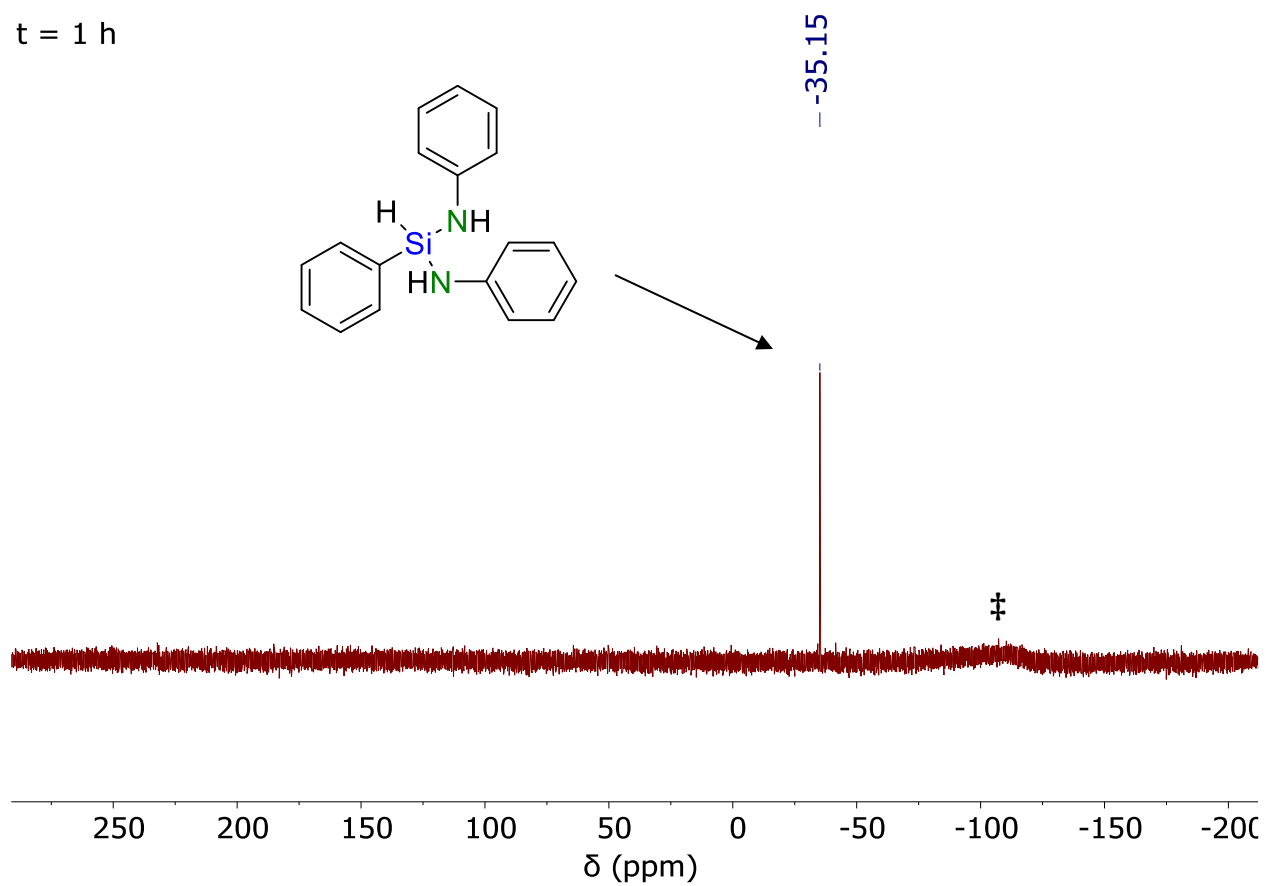

**Figure S3.8.**  $^{29}\text{Si}\{^1\text{H}\}$  NMR spectrum of the reaction between  $\text{PhSiH}_3$  and  $\text{PhNH}_2$  catalyzed by **1** in benzene- $d_6$  after 1 h.

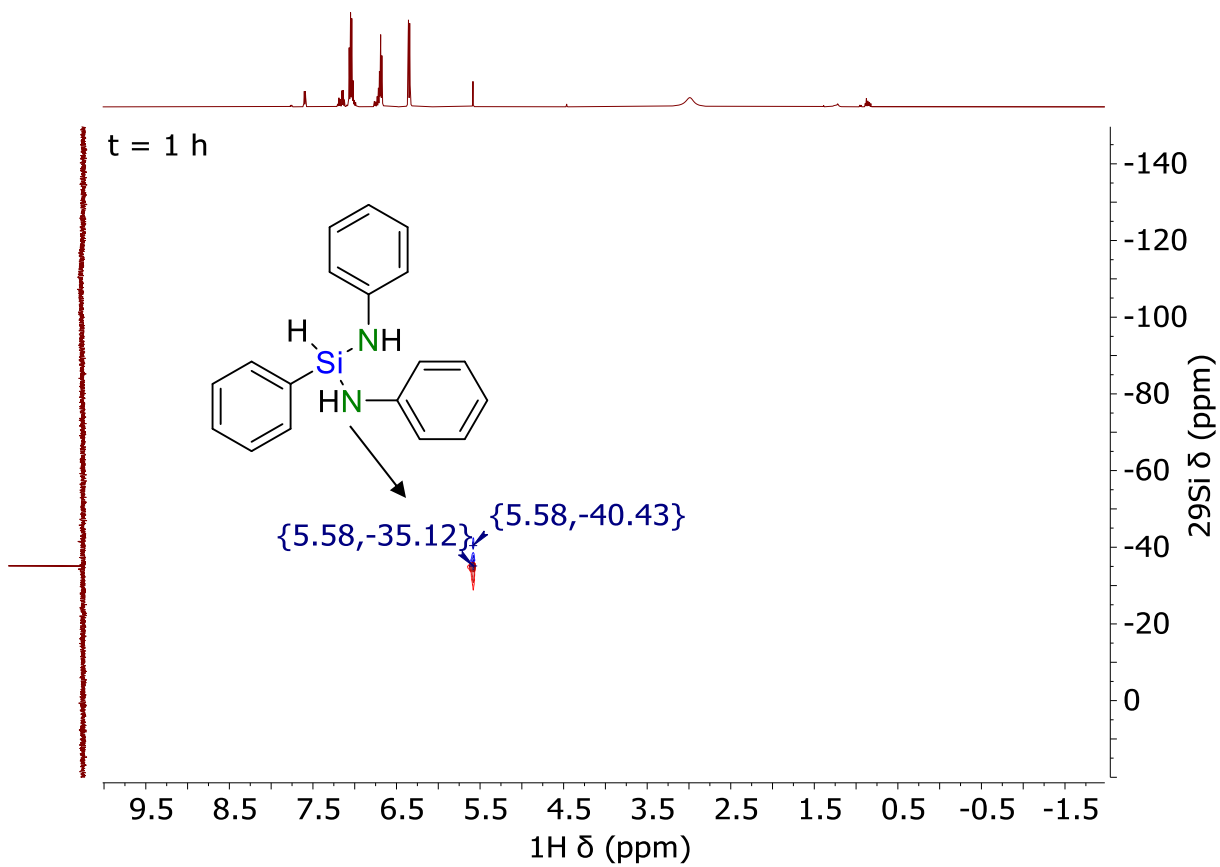

**Figure S3.9.**  $^{29}\text{Si}\{^1\text{H}\}$  NMR spectrum of the reaction between  $\text{PhSiH}_3$  and  $\text{PhNH}_2$  catalyzed by **1** in benzene- $d_6$  after 1 h.

### S5.6. PhSiH<sub>3</sub> and 6.0 equiv. of PyNH

PhSiH<sub>3</sub> (46.5  $\mu$ L,  $3.7 \times 10^{-1}$  mmol), PyNH (186.0  $\mu$ L,  $22.6 \times 10^{-1}$  mmol, 6.0 equiv.), and **1** (14.5  $\mu$ L,  $3.7 \times 10^{-2}$  mmol, 2.6 M in hexanes, 10.0 mol %) were reacted together in 0.5 mL of benzene-*d*<sub>6</sub>. Complete consumption of PhSiH<sub>3</sub> was observed after 0.5 h. The appearance of a multiplet centered at  $\delta = 3.10$  in the <sup>1</sup>H NMR spectrum indicated 100% conversion to PhSi(NPy)<sub>3</sub> after 0.5 h at ambient temperature.

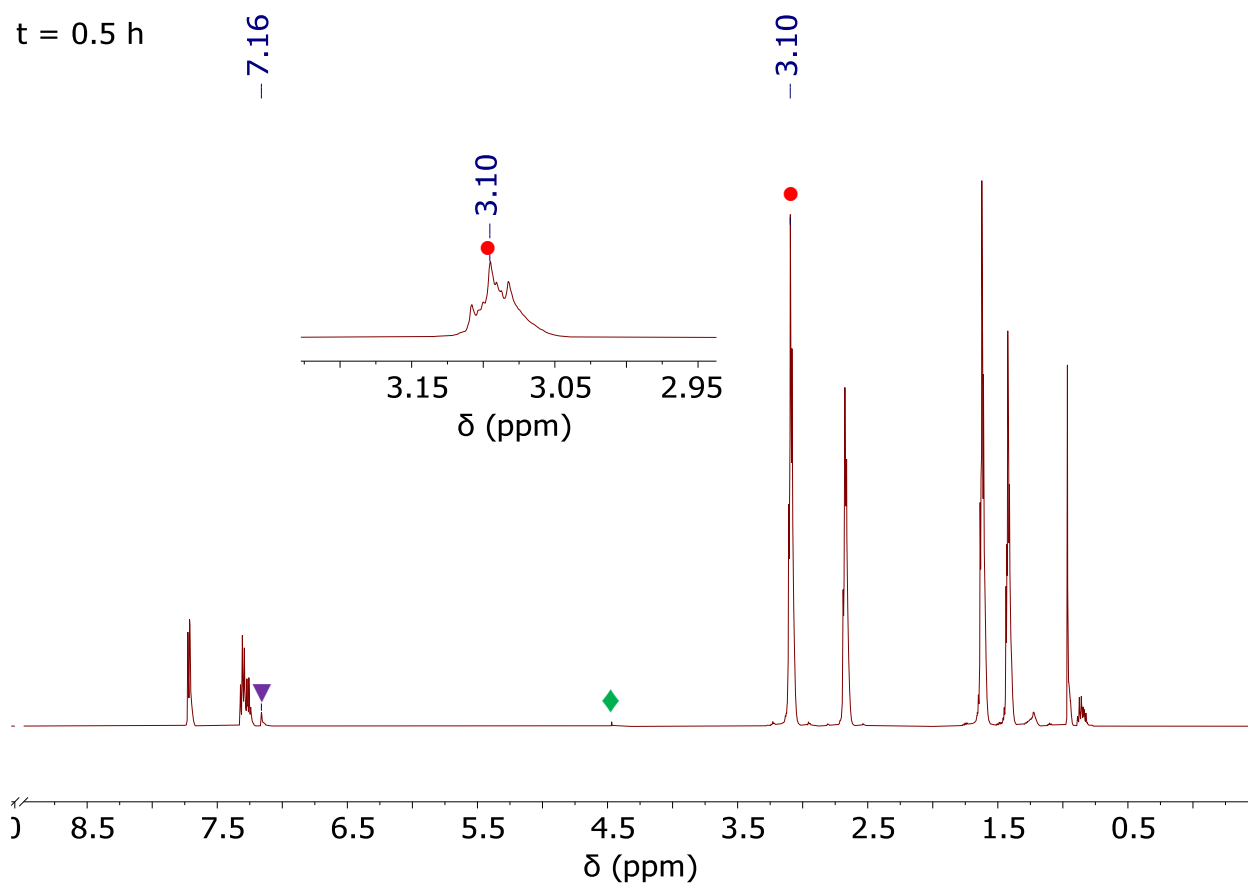

**Figure S3.10.** <sup>1</sup>H NMR spectrum of the reaction between PhSiH<sub>3</sub> and PyNH catalyzed by **1** in benzene-*d*<sub>6</sub> after 0.5 h.

### S5.7. PhSiH<sub>3</sub> and 6.0 equiv. of Et<sub>2</sub>NH

PhSiH<sub>3</sub> (46.5  $\mu$ L,  $3.7 \times 10^{-1}$  mmol), Et<sub>2</sub>NH (234.0  $\mu$ L,  $22.6 \times 10^{-1}$  mmol, 6.0 equiv.), and **1** (14.5  $\mu$ L,  $3.7 \times 10^{-2}$  mmol, 2.6 M in hexanes, 10.0 mol %) were reacted together in 0.5 mL of benzene-*d*<sub>6</sub>. Complete consumption of PhSiH<sub>3</sub> was observed after 1 h. The appearance of two diagnostic quartets, one centered between  $\delta = 2.91$  and  $\delta = 2.90$  and the second centered between  $\delta = 2.81$  and  $\delta = 2.80$  in the <sup>1</sup>H NMR spectrum, indicated 52% conversion to PhSiH(NEt<sub>2</sub>)<sub>2</sub> and 48% conversion to PhSiH<sub>2</sub>(NEt<sub>2</sub>) after 1 h at ambient temperature. The reaction was subsequently ended, due to the cessation of gas evolution. Spectra were consistent with previous reports of these compounds.<sup>6,8</sup>

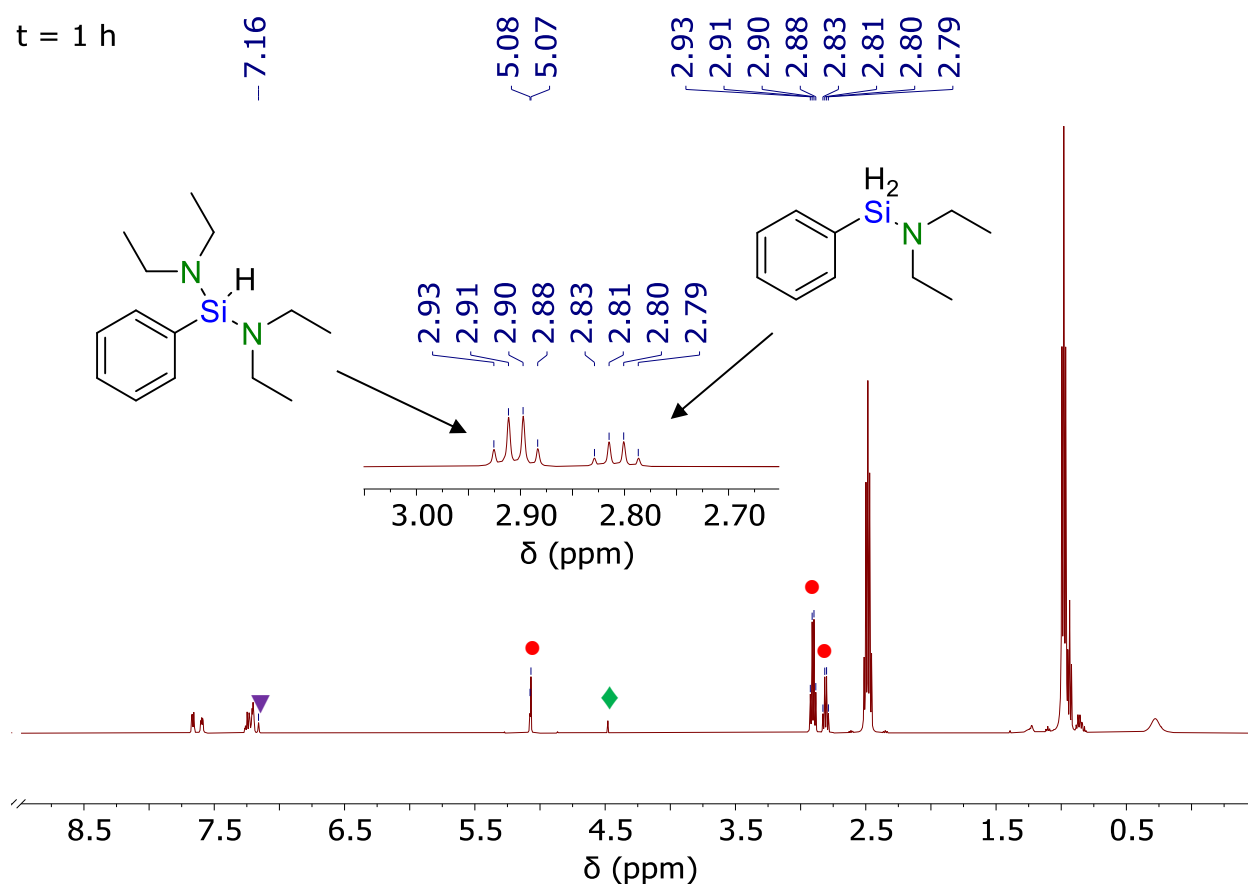

**Figure S3.11.** <sup>1</sup>H NMR spectrum of the reaction between PhSiH<sub>3</sub> and Et<sub>2</sub>NH catalyzed by **1** in benzene-*d*<sub>6</sub> after 1 h.

t = 1 h

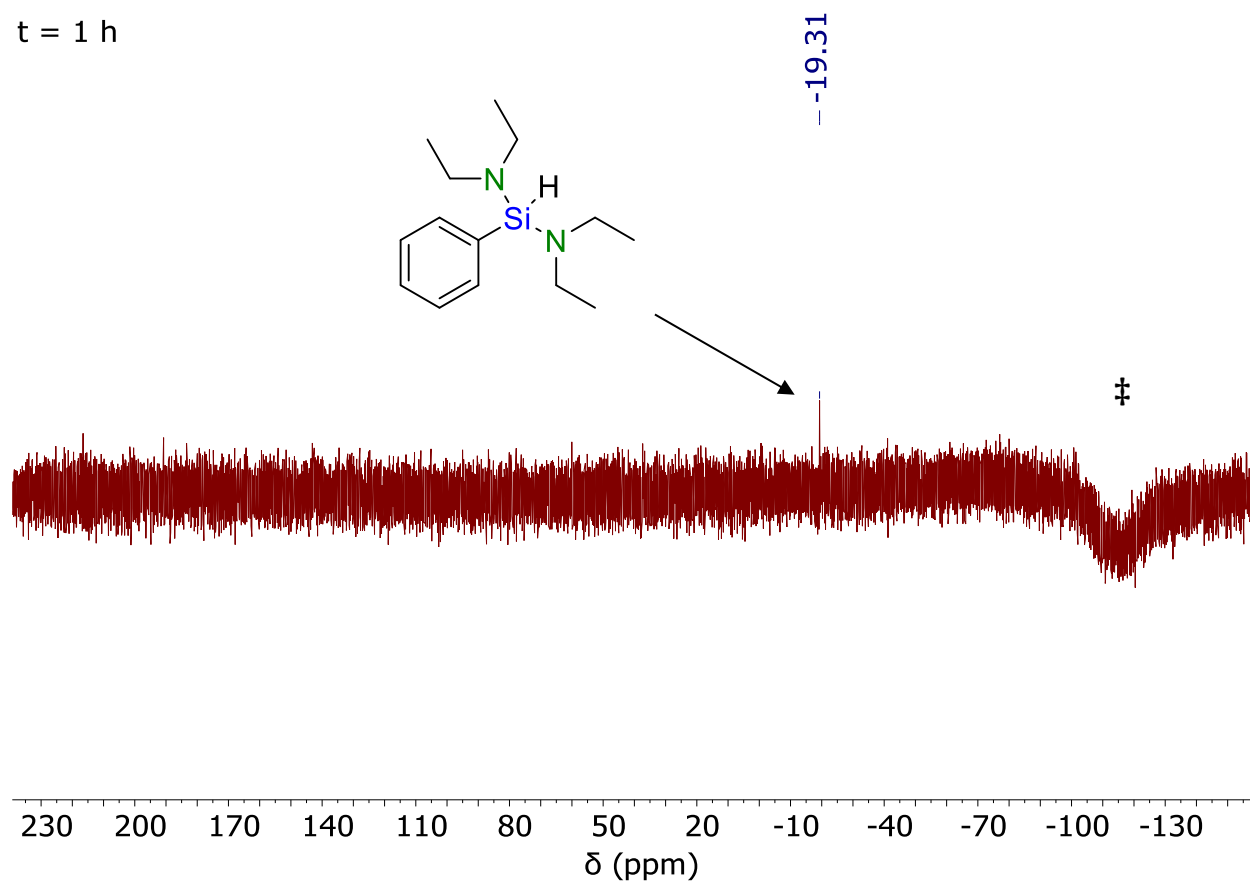

**Figure S3.12.**  $^{29}\text{Si}\{^1\text{H}\}$  NMR spectrum of the reaction between  $\text{PhSiH}_3$  and  $\text{Et}_2\text{NH}$  catalyzed by **1** in benzene- $d_6$  after 1 h.

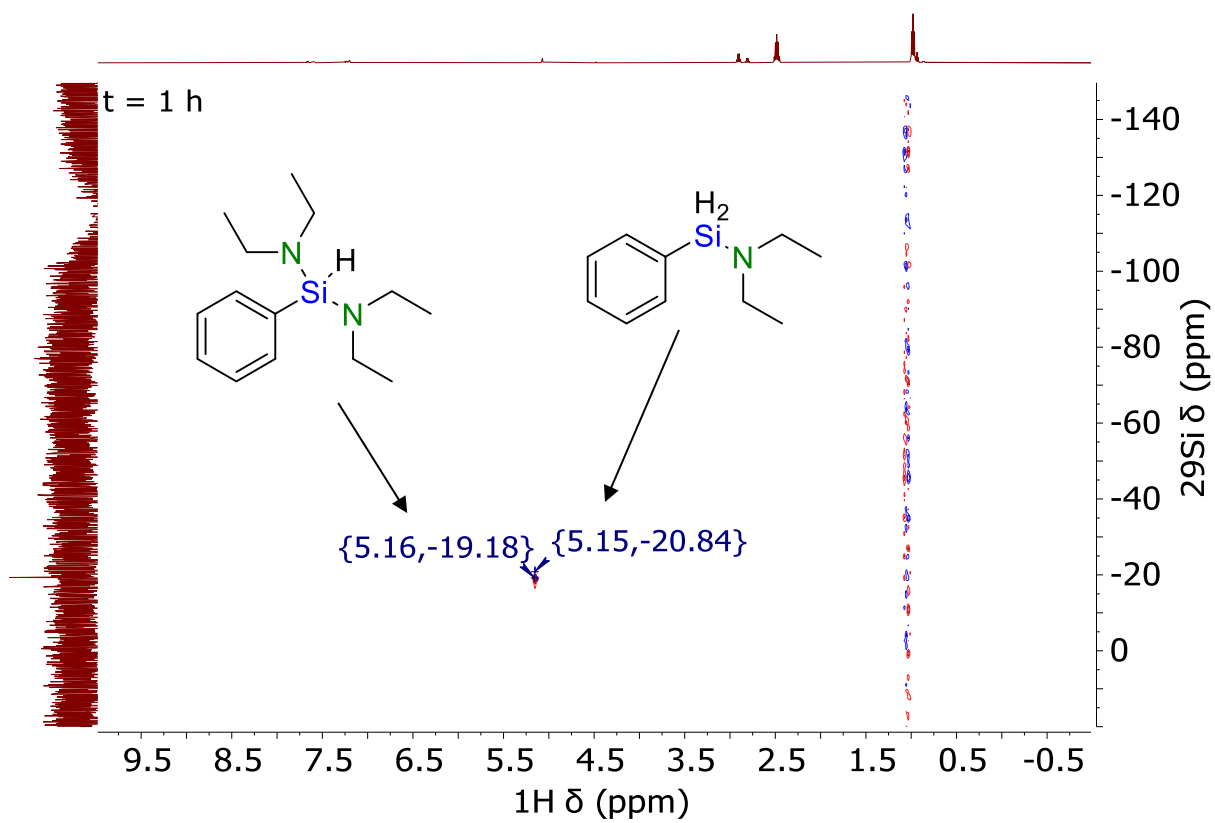

**Figure S3.13.**  $^1\text{H}$ - $^{29}\text{Si}\{^1\text{H}\}$  HSQC NMR spectrum of the reaction between  $\text{PhSiH}_3$  and  $\text{Et}_2\text{NH}$  catalyzed by **1** in benzene- $d_6$  after 1 h.

### S5.8. PhMeSiH<sub>2</sub> and 4.0 equiv. of <sup>n</sup>PrNH<sub>2</sub>

PhMeSiH<sub>2</sub> (51.5 μL, 3.7 × 10<sup>-1</sup> mmol), <sup>n</sup>PrNH<sub>2</sub> (123.5 μL, 15.0 × 10<sup>-1</sup> mmol, 4.0 equiv.), and **1** (14.5 μL, 3.7 × 10<sup>-2</sup> mmol, 2.6 M in hexanes, 10.0 mol %) were reacted together in 0.5 mL of benzene-*d*<sub>6</sub> in the presence of C<sub>6</sub>Me<sub>6</sub> standard (52.5 μL, 0.4 M in benzene-*d*<sub>6</sub>). Complete consumption of PhMeSiH<sub>2</sub> was observed after 1 h, as determined by the disappearance of the SiH peak at δ = 4.46 in the <sup>1</sup>H NMR spectrum. The appearance of a diagnostic peak at δ = 2.76 in the <sup>1</sup>H NMR spectrum, and a single peak in the <sup>29</sup>Si{<sup>1</sup>H} NMR spectrum at δ = -17.17, indicated 100% conversion to PhMeSi(NH<sup>n</sup>Pr)<sub>2</sub> after 1 h at ambient temperature. Spectra were consistent with previous reports of this compound.<sup>7</sup>

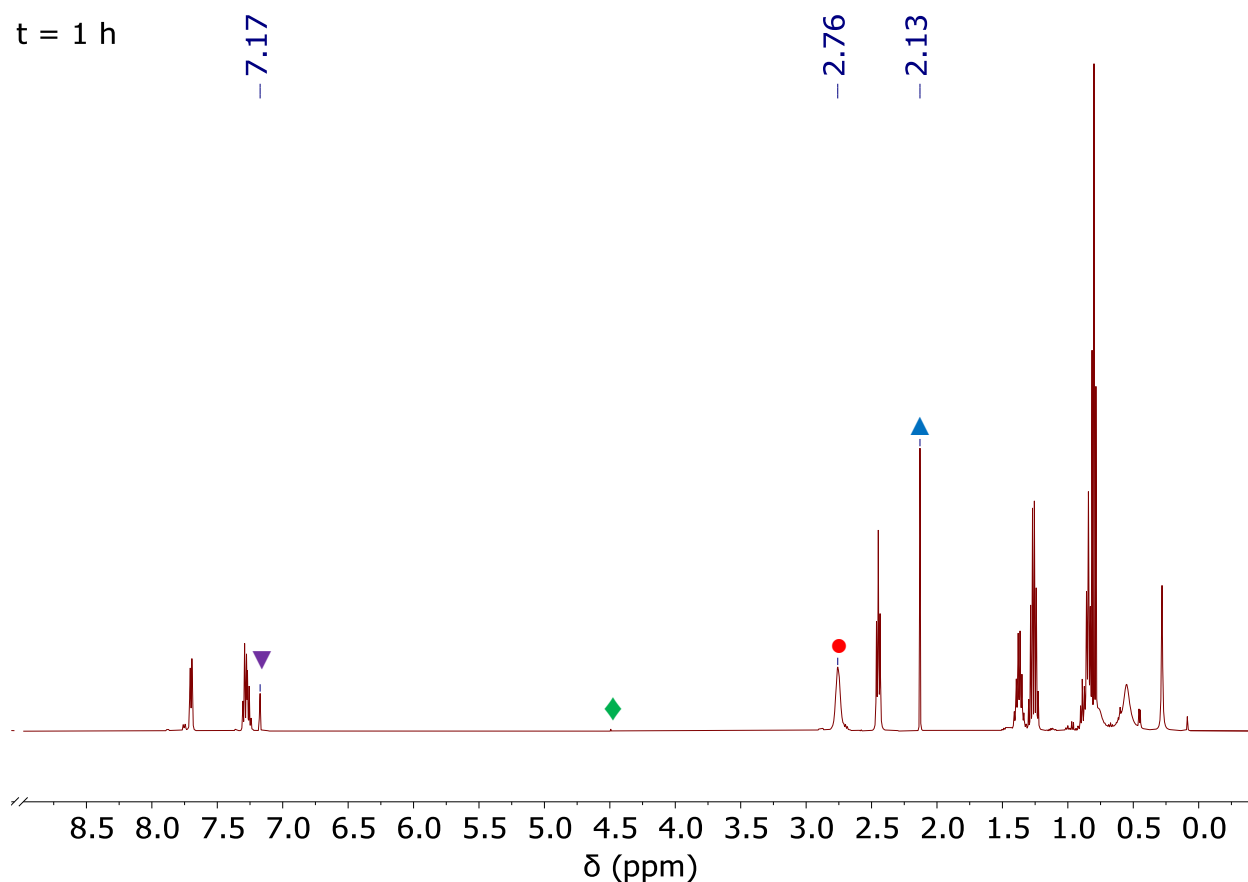

**Figure S3.14.** <sup>1</sup>H NMR spectrum of the reaction between PhMeSiH<sub>2</sub> and <sup>n</sup>PrNH<sub>2</sub> catalyzed by **1** in benzene-*d*<sub>6</sub> after 1 h.

t = 1 h

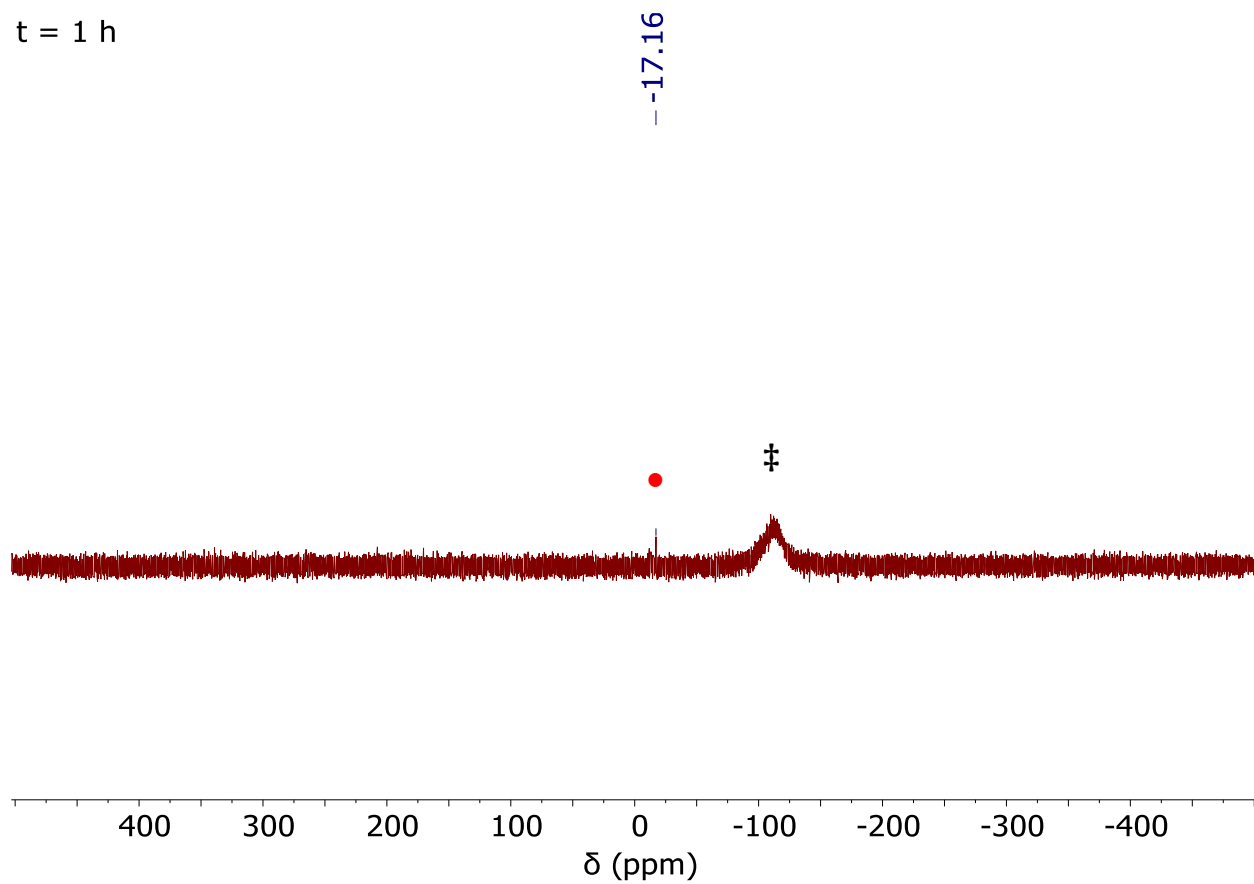

**Figure S3.15.**  $^{29}\text{Si}\{^1\text{H}\}$  NMR spectrum of the reaction between  $\text{PhMeSiH}_2$  and  $^t\text{PrNH}_2$  catalyzed by **1** in benzene- $d_6$  after 1 h.



### S5.9. PhMeSiH<sub>2</sub> and 4.0 equiv. of <sup>t</sup>PrNH<sub>2</sub>

PhMeSiH<sub>2</sub> (51.5 μL, 3.7 × 10<sup>-1</sup> mmol), <sup>t</sup>PrNH<sub>2</sub> (128.5 μL, 15.0 × 10<sup>-1</sup> mmol, 4.0 equiv.), and **1** (14.5 μL, 3.7 × 10<sup>-2</sup> mmol, 2.6 M in hexanes, 10.0 mol %) were reacted together in 0.5 mL of benzene-*d*<sub>6</sub> in the presence of C<sub>6</sub>Me<sub>6</sub> standard (52.5 μL, 0.4 M in benzene-*d*<sub>6</sub>). Complete consumption of PhMeSiH<sub>2</sub> was observed after 1 h. The appearance of a diagnostic multiplet centered at δ = 3.16 in the <sup>1</sup>H NMR spectrum, and a single peak at δ = -20.21 in the <sup>29</sup>Si{<sup>1</sup>H} NMR spectrum, indicated 100% conversion to PhMeSi(NH<sup>t</sup>Pr)<sub>2</sub> after 1 h at ambient temperature. Spectra were consistent with previous reports of this compound.<sup>6,9</sup>

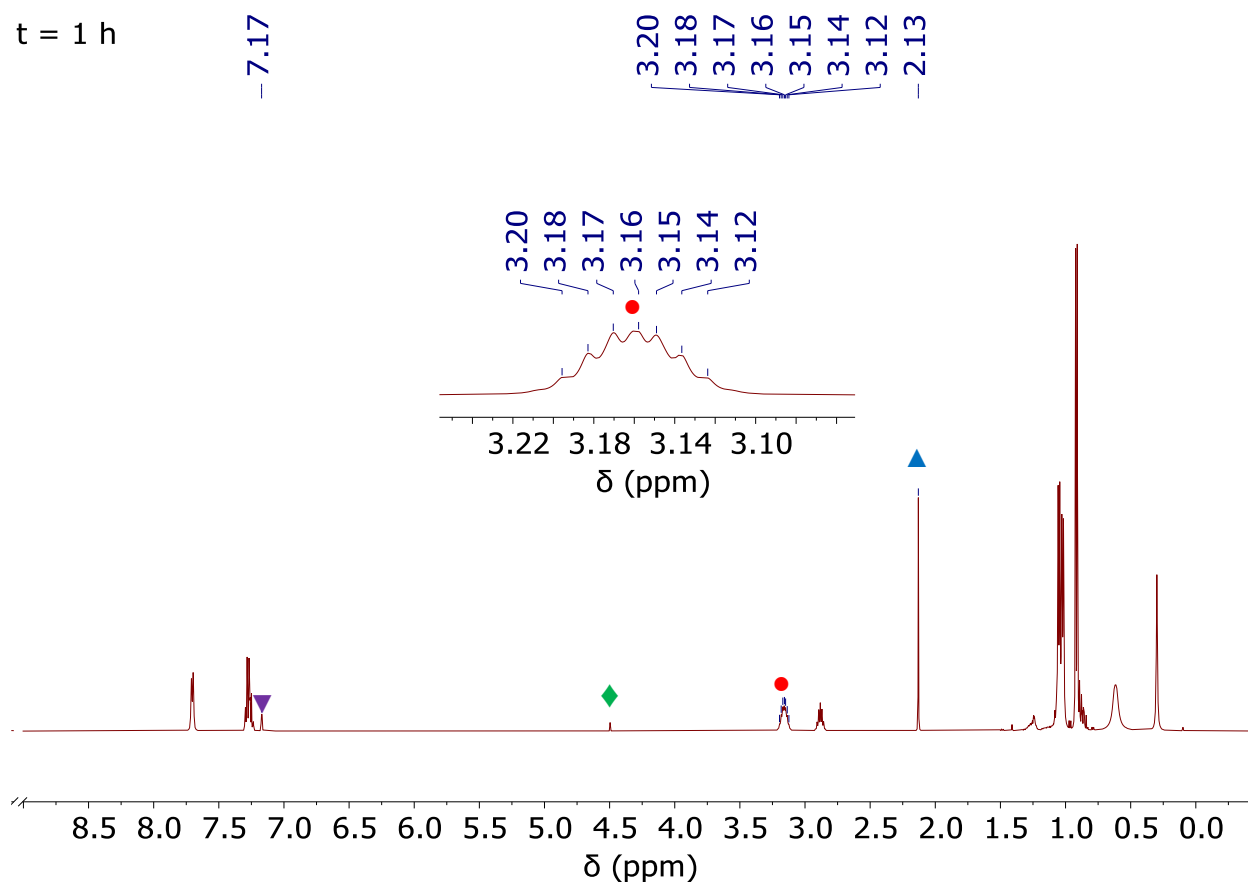

**Figure S3.16.** <sup>1</sup>H NMR spectrum of the reaction between PhMeSiH<sub>2</sub> and <sup>t</sup>PrNH<sub>2</sub> catalyzed by **1** in benzene-*d*<sub>6</sub> after 1 h.

t = 1 h

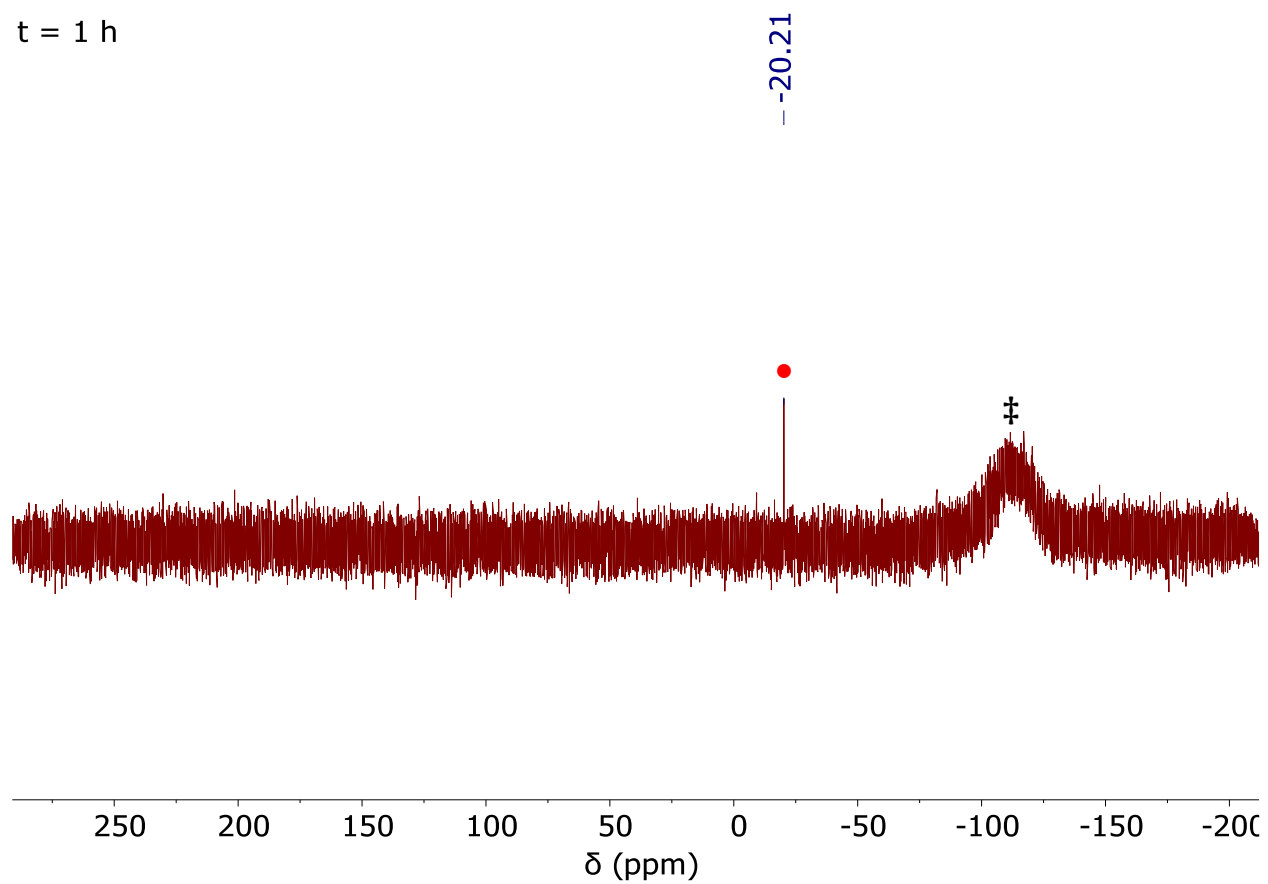

**Figure S3.17.**  $^{29}\text{Si}\{^1\text{H}\}$  NMR spectrum of the reaction between  $\text{PhMeSiH}_2$  and  $t\text{PrNH}_2$  catalyzed by **1** in benzene- $d_6$  after 1 h.

### S5.10. PhMeSiH<sub>2</sub> and 4.0 equiv. of <sup>t</sup>BuNH<sub>2</sub>

PhMeSiH<sub>2</sub> (52.0 μL, 3.7 × 10<sup>-1</sup> mmol), <sup>t</sup>BuNH<sub>2</sub> (159.5 μL, 15.0 × 10<sup>-1</sup> mmol, 4.0 equiv.), and **1** (16.5 μL, 3.7 × 10<sup>-2</sup> mmol, 2.3 M in hexanes, 10.0 mol %) were reacted together in 0.5 mL of benzene-*d*<sub>6</sub> in the presence of C<sub>6</sub>Me<sub>6</sub> (52.5 μL, 0.4 M in benzene-*d*<sub>6</sub>). Complete consumption of PhMeSiH<sub>2</sub> was observed after 1 h. The appearance of a quintet centered at δ = 1.08, and a diagnostic signal at δ = -21.50 in the <sup>1</sup>H-<sup>29</sup>Si{<sup>1</sup>H} HSQC NMR spectrum, indicated at least 96% conversion to PhMeSiH(NH<sup>t</sup>Bu) after 1 h at ambient temperature. The appearance of two additional Me peaks contributed to lower aminosilane conversions. Spectra were consistent with previous reports of this compound.<sup>7</sup>

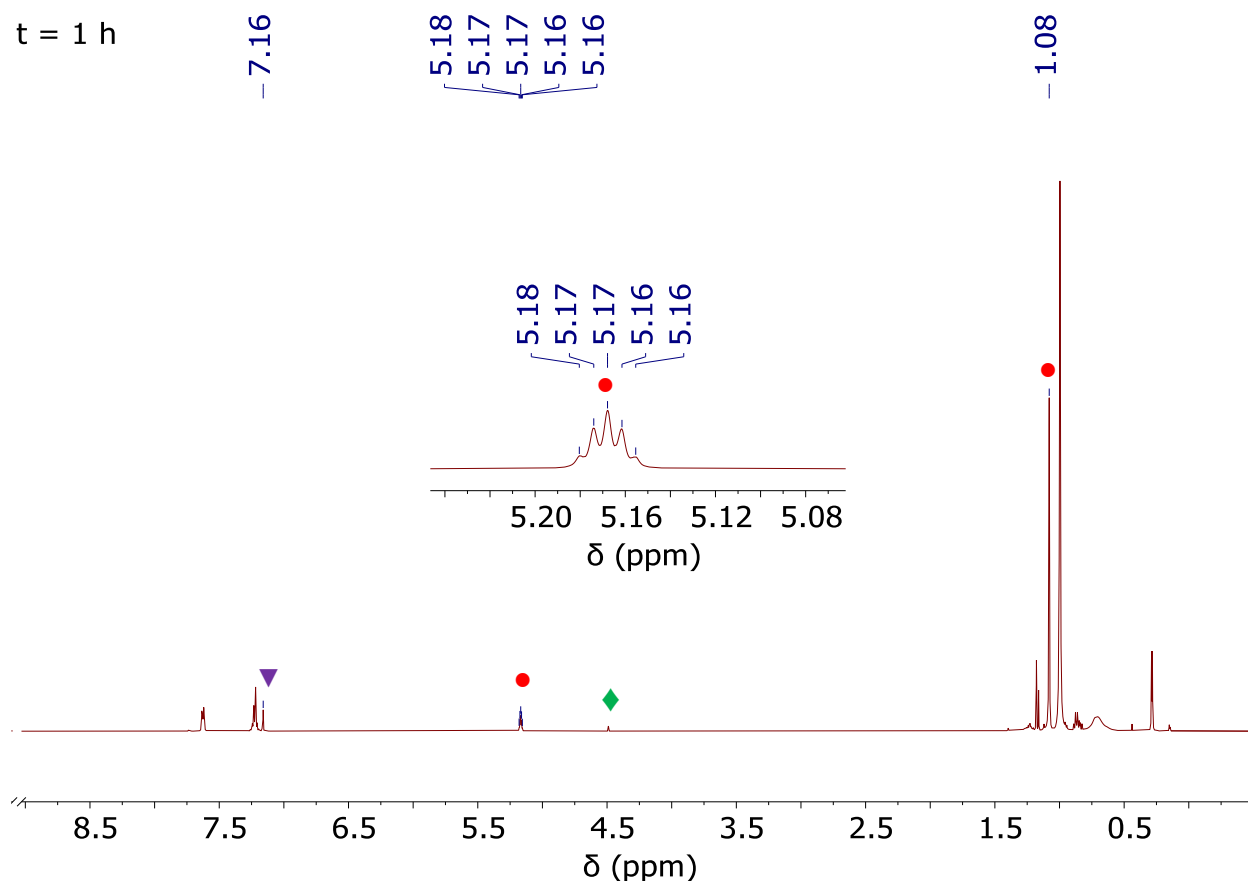

**Figure S3.18.** <sup>1</sup>H NMR spectrum of the reaction between PhMeSiH<sub>2</sub> and <sup>t</sup>BuNH<sub>2</sub> catalyzed by **1** in benzene-*d*<sub>6</sub> after 1 h.

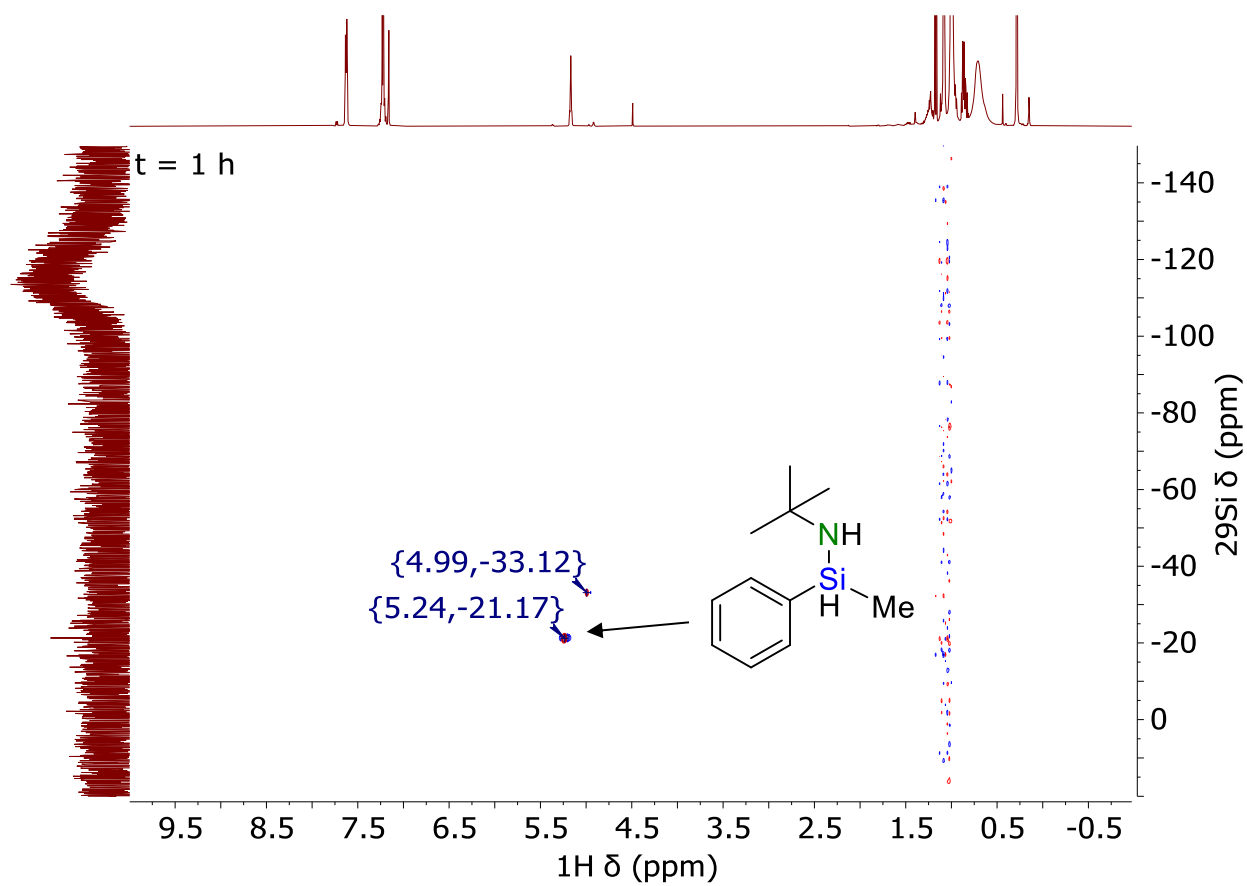

**Figure S3.19.**  $^1\text{H}$ - $^{29}\text{Si}\{^1\text{H}\}$  HSQC NMR spectrum of the reaction between  $\text{PhMeSiH}_2$  and  $t\text{BuNH}_2$  catalyzed by **1** in benzene- $d_6$  after 1 h.

### S5.11. PhMeSiH<sub>2</sub> and 4.0 equiv. of PhNH<sub>2</sub>

PhMeSiH<sub>2</sub> (52.0  $\mu$ L,  $3.7 \times 10^{-1}$  mmol), PhNH<sub>2</sub> (137.0  $\mu$ L,  $15.0 \times 10^{-1}$  mmol, 4.0 equiv.), and **1** (16.5  $\mu$ L,  $3.7 \times 10^{-2}$  mmol, 2.3 M in hexanes, 10.0 mol %) were reacted together in 0.5 mL of benzene-*d*<sub>6</sub> in the presence of C<sub>6</sub>Me<sub>6</sub> (52.5  $\mu$ L, 0.4 M in benzene-*d*<sub>6</sub>). Incomplete consumption of PhMeSiH<sub>2</sub> was observed after 1 h. Based on the relative integrations of product peak at  $\delta = 0.29$  to reagent peak at  $\delta = 0.20$ , PhMeSiH(NHPh) was formed in 53% conversion after 1 h at ambient temperature. Spectra were consistent with previous reports of this compound.<sup>7</sup>

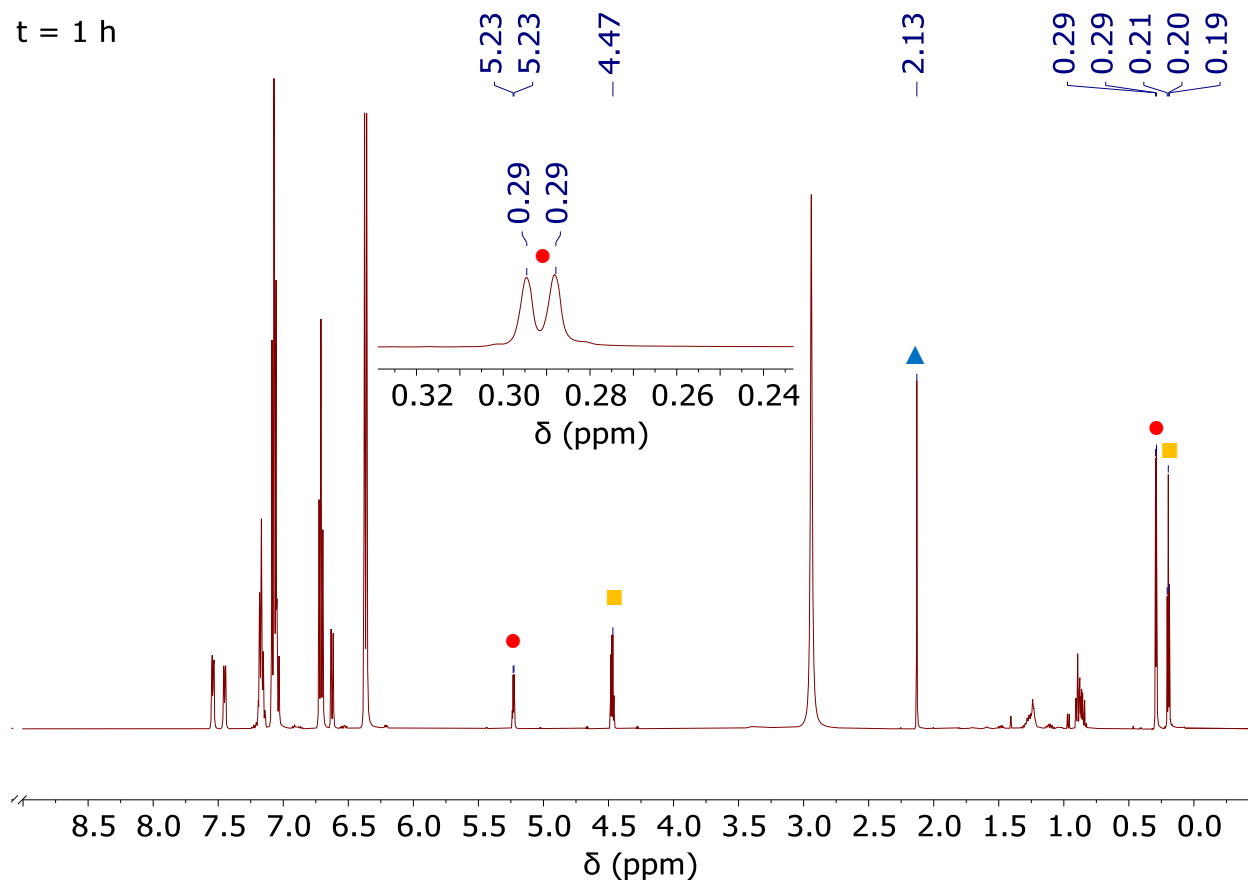

**Figure S3.20.** <sup>1</sup>H NMR spectrum of the reaction between PhMeSiH<sub>2</sub> and PhNH<sub>2</sub> catalyzed by **1** in benzene-*d*<sub>6</sub> after 1 h.

t = 1 h

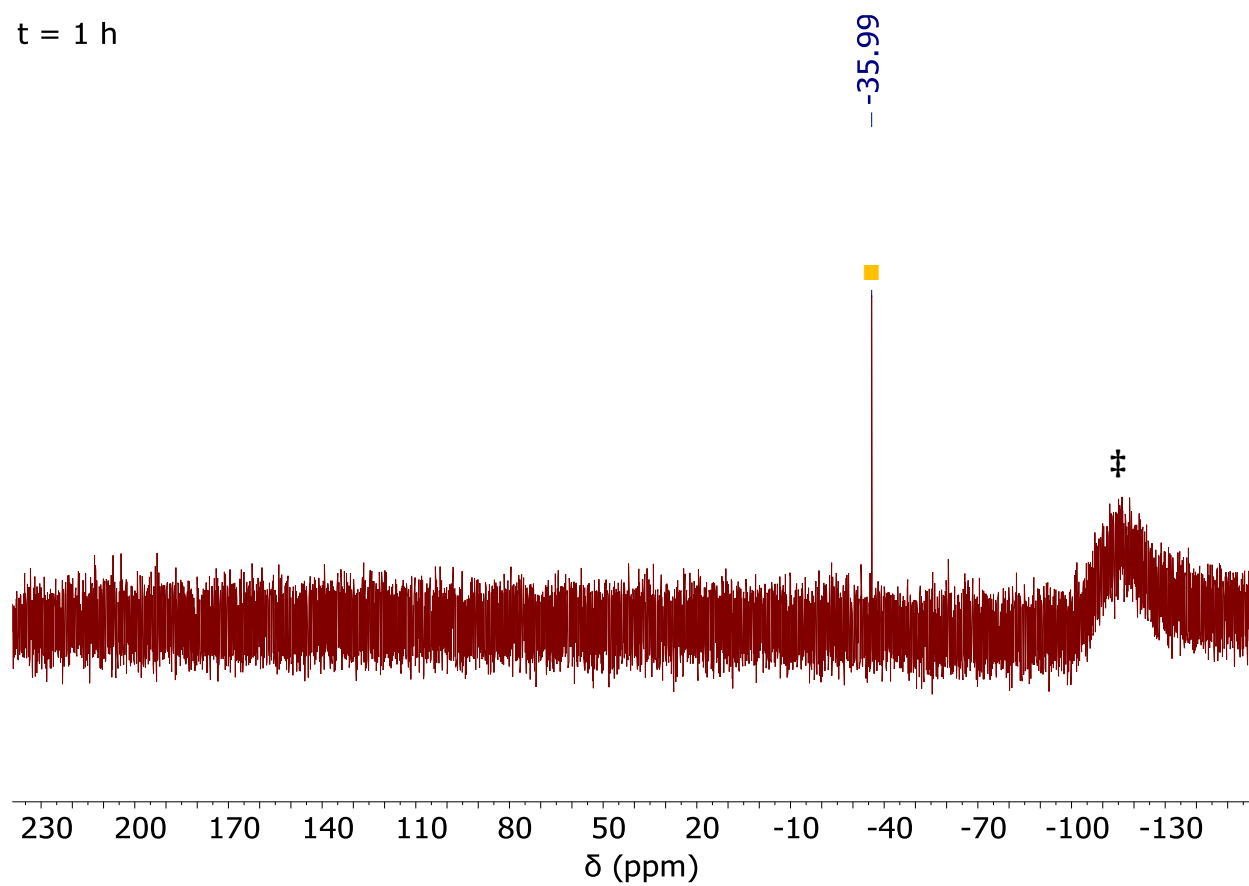

**Figure S3.21.**  $^{29}\text{Si}\{^1\text{H}\}$  NMR spectrum of the reaction between  $\text{PhMeSiH}_2$  and  $\text{PhNH}_2$  catalyzed by **1** in benzene- $d_6$  after 1 h. The peak at  $\delta = -35.99$  is  $\text{PhMeSiH}_2$ .

### S5.12. PhMeSiH<sub>2</sub> and 4.0 equiv. of PyNH

PhMeSiH<sub>2</sub> (52.0  $\mu$ L,  $3.7 \times 10^{-1}$  mmol), PyNH (159.5  $\mu$ L,  $15.0 \times 10^{-1}$  mmol, 4.0 equiv.), and **1** (16.5  $\mu$ L,  $3.7 \times 10^{-2}$  mmol, 2.3 M in hexanes, 10.0 mol %) were reacted together in 0.5 mL of benzene-*d*<sub>6</sub>. Complete consumption of PhMeSiH<sub>2</sub> was observed after 0.5 h. The appearance of a diagnostic multiplet centered at  $\delta = 3.01$  in the <sup>1</sup>H NMR spectrum indicated 100% conversion to PhMeSi(NPy)<sub>2</sub> after 0.5 h at ambient temperature.

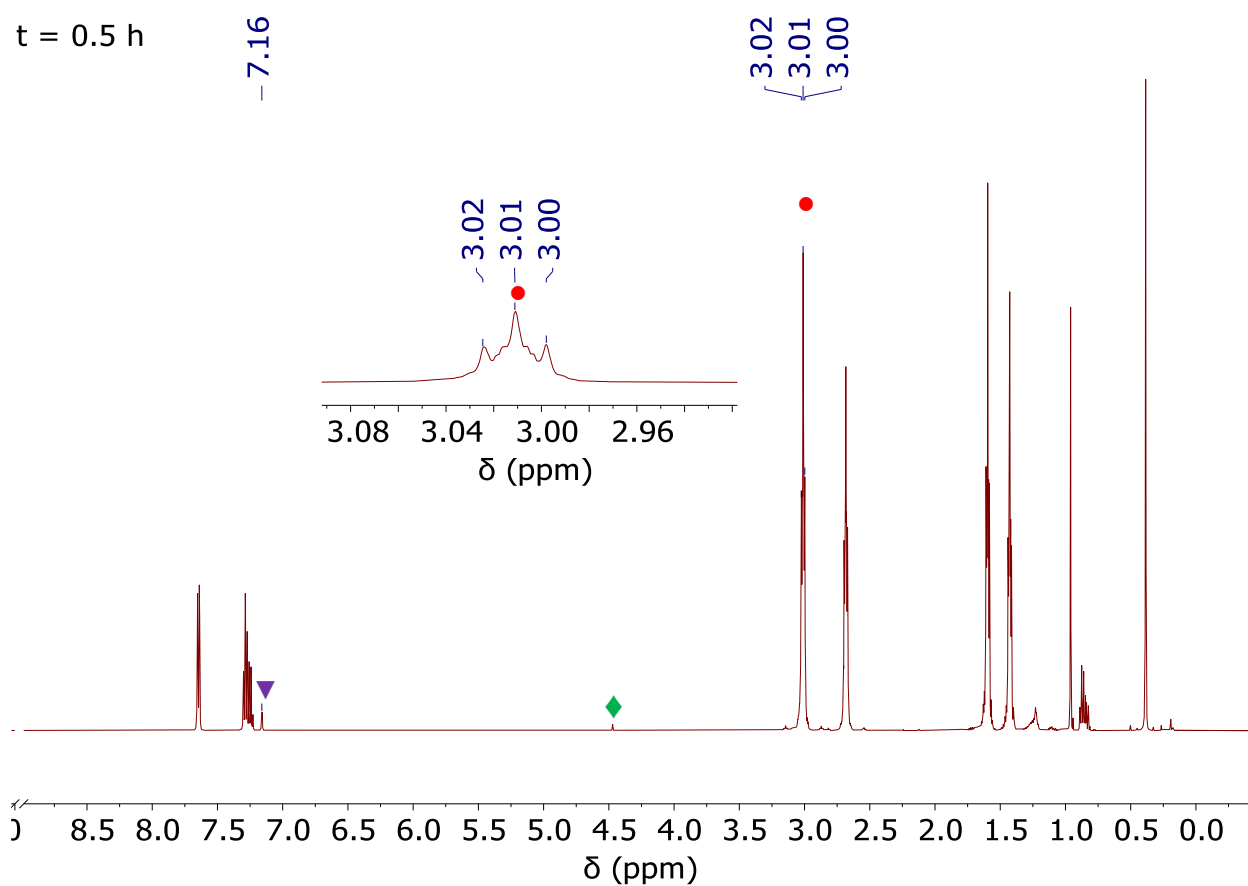

**Figure S3.22.** <sup>1</sup>H NMR spectrum of the reaction between PhMeSiH<sub>2</sub> and PyNH catalyzed by **1** in benzene-*d*<sub>6</sub> after 0.5 h.





t = 1 h

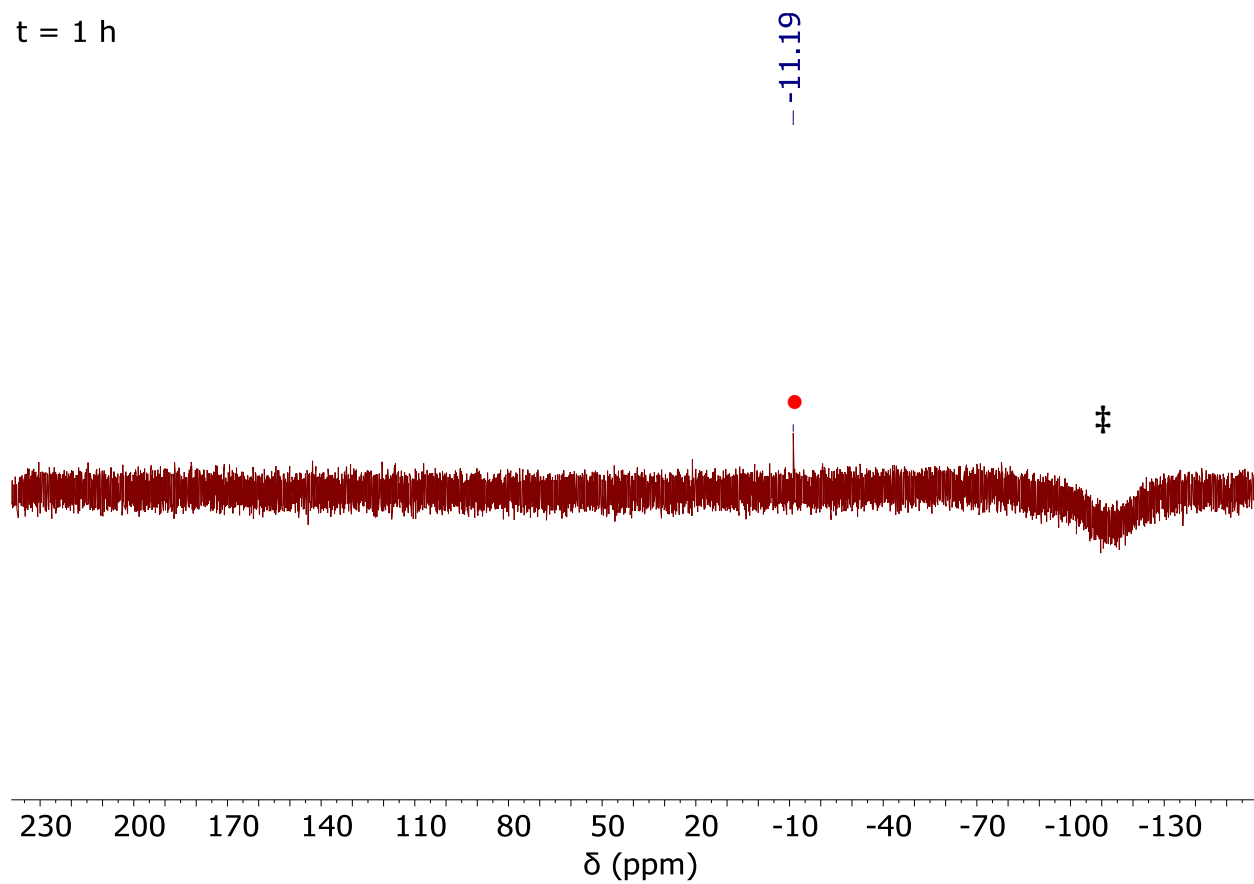

**Figure S3.24.**  $^{29}\text{Si}$  NMR spectrum of the reaction between  $\text{PhMeSiH}_2$  and  $\text{Et}_2\text{NH}$  catalyzed by **1** in benzene- $d_6$  after 1 h.

### S5.14. Ph<sub>2</sub>SiH<sub>2</sub> and 4.0 equiv. of <sup>n</sup>PrNH<sub>2</sub>

Ph<sub>2</sub>SiH<sub>2</sub> (70.0 μL, 3.7 × 10<sup>-1</sup> mmol), <sup>n</sup>PrNH<sub>2</sub> (123.5 μL, 15.0 × 10<sup>-1</sup> mmol, 4.0 equiv.), and **1** (14.5 μL, 3.7 × 10<sup>-2</sup> mmol, 2.6 M in hexanes, 10.0 mol %) were reacted together in 0.5 mL of benzene-*d*<sub>6</sub> in the presence of C<sub>6</sub>Me<sub>6</sub> standard (52.5 μL, 0.4 M in benzene-*d*<sub>6</sub>). Complete consumption of Ph<sub>2</sub>SiH<sub>2</sub> was observed after 1 h, as determined by the disappearance of the SiH peak at δ = 5.08 in the <sup>1</sup>H NMR spectrum. The appearance of a diagnostic quartet centered between δ = 2.84 and δ = 2.85 in the <sup>1</sup>H NMR spectrum, and a single peak at δ = -25.50 in the <sup>29</sup>Si{<sup>1</sup>H} NMR spectrum, indicated 99% conversion to Ph<sub>2</sub>Si(NH<sup>n</sup>Pr)<sub>2</sub> after 1 h at ambient temperature. Spectra were consistent with previous reports of this compound.<sup>7</sup>

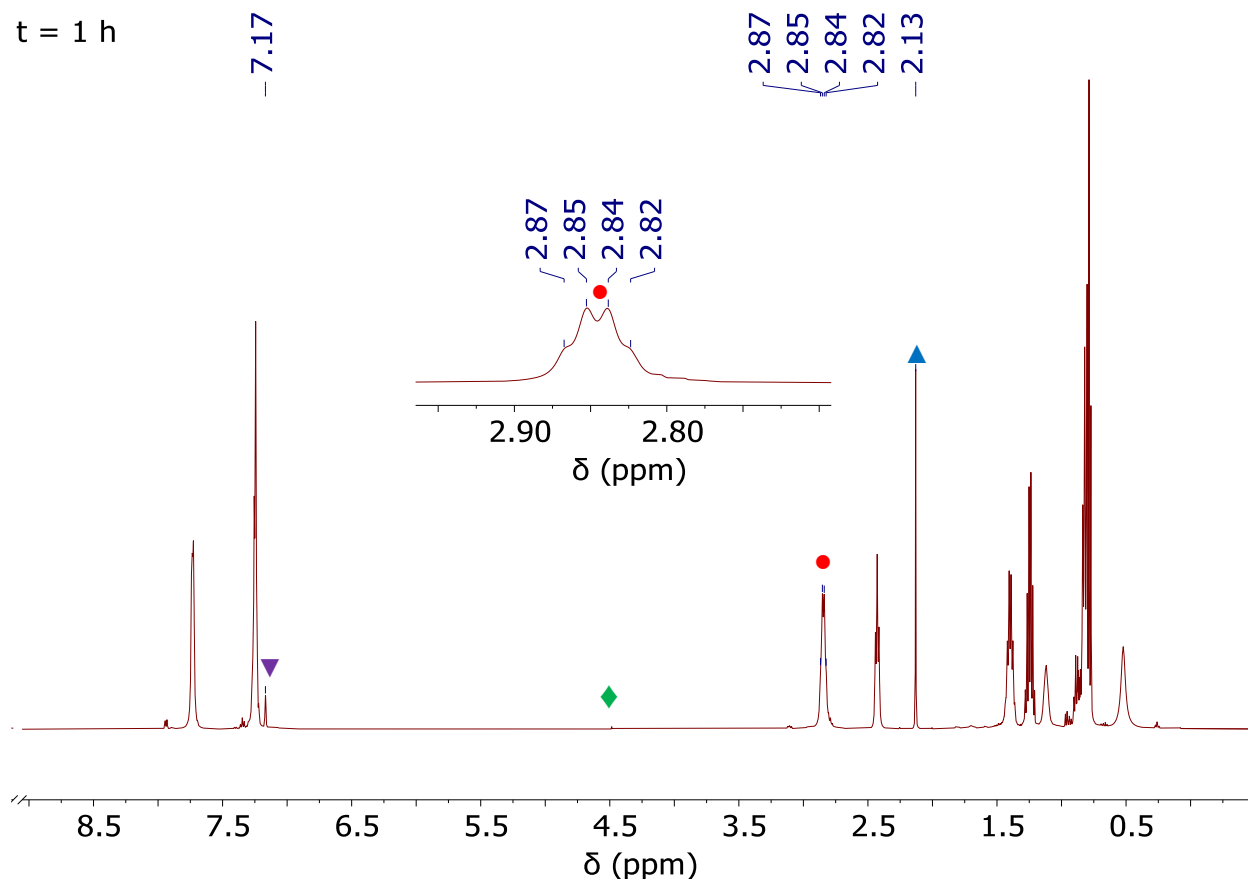

**Figure S3.25.** <sup>1</sup>H NMR spectrum of the reaction between Ph<sub>2</sub>SiH<sub>2</sub> and <sup>n</sup>PrNH<sub>2</sub> catalyzed by **1** in benzene-*d*<sub>6</sub> after 1 h.

t = 1 h

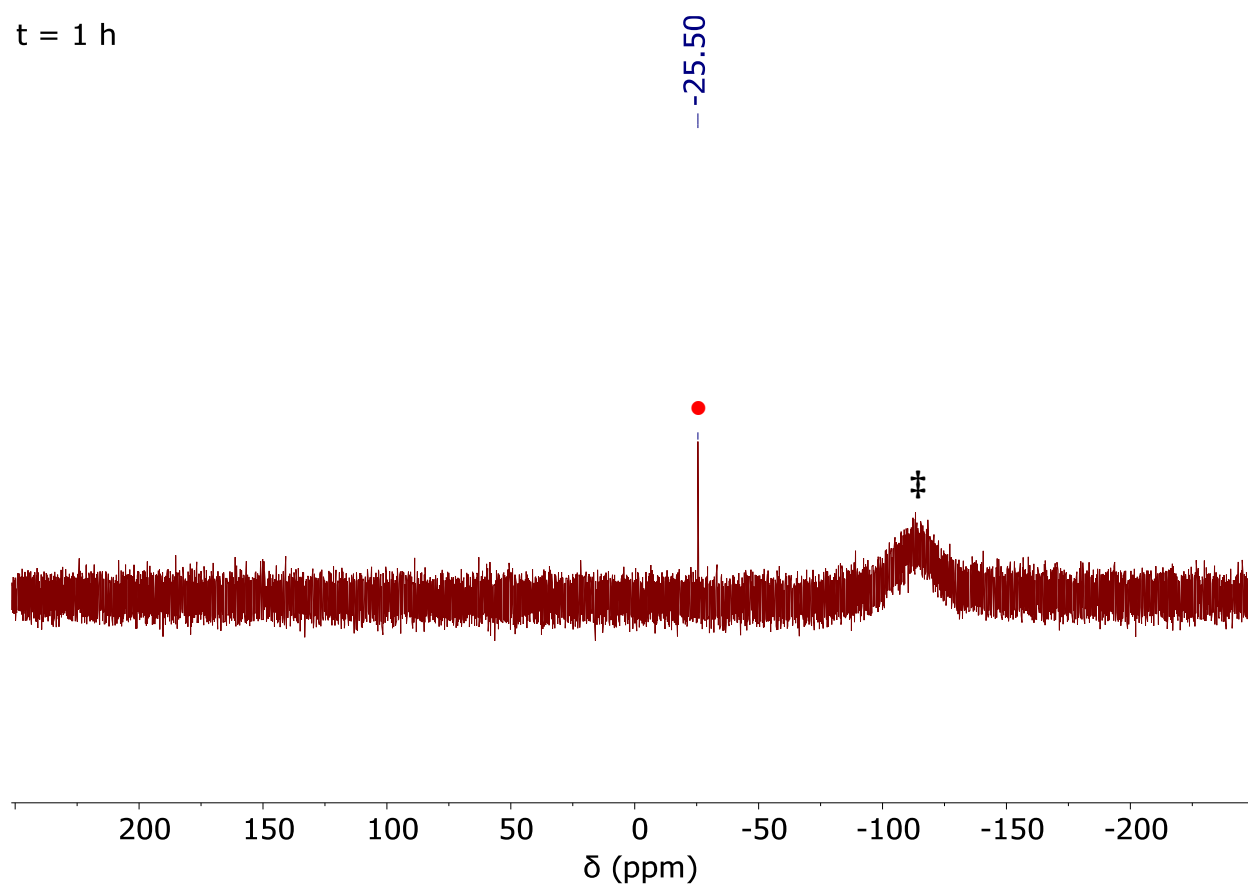

**Figure S3.26.**  $^{29}\text{Si}\{^1\text{H}\}$  NMR spectrum of the reaction between  $\text{Ph}_2\text{SiH}_2$  and  $^n\text{PrNH}_2$  catalyzed by **1** in benzene- $d_6$  after 1 h.

### S5.15. Ph<sub>2</sub>SiH<sub>2</sub> and 4.0 equiv. of <sup>t</sup>PrNH<sub>2</sub>

Ph<sub>2</sub>SiH<sub>2</sub> (70.5 μL, 3.7 × 10<sup>-1</sup> mmol), <sup>t</sup>PrNH<sub>2</sub> (130.0 μL, 15.0 × 10<sup>-1</sup> mmol, 4.0 equiv.), and **1** (14.5 μL, 3.7 × 10<sup>-2</sup> mmol, 2.6 M in hexanes, 10.0 mol %) were reacted together in 0.5 mL of benzene-*d*<sub>6</sub> in the presence of C<sub>6</sub>Me<sub>6</sub> standard (52.5 μL, 0.4 M in benzene-*d*<sub>6</sub>). Complete consumption of Ph<sub>2</sub>SiH<sub>2</sub> was observed after 1 h. The appearance of a diagnostic multiplet centered at δ = 3.27 in the <sup>1</sup>H NMR spectrum, and a single peak at δ = -28.44 in the <sup>29</sup>Si{<sup>1</sup>H} NMR spectrum, indicated 100% conversion to Ph<sub>2</sub>Si(NH<sup>t</sup>Pr)<sub>2</sub> after 1 h at ambient temperature. Spectra were consistent with previous reports of this compound.<sup>6</sup>

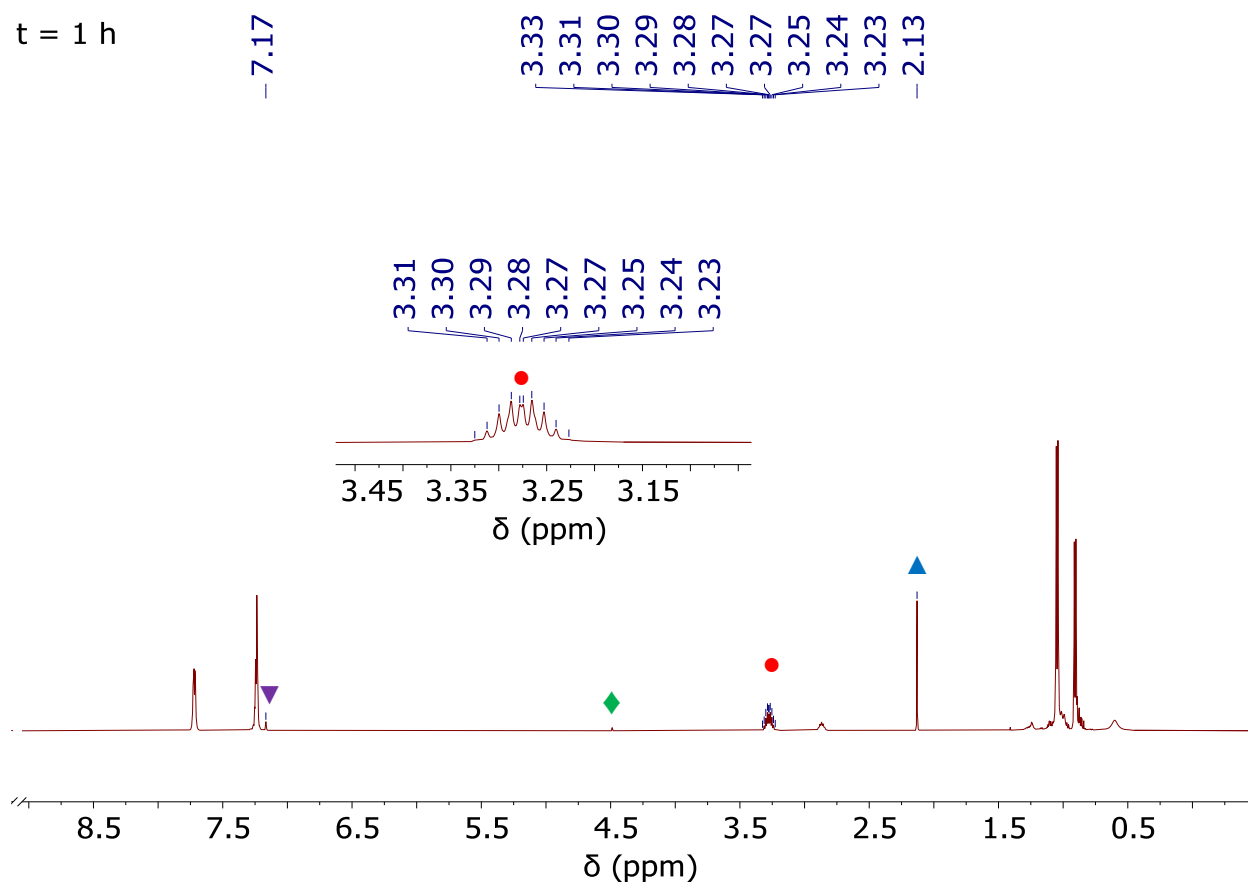

**Figure S3.27.** <sup>1</sup>H NMR spectrum of the reaction between Ph<sub>2</sub>SiH<sub>2</sub> and <sup>t</sup>PrNH<sub>2</sub> catalyzed by **1** in benzene-*d*<sub>6</sub> after 1 h.

t = 1 h

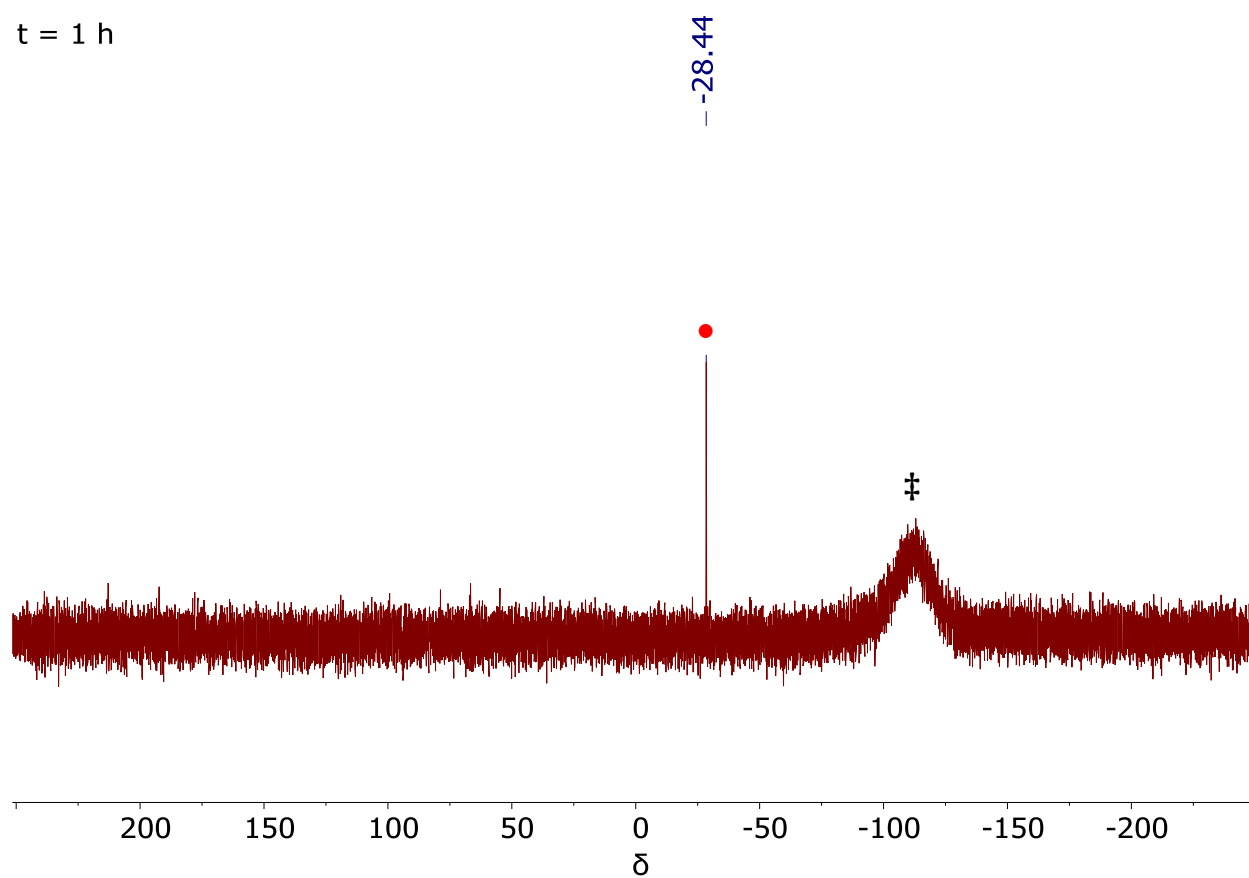

**Figure S3.28.**  $^{29}\text{Si}\{^1\text{H}\}$  NMR spectrum of the reaction between  $\text{Ph}_2\text{SiH}_2$  and  $\text{PrNH}_2$  catalyzed by **1** in benzene- $d_6$  after 1 h.

### S5.16. Ph<sub>2</sub>SiH<sub>2</sub> and 4.0 equiv. of <sup>t</sup>BuNH<sub>2</sub>

Ph<sub>2</sub>SiH<sub>2</sub> (70.0 μL, 3.7 × 10<sup>-1</sup> mmol), <sup>t</sup>BuNH<sub>2</sub> (158.0 μL, 15.0 × 10<sup>-1</sup> mmol, 4.0 equiv.), and **1** (14.5 μL, 3.7 × 10<sup>-1</sup> mmol, 2.6 M in hexanes, 10.0 mol %) were reacted together in 0.5 mL of benzene-*d*<sub>6</sub>. Complete consumption of Ph<sub>2</sub>SiH<sub>2</sub> was observed after 1 h. After 1 h at ambient temperature, Ph<sub>2</sub>SiH(NH<sup>t</sup>Bu) and Ph<sub>2</sub>Si(NH<sup>t</sup>Bu)<sub>2</sub> were formed in approximately 97% and 3% conversion. Spectra were consistent with previous reports of these compounds.<sup>7,10</sup>

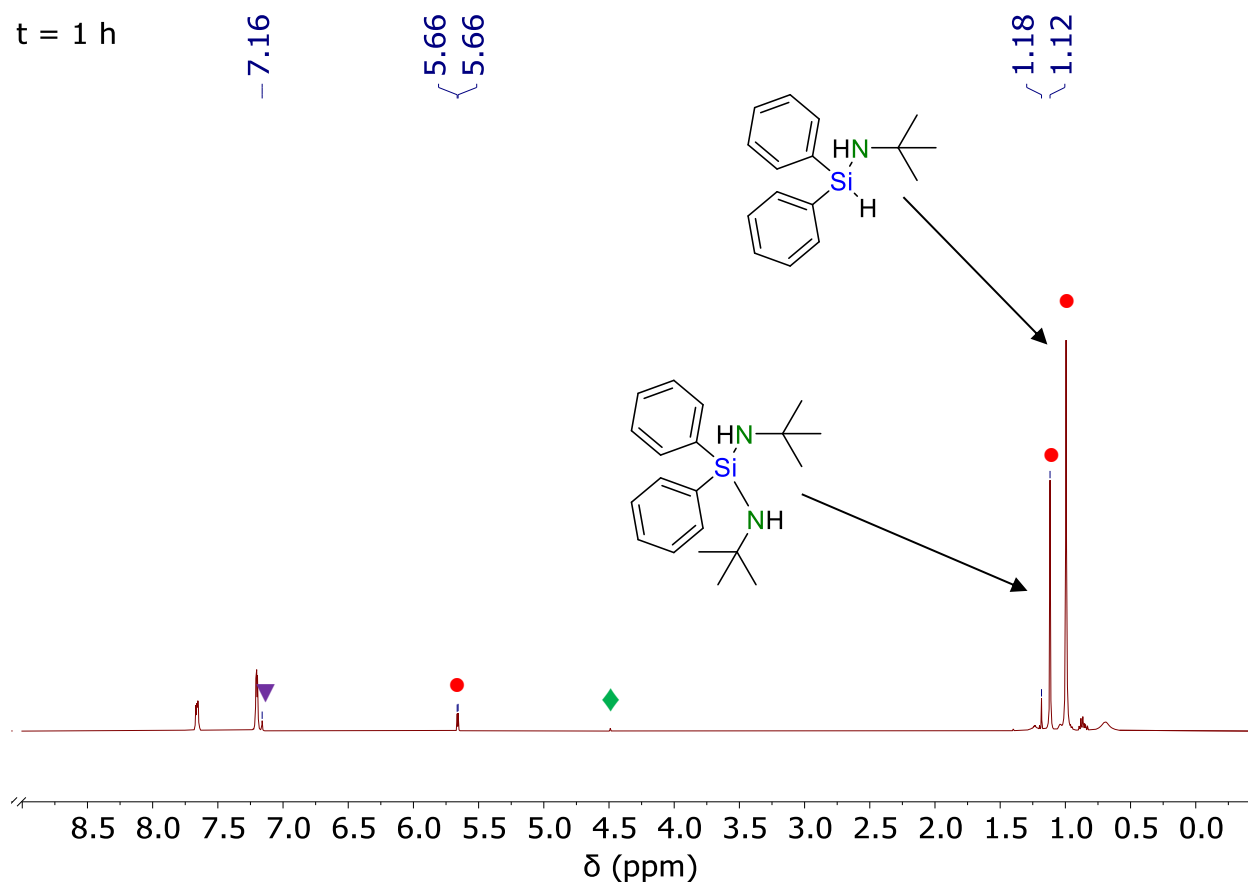

**Figure S3.29.** <sup>1</sup>H NMR spectrum of the reaction between Ph<sub>2</sub>SiH<sub>2</sub> and <sup>t</sup>BuNH<sub>2</sub> catalyzed by **1** in benzene-*d*<sub>6</sub> after 1 h.

t = 1 h

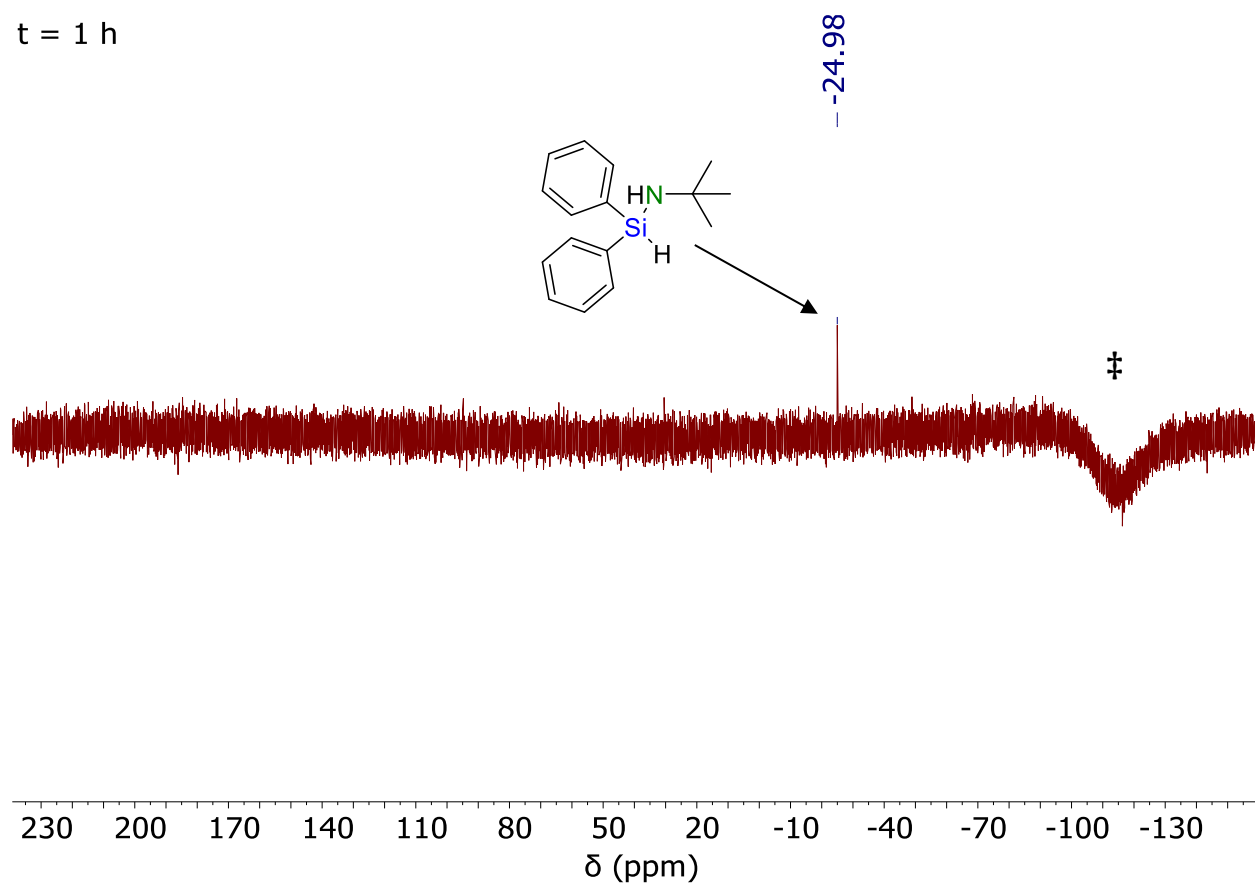

**Figure S3.30.**  $^{29}\text{Si}\{^1\text{H}\}$  NMR spectrum of the reaction between  $\text{Ph}_2\text{SiH}_2$  and  $t\text{BuNH}_2$  catalyzed by **1** in benzene- $d_6$  after 1 h.

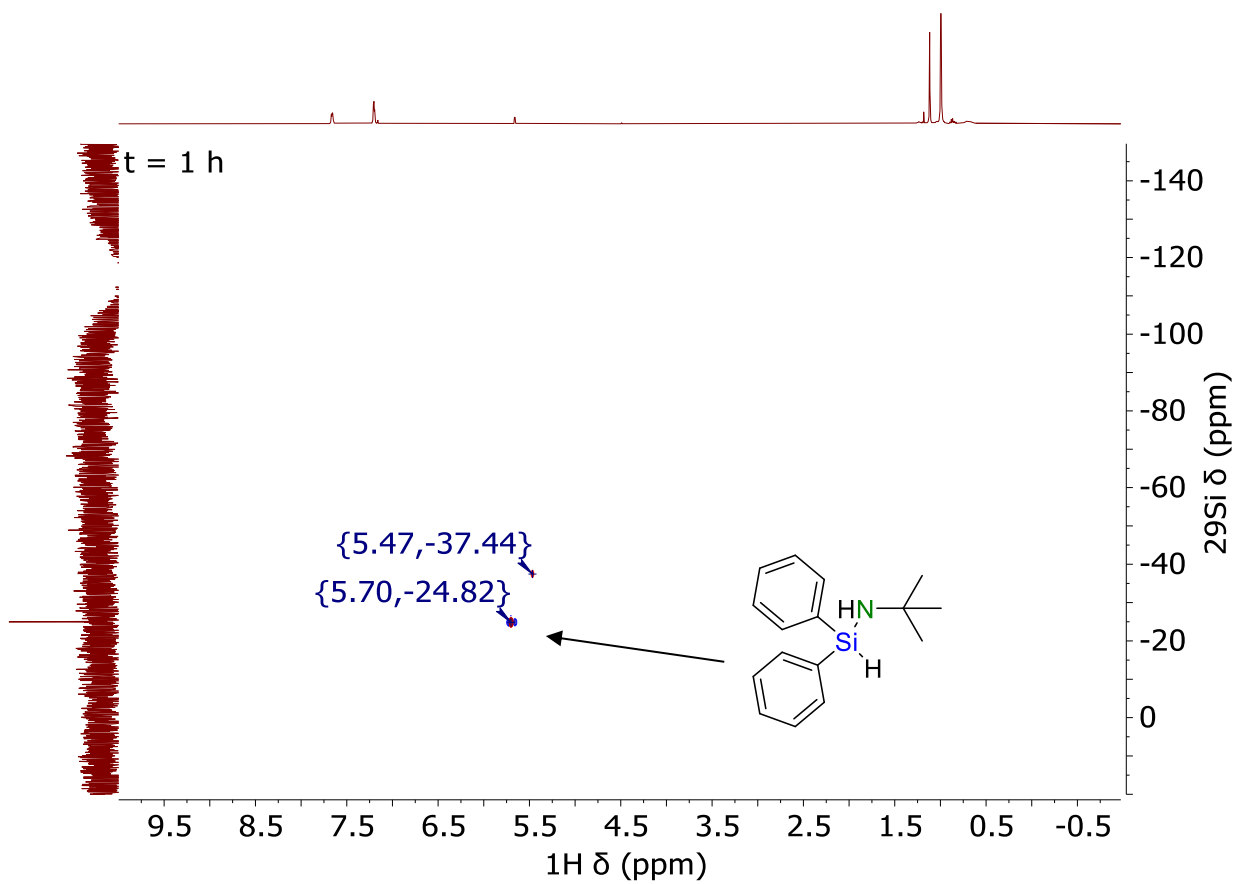

**Figure S3.31.**  $^1\text{H}$ - $^{29}\text{Si}\{^1\text{H}\}$  HSQC NMR spectrum of the reaction between  $\text{Ph}_2\text{SiH}_2$  and  $t\text{BuNH}_2$  catalyzed by **1** in benzene- $d_6$  after 1 h.



### S5.17. Ph<sub>2</sub>SiH<sub>2</sub> and 4.0 equiv. of PhNH<sub>2</sub>

Ph<sub>2</sub>SiH<sub>2</sub> (70.5 μL, 3.7 × 10<sup>-1</sup> mmol), PhNH<sub>2</sub> (137.5 μL, 15.2 × 10<sup>-1</sup> mmol, 4.0 equiv.), and **1** (16.5 μL, 3.7 × 10<sup>-1</sup> mmol, 2.3 M in hexanes, 10.0 mol %) were reacted together in 0.5 mL of benzene-*d*<sub>6</sub>. Complete consumption of Ph<sub>2</sub>SiH<sub>2</sub> was observed after 1 h. After 1 h at ambient temperature, Ph<sub>2</sub>SiH(NHPh) and Ph<sub>2</sub>Si(NHPh)<sub>2</sub> were formed in approximately 99% and 1% conversion. Spectra were consistent with previous reports of these compounds.<sup>6,7</sup>

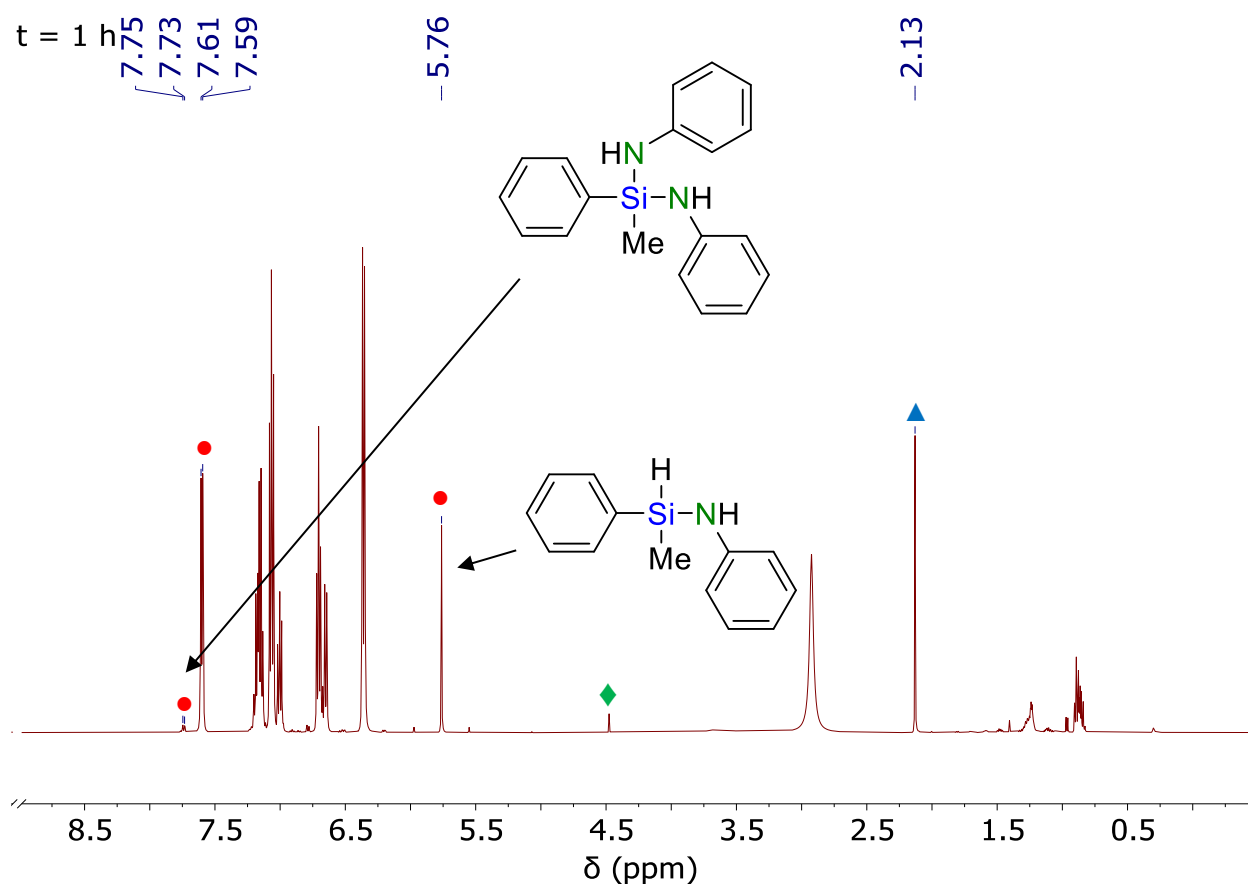

**Figure S3.32.** <sup>1</sup>H NMR spectrum of the reaction between Ph<sub>2</sub>SiH<sub>2</sub> and PhNH<sub>2</sub> catalyzed by **1** in benzene-*d*<sub>6</sub> after 1 h.

t = 1 h

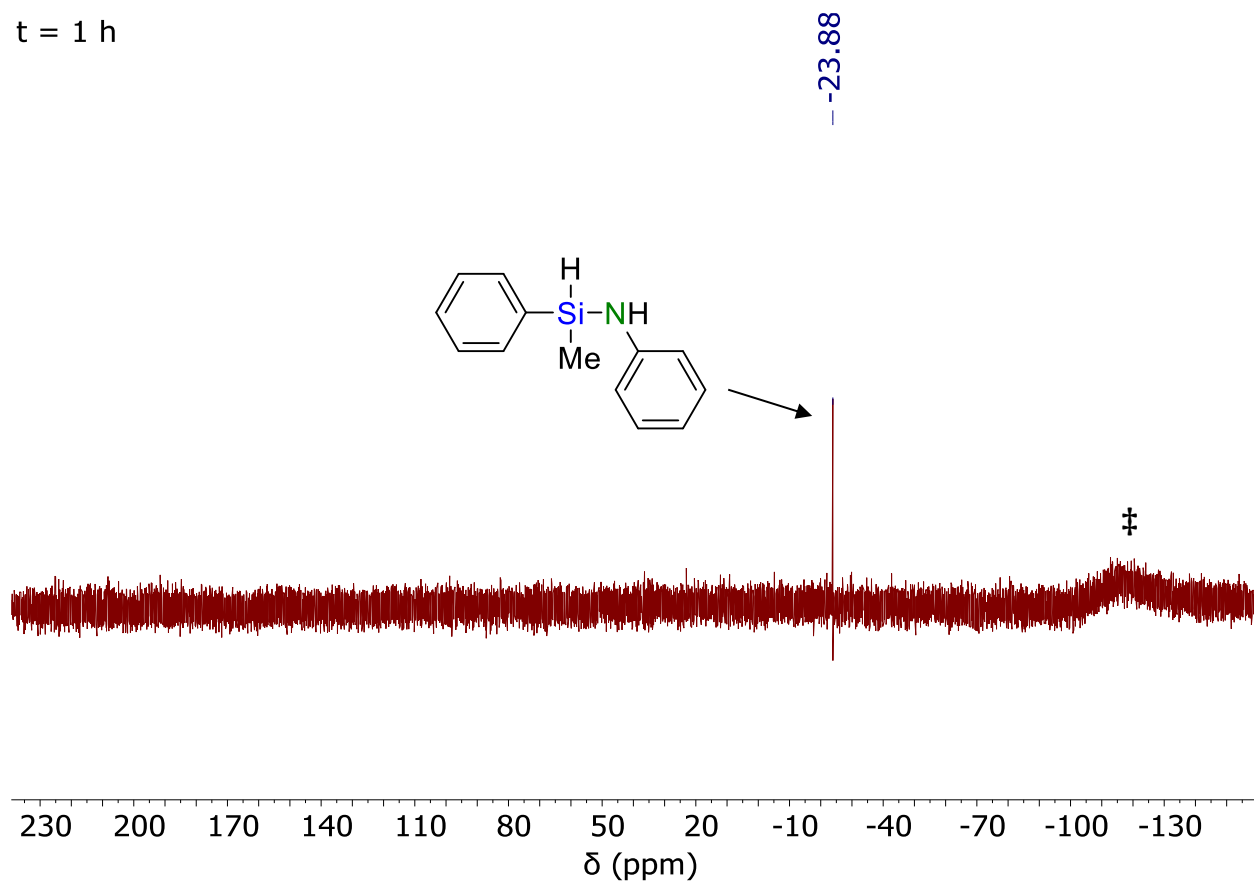

**Figure S3.33.**  $^{29}\text{Si}\{^1\text{H}\}$  NMR spectrum of the reaction between  $\text{Ph}_2\text{SiH}_2$  and  $\text{PhNH}_2$  catalyzed by **1** in benzene- $d_6$  after 1 h.

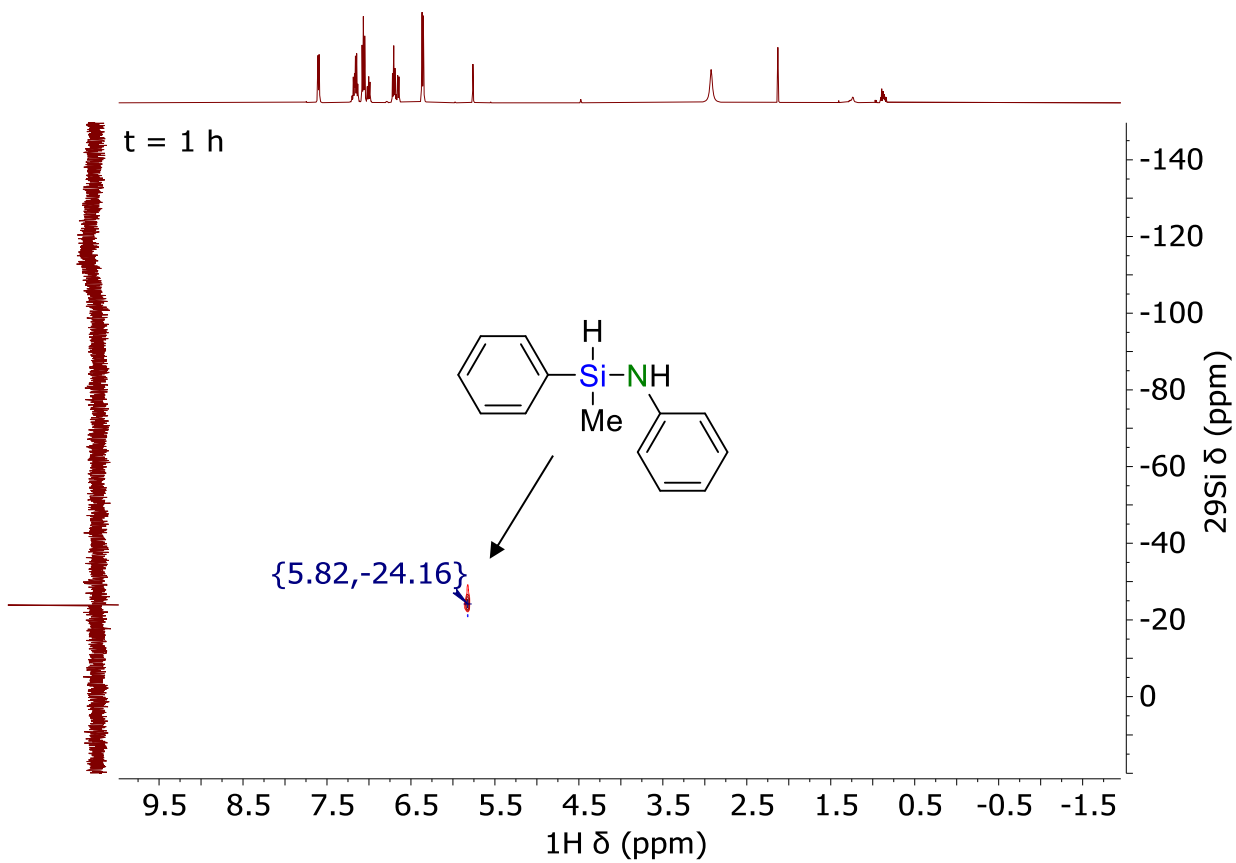

**Figure S3.34.**  $^1\text{H}$ - $^{29}\text{Si}\{^1\text{H}\}$  HSQC NMR spectrum of the reaction between  $\text{Ph}_2\text{SiH}_2$  and  $\text{PhNH}_2$  catalyzed by **1** in benzene- $d_6$  after 1 h.

### S5.18. Ph<sub>2</sub>SiH<sub>2</sub> and 4.0 equiv. of PyNH

Ph<sub>2</sub>SiH<sub>2</sub> (70.0 μL, 3.7 × 10<sup>-1</sup> mmol), PyNH (123.5 μL, 15.0 × 10<sup>-1</sup> mmol, 4.0 equiv.), and **1** (15.0 μL, 3.7 × 10<sup>-2</sup> mmol, 2.5 M in hexanes, 10.0 mol %) were reacted together in 0.5 mL of benzene-*d*<sub>6</sub>. Complete consumption of Ph<sub>2</sub>SiH<sub>2</sub> was observed after 0.5 h. The appearance of a diagnostic multiplet centered at δ = 3.10 in the <sup>1</sup>H NMR spectrum indicated 100% conversion to Ph<sub>2</sub>Si(NPy)<sub>2</sub> after 0.5 h at ambient temperature.

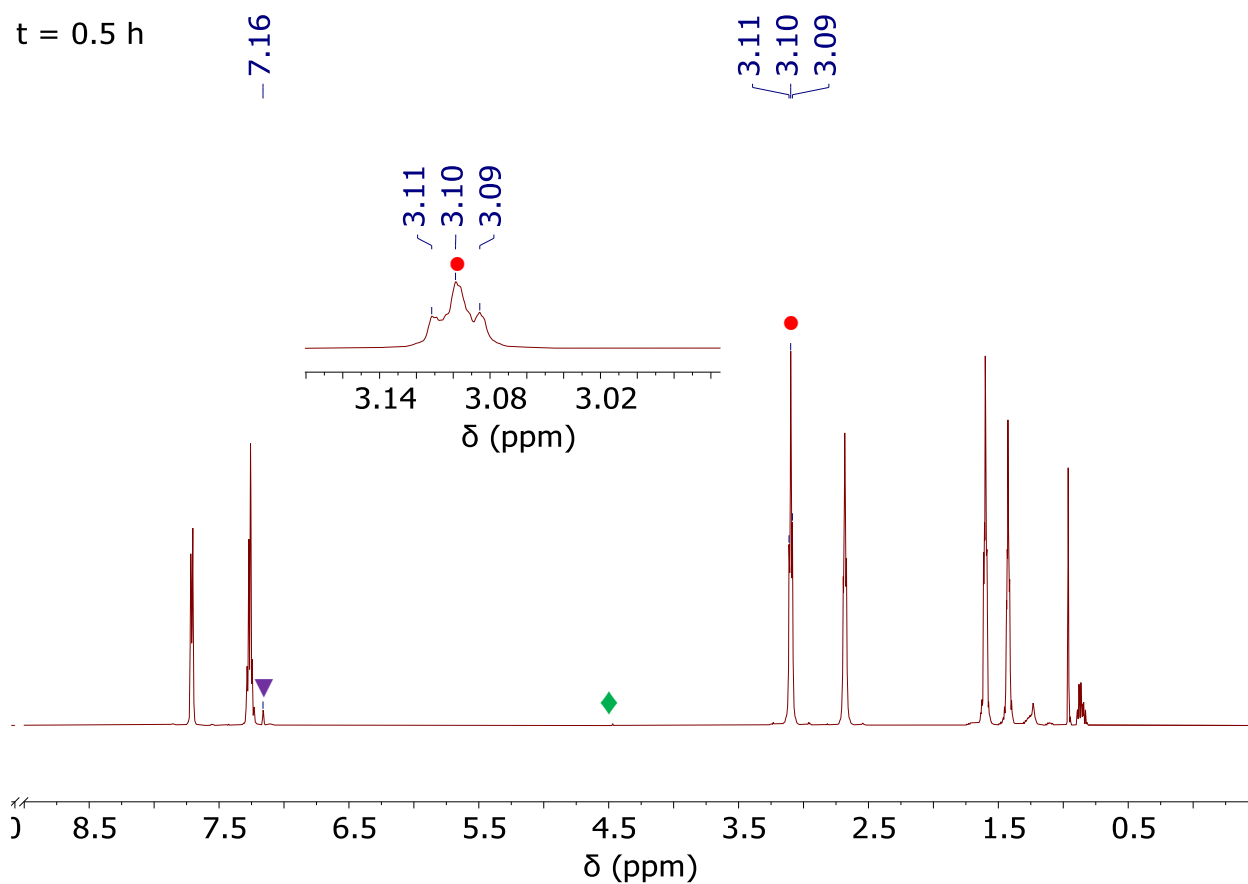

**Figure S3.35.** <sup>1</sup>H NMR spectrum of the reaction between Ph<sub>2</sub>SiH<sub>2</sub> and PyNH catalyzed by **1** in benzene-*d*<sub>6</sub> after 0.5 h.

### S5.19. Ph<sub>2</sub>SiH<sub>2</sub> and 4.0 equiv. of Et<sub>2</sub>NH

Ph<sub>2</sub>SiH<sub>2</sub> (70.0 μL, 3.7 × 10<sup>-1</sup> mmol), Et<sub>2</sub>NH (155.5 μL, 15.0 × 10<sup>-1</sup> mmol, 4.0 equiv.), and **1** (14.5 μL, 3.7 × 10<sup>-2</sup> mmol, 2.6 M in hexanes, 10.0 mol %) were reacted together in 0.5 mL of benzene-*d*<sub>6</sub>. Incomplete consumption of Ph<sub>2</sub>SiH<sub>2</sub> was observed after 1 h, as determined by the presence of the SiH peak at δ = 5.02 in the <sup>1</sup>H NMR spectrum. The appearance of a diagnostic quartet centered between δ = 2.89 and δ = 2.88 in the <sup>1</sup>H NMR spectrum indicated 69% conversion to Ph<sub>2</sub>SiH(NEt<sub>2</sub>) after 1 h at ambient temperature. The reaction was subsequently ended, due to the cessation of gas evolution. Spectra were consistent with previous reports of this compound.<sup>6</sup>

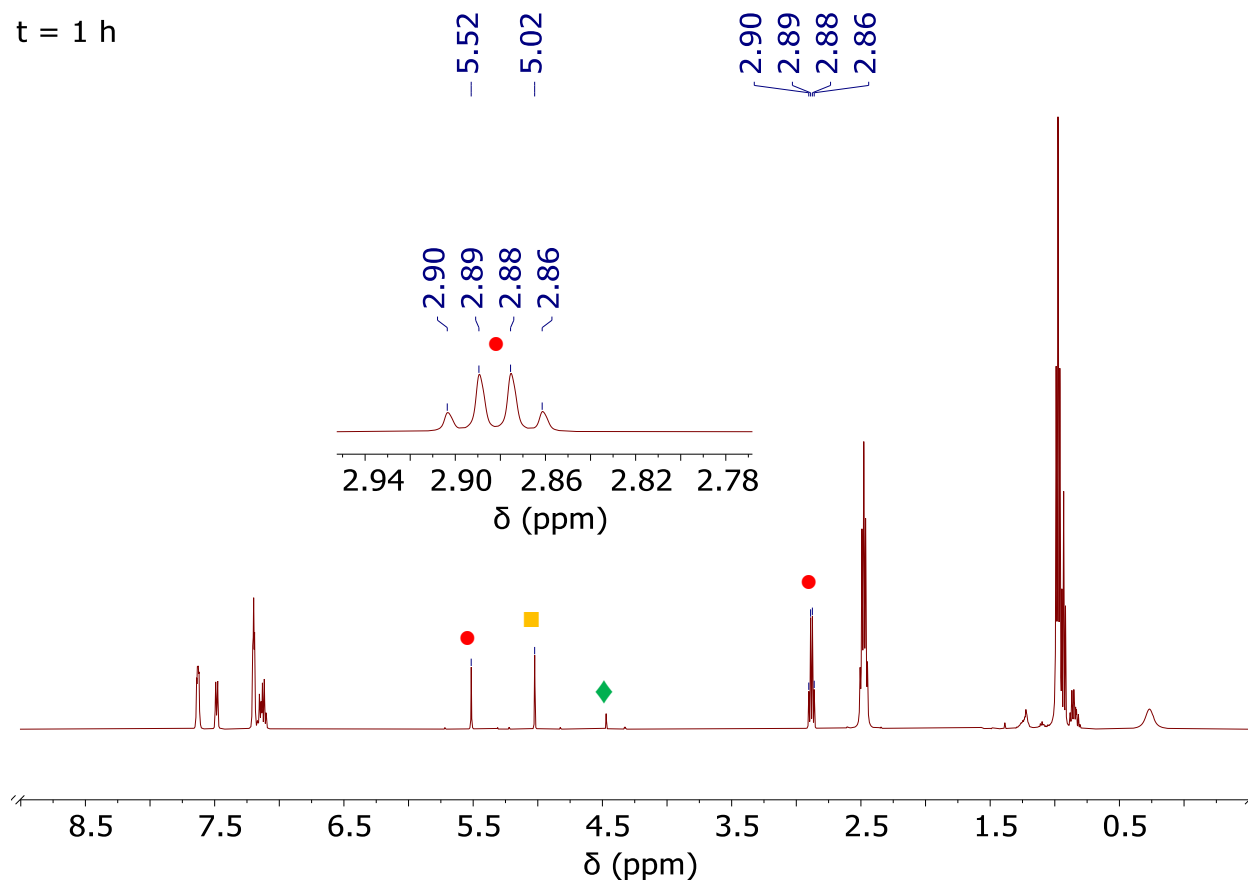

**Figure S3.36.** <sup>1</sup>H NMR spectrum of the reaction between Ph<sub>2</sub>SiH<sub>2</sub> and Et<sub>2</sub>NH catalyzed by **1** in benzene-*d*<sub>6</sub> after 1 h. Residual solvent is buried by aryl peaks.

t = 1 h

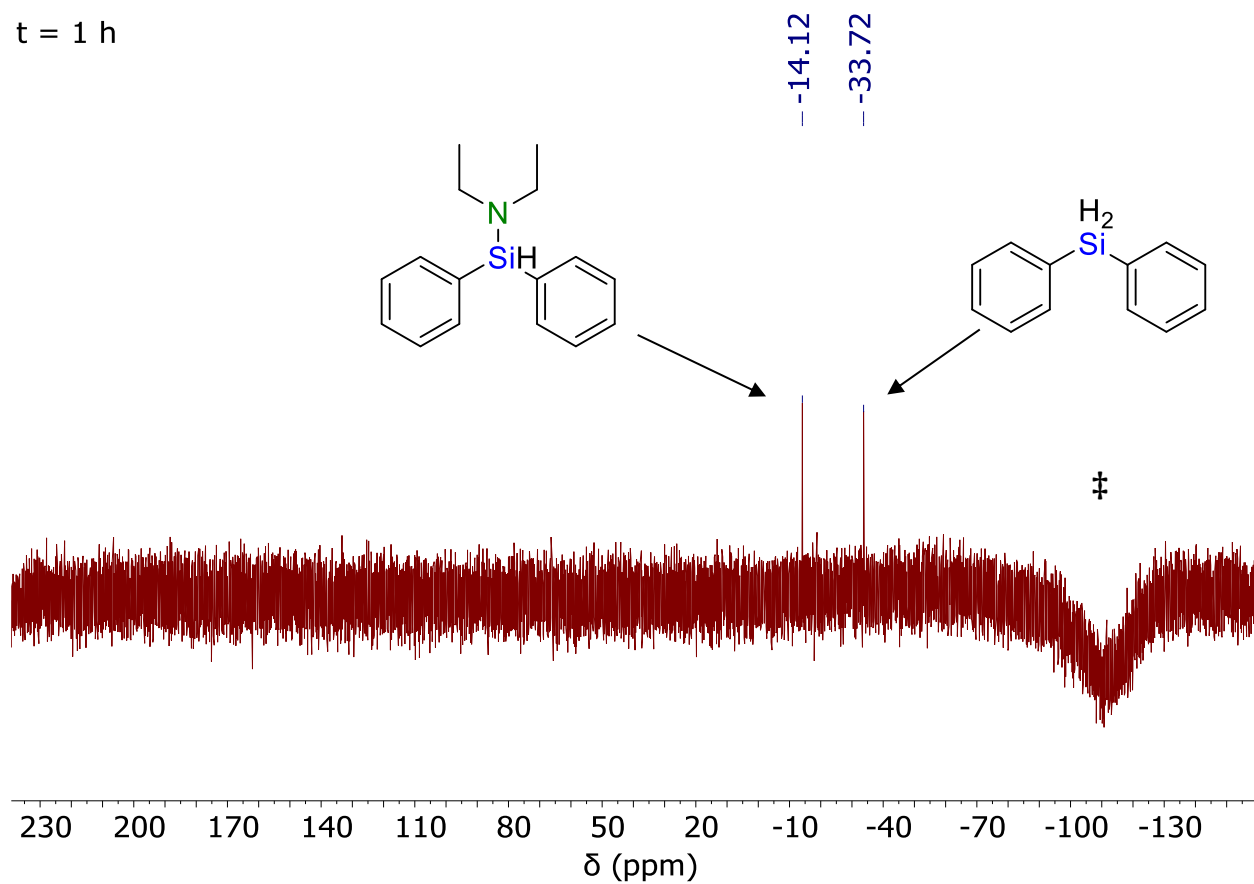

**Figure S3.37.**  $^{29}\text{Si}\{^1\text{H}\}$  NMR spectrum of the reaction between  $\text{Ph}_2\text{SiH}_2$  and  $\text{Et}_2\text{NH}$  catalyzed by **1** in benzene- $d_6$  after 1 h. The peak at  $\delta = -33.72$  is  $\text{Ph}_2\text{SiH}_2$ .

### S5.20. PhMe<sub>2</sub>SiH and 2.0 equiv. of <sup>n</sup>PrNH<sub>2</sub>

PhMe<sub>2</sub>SiH (57.5 μL, 3.7 × 10<sup>-1</sup> mmol), <sup>n</sup>PrNH<sub>2</sub> (61.5 μL, 7.5 × 10<sup>-1</sup> mmol, 2.0 equiv.), and **1** (14.5 μL, 3.7 × 10<sup>-2</sup> mmol, 2.6 M in hexanes, 10.0 mol %) were reacted together in 0.5 mL of benzene-*d*<sub>6</sub>. Complete consumption of PhMe<sub>2</sub>SiH was observed after 1 h, as determined by the disappearance of the SiH peak at δ = 4.60 in the <sup>1</sup>H NMR spectrum. The appearance of a broad, quartet centered between δ = 2.60 and δ = 2.59 in the <sup>1</sup>H NMR spectrum indicated 100% conversion to PhMe<sub>2</sub>Si(NH<sup>n</sup>Pr) after 1 h at ambient temperature.

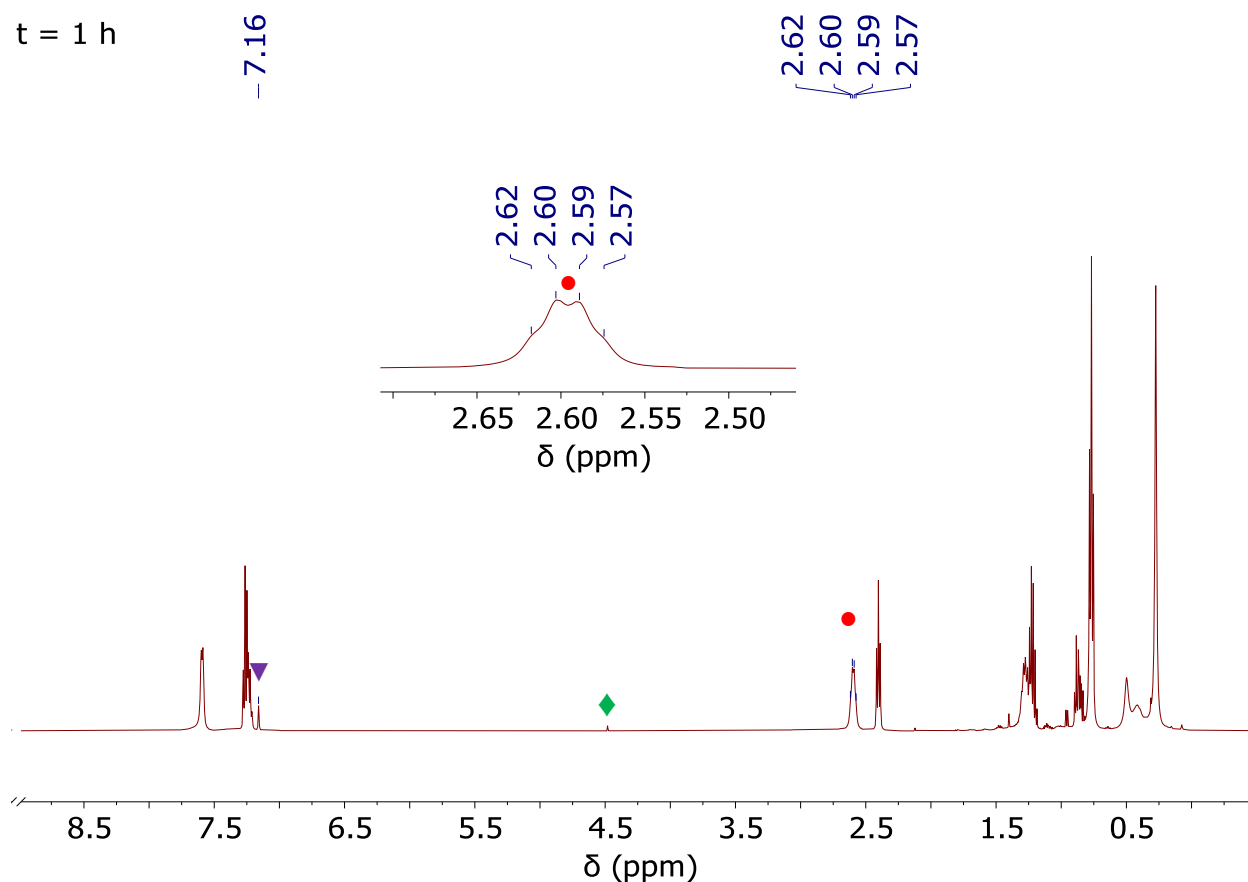

**Figure S3.38.** <sup>1</sup>H NMR spectrum of the reaction between PhMe<sub>2</sub>SiH and <sup>n</sup>PrNH<sub>2</sub> catalyzed by **1** in benzene-*d*<sub>6</sub> after 1 h.

### S5.21. PhMe<sub>2</sub>SiH and 2.0 equiv. of <sup>t</sup>PrNH<sub>2</sub>

PhMe<sub>2</sub>SiH (57.5 μL, 3.7 × 10<sup>-1</sup> mmol), <sup>t</sup>PrNH<sub>2</sub> (64.0 μL, 7.5 × 10<sup>-1</sup> mmol, 2.0 equiv.), and **1** (14.5 μL, 3.7 × 10<sup>-2</sup> mmol, 2.6 M in hexanes, 10.0 mol%) were reacted together in 0.5 mL of benzene-*d*<sub>6</sub>. Complete consumption of PhMe<sub>2</sub>SiH was observed after 1 h. The appearance of a diagnostic septet centered δ = 2.93 in the <sup>1</sup>H NMR spectrum, and a single peak at δ = -6.41 in the <sup>29</sup>Si{<sup>1</sup>H} NMR spectrum, indicated 100% conversion to PhMe<sub>2</sub>Si(NH<sup>t</sup>Pr) after 1 h at ambient temperature. Spectra were consistent with previous reports of this compound.<sup>9,11</sup>

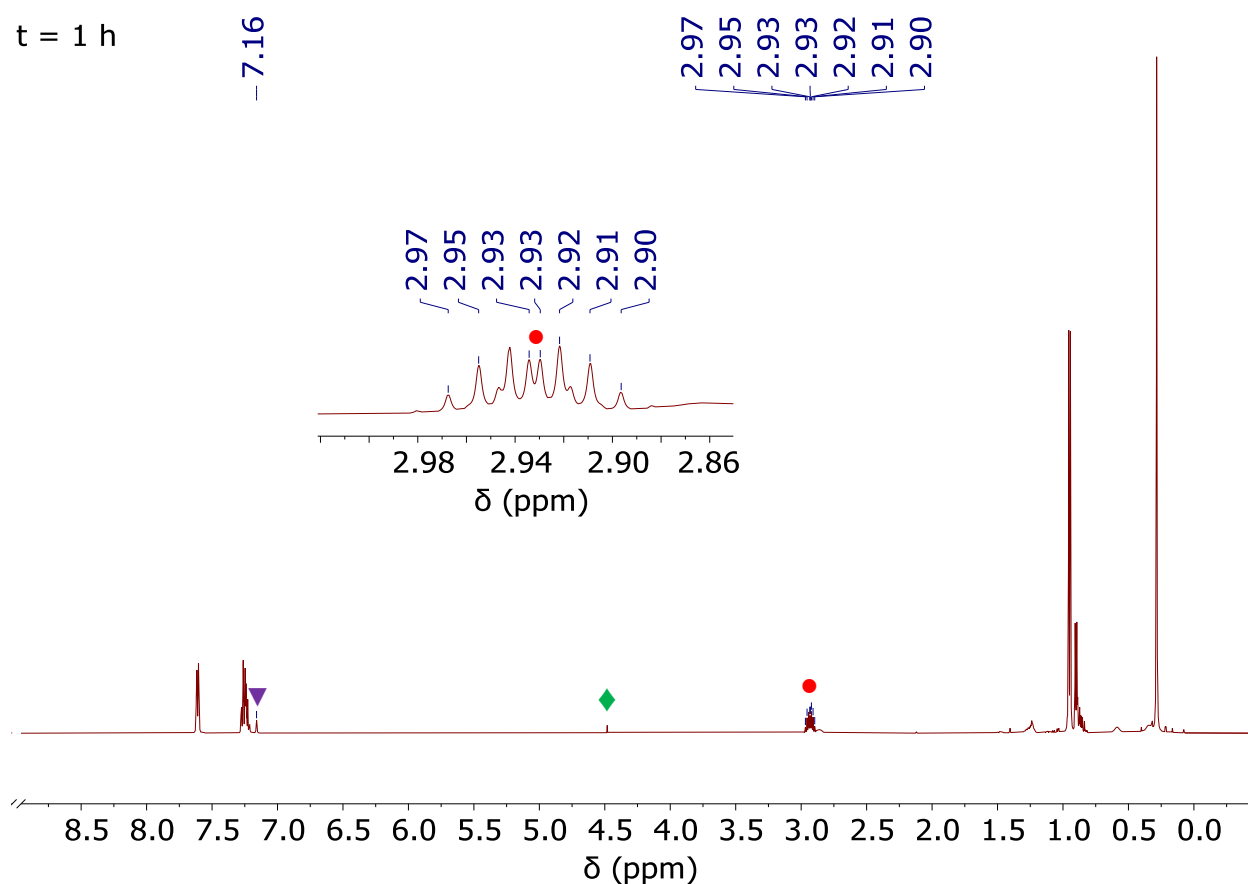

**Figure S3.39.** <sup>1</sup>H NMR spectrum of the reaction between PhMe<sub>2</sub>SiH and <sup>t</sup>PrNH<sub>2</sub> catalyzed by **1** in benzene-*d*<sub>6</sub> after 1 h.



t = 1 h

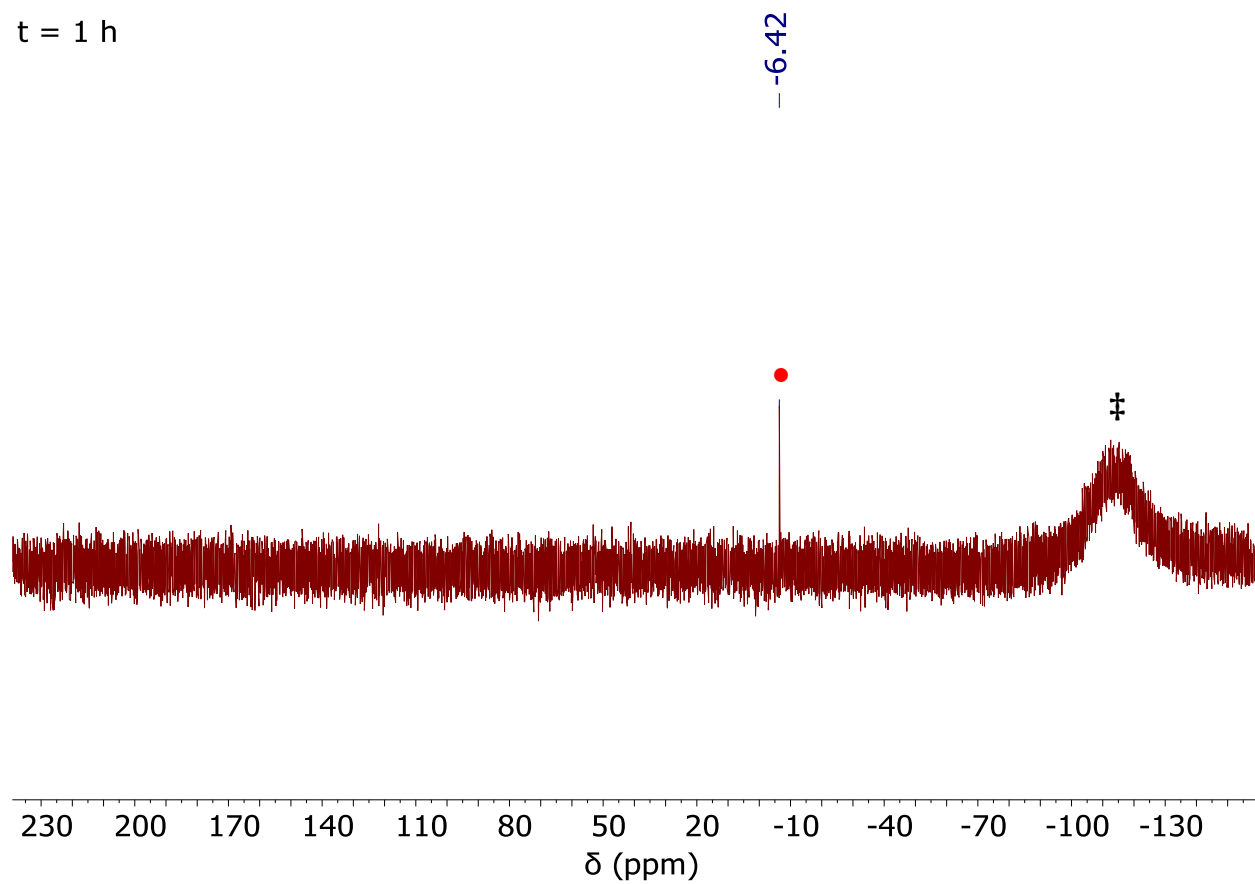

**Figure S3.40.**  $^{29}\text{Si}\{^1\text{H}\}$  NMR spectrum of the reaction between  $\text{PhMe}_2\text{SiH}$  and  $^i\text{PrNH}_2$  catalyzed by **1** in benzene- $d_6$  after 1 h.

### S5.22. PhMe<sub>2</sub>SiH and 2.0 equiv. of PhNH<sub>2</sub>

PhMe<sub>2</sub>SiH (58.0 μL, 3.7 × 10<sup>-1</sup> mmol), PhNH<sub>2</sub> (68.5 μL, 7.5 × 10<sup>-1</sup> mmol, 2.0 equiv.), and **1** (16.5 μL, 3.7 × 10<sup>-2</sup> mmol, 2.3 M in hexanes, 10.0 mol %) were reacted together in 0.5 mL of benzene-*d*<sub>6</sub>. After 1 h, no reaction occurred.

t = 1 h

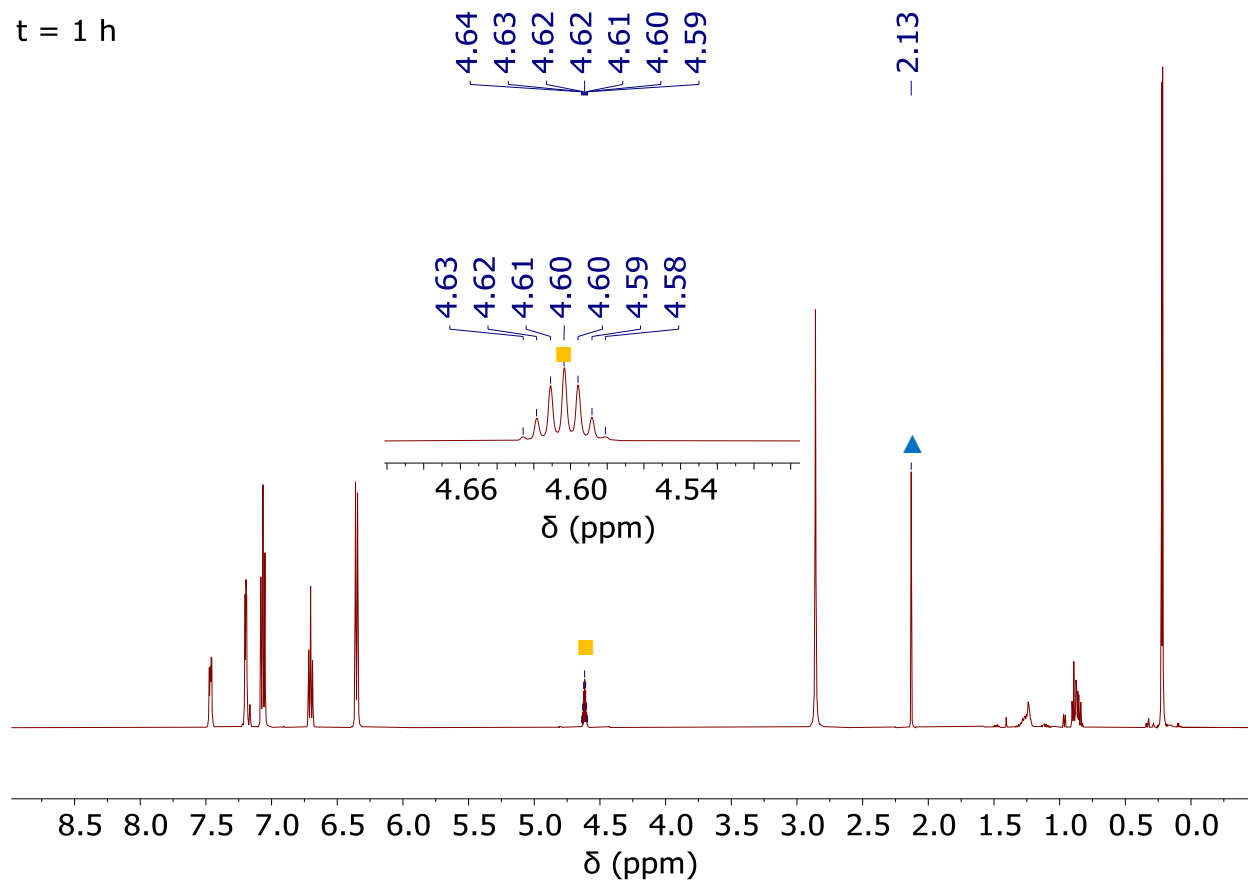

**Figure S3.41.** <sup>1</sup>H NMR spectrum of the reaction between PhMe<sub>2</sub>SiH and PhNH<sub>2</sub> catalyzed by **1** in benzene-*d*<sub>6</sub> after 1 h.

### S5.24. PhMe<sub>2</sub>SiH and 2.0 equiv. of Et<sub>2</sub>NH

PhMe<sub>2</sub>SiH (57.5  $\mu$ L,  $3.7 \times 10^{-1}$  mmol), Et<sub>2</sub>NH (77.5  $\mu$ L,  $7.5 \times 10^{-1}$  mmol, 2.0 equiv.), and **1** (14.5  $\mu$ L,  $3.7 \times 10^{-2}$  mmol, 2.6 M in hexanes, 10.0 mol %) were reacted together in 0.5 mL of benzene-*d*<sub>6</sub>. Incomplete consumption of PhMe<sub>2</sub>SiH was observed after 1 h, as determined by the presence of the SiH peak at  $\delta = 4.59$  in the <sup>1</sup>H NMR spectrum. The appearance of a diagnostic quartet centered between  $\delta = 2.78$  and  $\delta = 2.77$  in the <sup>1</sup>H NMR spectrum indicated 48% conversion to PhMe<sub>2</sub>Si(NEt<sub>2</sub>) after 1 h at ambient temperature. The reaction was ended after 1 h, due to the cessation of gas evolution. Spectroscopic data was consistent with previous reports of this compound.<sup>12</sup>

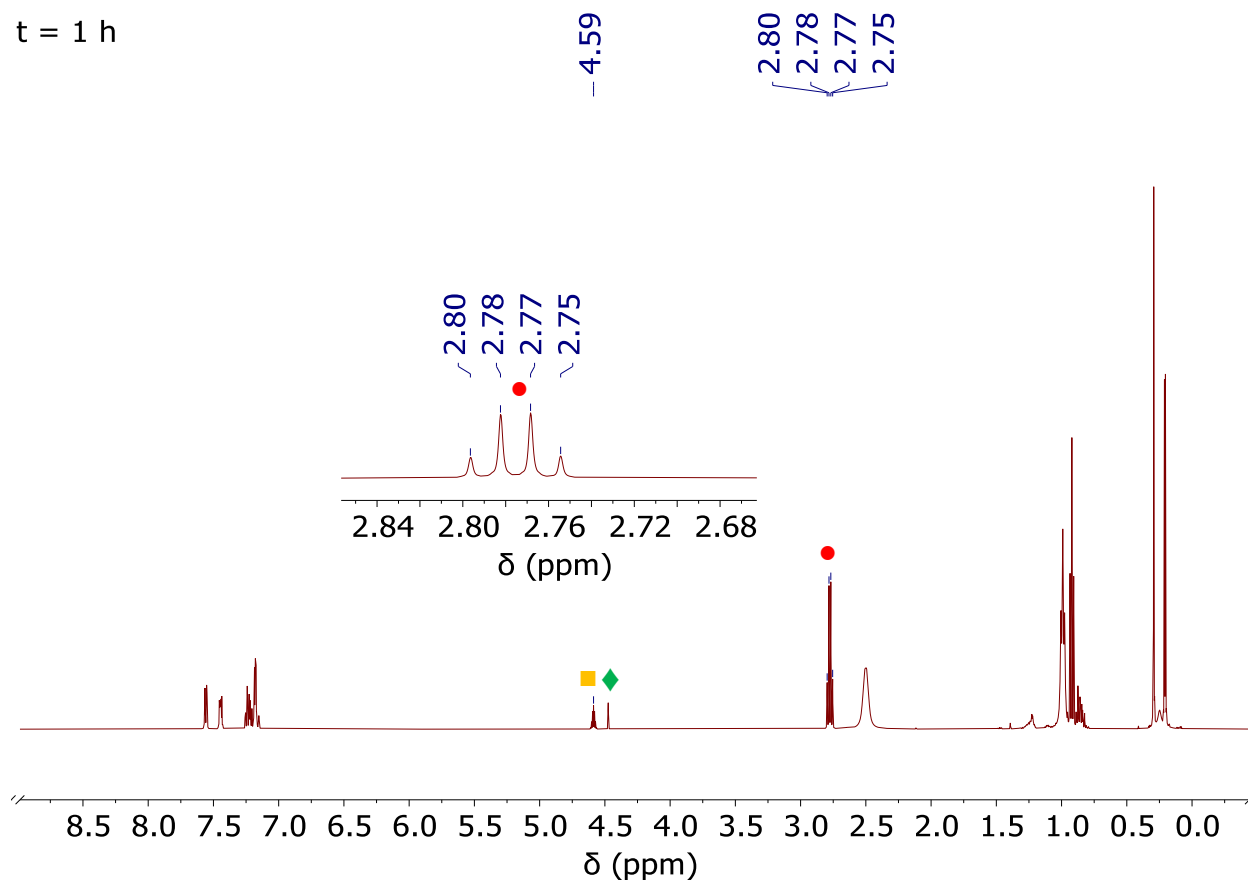

**Figure S3.42.** <sup>1</sup>H NMR spectrum of the reaction between PhMe<sub>2</sub>SiH and Et<sub>2</sub>NH catalyzed by **1** in benzene-*d*<sub>6</sub> after 1 h. Residual solvent is buried by aryl peaks.

t = 1 h

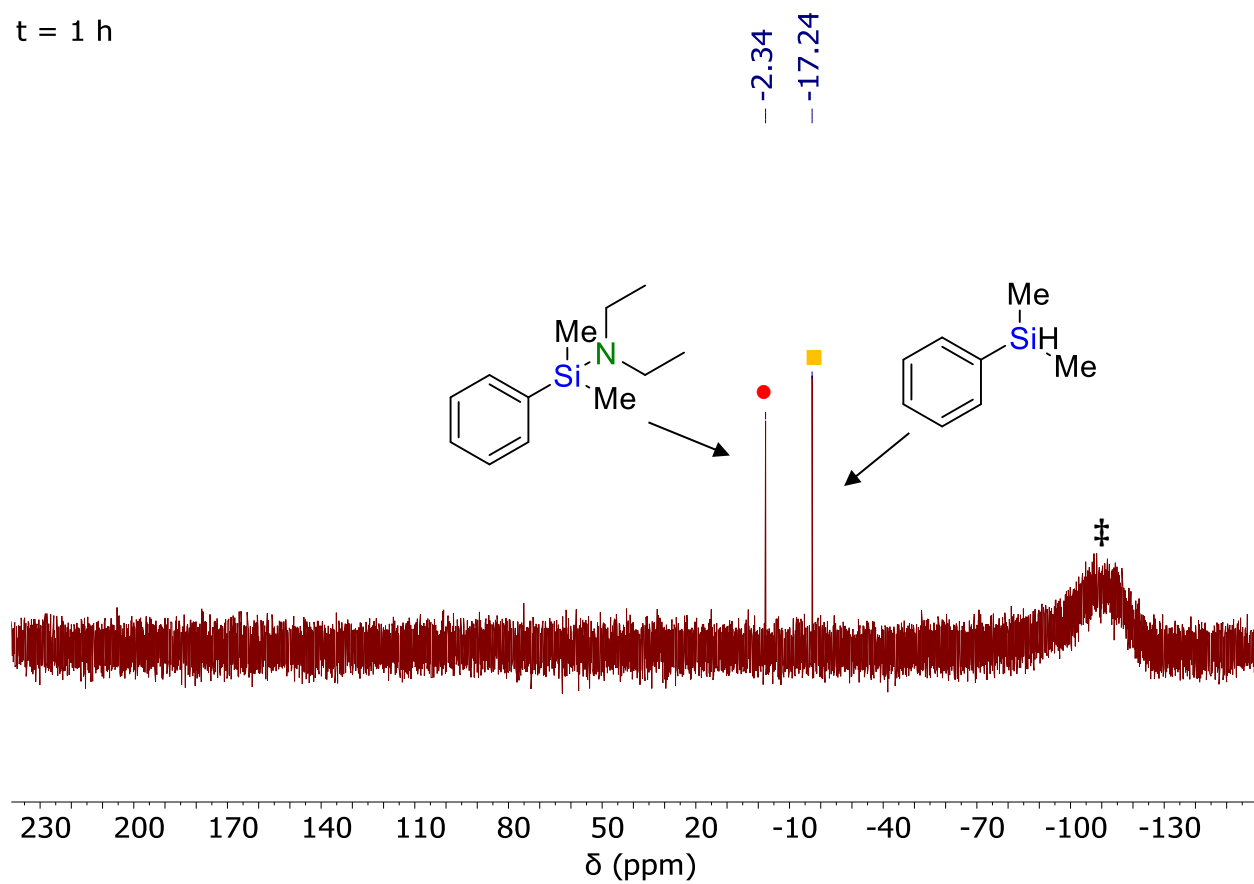

**Figure S3.43.**  $^{29}\text{Si}\{^1\text{H}\}$  NMR spectrum of the reaction between  $\text{PhMe}_2\text{SiH}$  and  $\text{Et}_2\text{NH}$  catalyzed by **1** in benzene- $d_6$  after 1 h.

### S5.26. Ph<sub>2</sub>MeSiH and 2.0 equiv. of Et<sub>2</sub>NH

Ph<sub>2</sub>MeSiH (75.0 μL, 3.7 × 10<sup>-1</sup> mmol), Et<sub>2</sub>NH (78.0 μL, 7.5 × 10<sup>-1</sup> mmol, 2.0 equiv.), and **1** (14.5 μL, 3.7 × 10<sup>-2</sup> mmol, 2.6 M in hexanes, 10.0 mol%) were reacted together in 0.5 mL of benzene-*d*<sub>6</sub>. Incomplete consumption of Ph<sub>2</sub>MeSiH was observed after 1 h, as determined by the presence of the SiH peak at δ = 5.10 in the <sup>1</sup>H NMR spectrum. The appearance of a multiplet centered between δ = 2.86 and δ = 2.85 in the <sup>1</sup>H NMR spectrum indicated 57% conversion to Ph<sub>2</sub>MeSi(NEt<sub>2</sub>) after 1 h at ambient temperature, which was supported by the presence of a peak at δ = -7.15 in the <sup>29</sup>Si{<sup>1</sup>H} NMR spectrum. The reaction was ended after 1 h, due to the slow progression of gas evolution. Spectroscopic data was consistent with previous reports of this compound.<sup>13,14</sup>

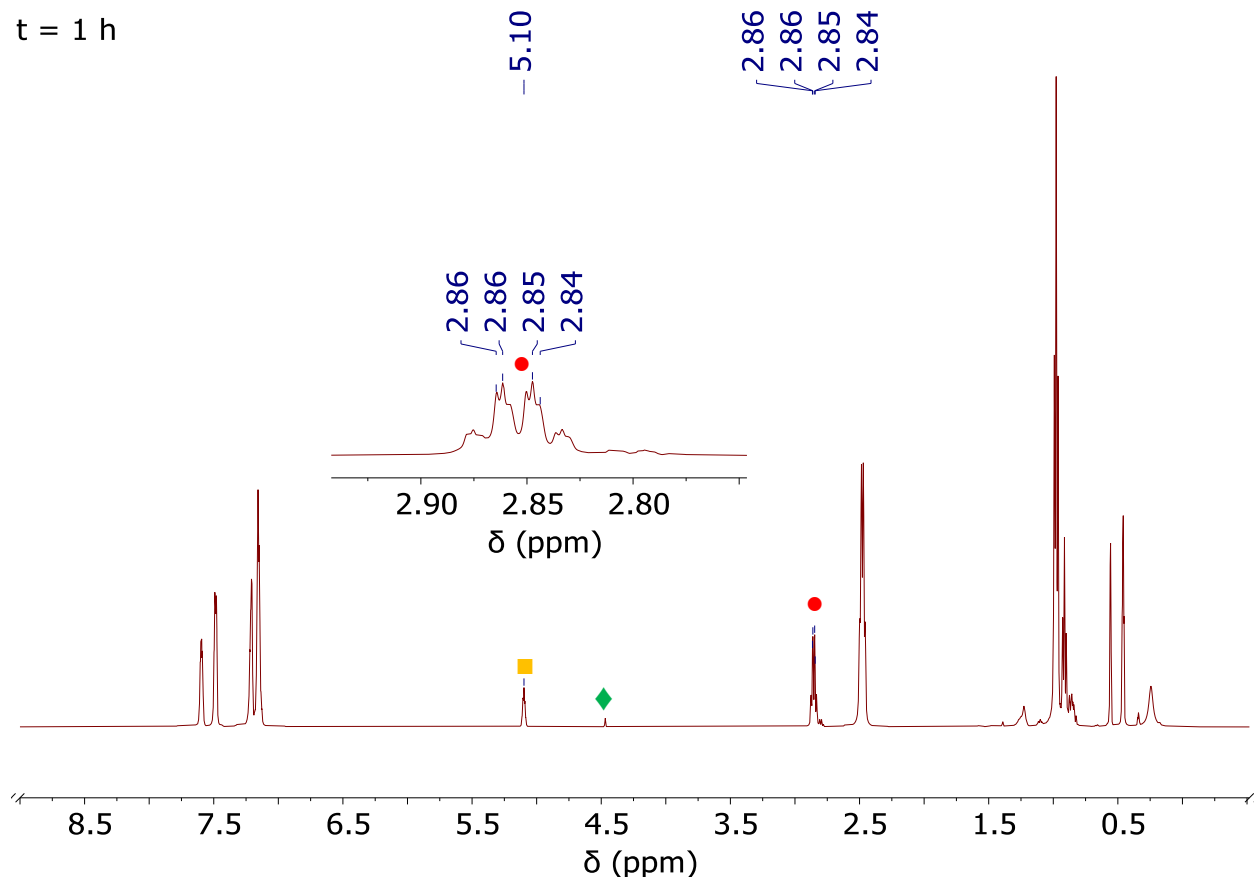

**Figure S3.44.** <sup>1</sup>H NMR spectrum of the reaction between Ph<sub>2</sub>MeSiH and Et<sub>2</sub>NH catalyzed by **1** in benzene-*d*<sub>6</sub> after 1 h. Residual solvent is buried by aryl peaks.

t = 1 h

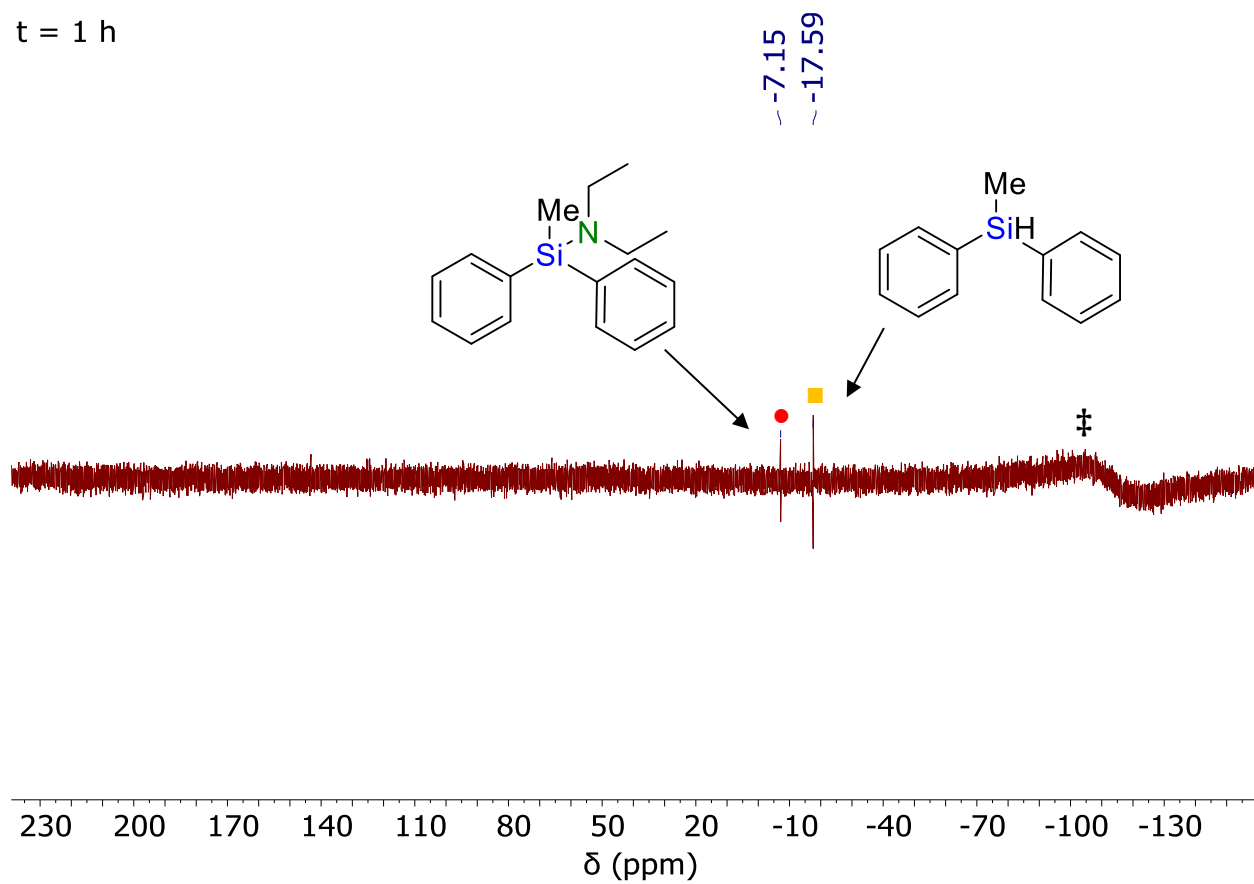

**Figure S3.45.**  $^{29}\text{Si}\{^1\text{H}\}$  NMR spectrum of the reaction between  $\text{Ph}_2\text{MeSiH}$  and  $\text{Et}_2\text{NH}$  catalyzed by **1** in benzene- $d_6$  after 1 h.

### S5.27. Ph<sub>3</sub>SiH and 2.0 equiv. of <sup>n</sup>PrNH<sub>2</sub>

Ph<sub>3</sub>SiH (98.0 mg, 3.7 × 10<sup>-1</sup> mmol), <sup>n</sup>PrNH<sub>2</sub> (62.0 μL, 7.5 × 10<sup>-1</sup> mmol, 2.0 equiv.), and **1** (14.5 μL, 3.7 × 10<sup>-2</sup> mmol, 2.6 M in hexanes, 10.0 mol %) were reacted together in 0.5 mL of benzene-*d*<sub>6</sub> in the presence of C<sub>6</sub>Me<sub>6</sub> standard (52.5 μL, 0.4 M in benzene-*d*<sub>6</sub>). Complete consumption of Ph<sub>3</sub>SiH was observed after 1 h, as determined by the disappearance of the SiH peak at δ = 5.69 in the <sup>1</sup>H NMR spectrum. The appearance of a diagnostic quartet centered between δ = 2.80 and δ = 2.79, and a single peak in the <sup>29</sup>Si{<sup>1</sup>H} NMR spectrum at δ = -16.46, indicated 100% conversion to Ph<sub>3</sub>Si(NH<sup>n</sup>Pr) after 1 h at ambient temperature. Spectra were consistent with previous reports of this compound.<sup>6</sup>

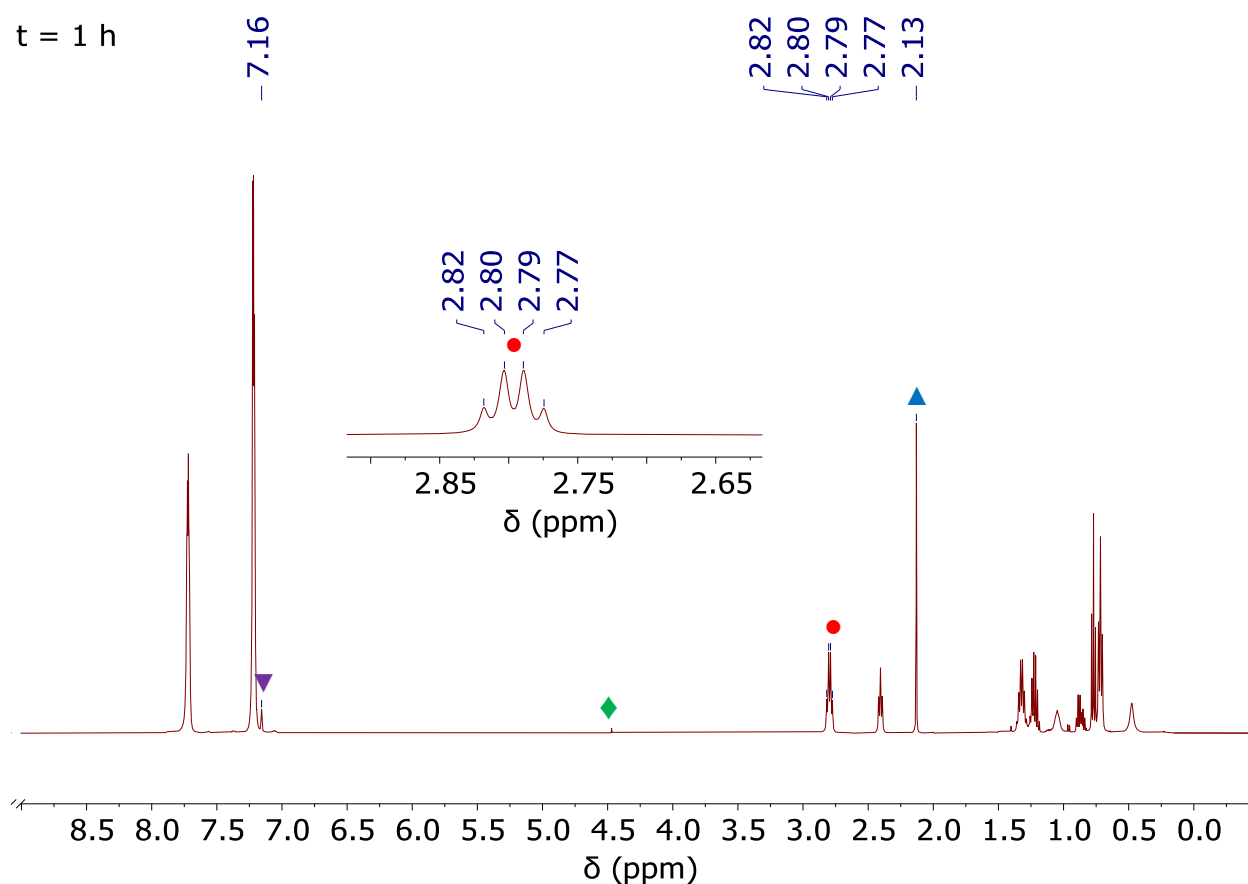

**Figure S3.46.** <sup>1</sup>H NMR spectrum of the reaction between Ph<sub>3</sub>SiH and <sup>n</sup>PrNH<sub>2</sub> catalyzed by **1** in benzene-*d*<sub>6</sub> after 1 h.

t = 1 h

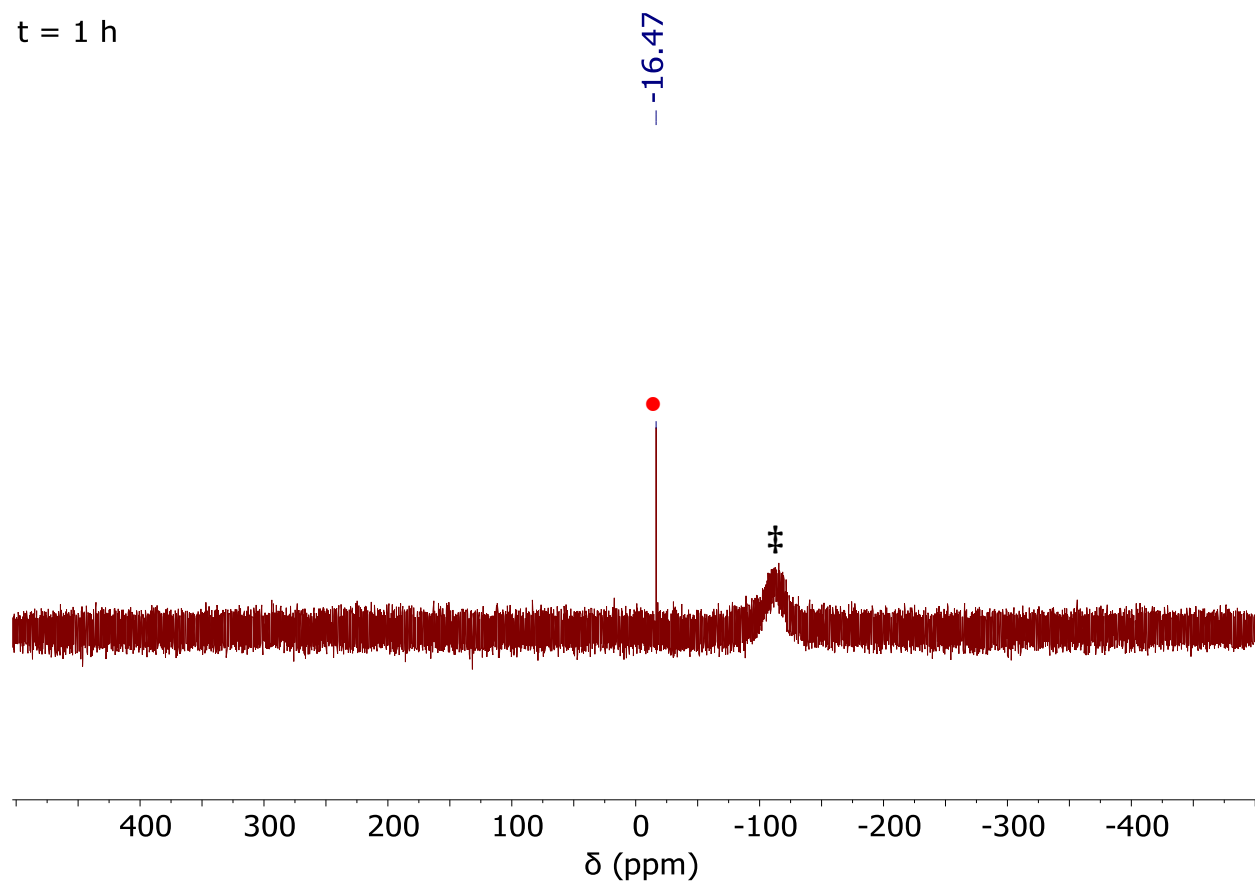

**Figure S3.47.**  $^{29}\text{Si}\{^1\text{H}\}$  NMR spectrum of the reaction between  $\text{Ph}_3\text{SiH}$  and  $^i\text{PrNH}_2$  catalyzed by **1** in benzene- $d_6$  after 1 h.



### S5.28. Ph<sub>3</sub>SiH and 2.0 equiv. of <sup>t</sup>PrNH<sub>2</sub>

Ph<sub>3</sub>SiH (98.0 mg,  $3.7 \times 10^{-1}$  mmol), <sup>t</sup>PrNH<sub>2</sub> (64.5  $\mu$ L,  $7.5 \times 10^{-1}$  mmol, 2.0 equiv.), and **1** (14.5  $\mu$ L,  $3.7 \times 10^{-2}$  mmol, 2.6 M in hexanes, 10.0 mol %) were reacted together in 0.5 mL of benzene-*d*<sub>6</sub> in the presence of C<sub>6</sub>Me<sub>6</sub> standard (52.5  $\mu$ L, 0.4 M in benzene-*d*<sub>6</sub>). Complete consumption of Ph<sub>3</sub>SiH was observed after 1 h. The appearance of a diagnostic septet centered between  $\delta = 3.15$ -3.14 in the <sup>1</sup>H NMR spectrum, and a single peak in the <sup>29</sup>Si{<sup>1</sup>H} NMR spectrum at  $\delta = -17.85$ , indicated 100% conversion to Ph<sub>3</sub>Si(NH<sup>t</sup>Pr) after 1 h at ambient temperature. Spectra were consistent with previous reports of this compound.<sup>6</sup>

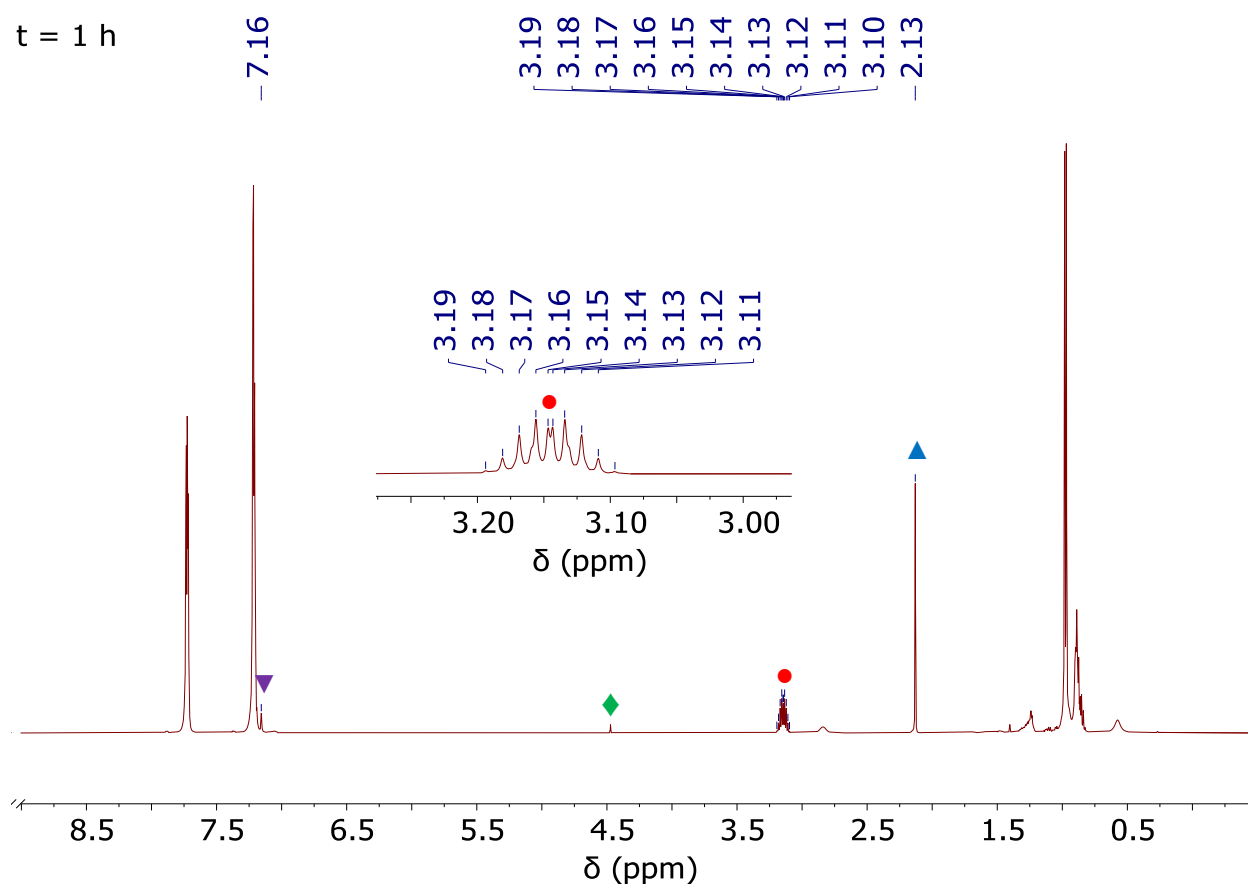

**Figure S3.48.** <sup>1</sup>H NMR spectrum of the reaction between Ph<sub>3</sub>SiH and <sup>t</sup>PrNH<sub>2</sub> catalyzed by **1** in benzene-*d*<sub>6</sub> after 1 h.

t = 1 h

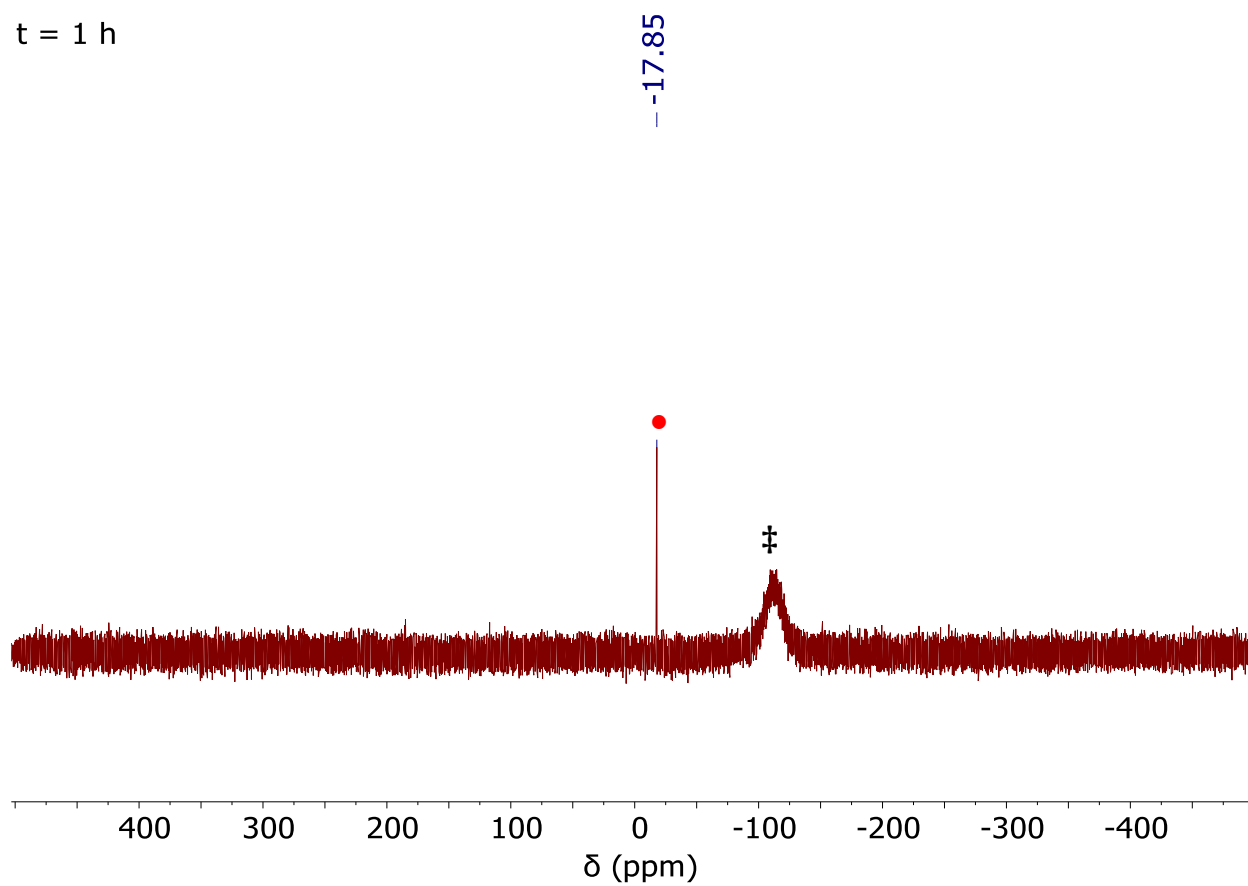

**Figure S3.49.**  $^{29}\text{Si}\{^1\text{H}\}$  NMR spectrum of the reaction between  $\text{Ph}_3\text{SiH}$  and  $\text{PrNH}_2$  catalyzed by **1** in benzene- $d_6$  after 1 h.

### S5.29. Ph<sub>3</sub>SiH and 2.0 equiv. of <sup>n</sup>BuNH<sub>2</sub>

Ph<sub>3</sub>SiH (98.0 mg,  $3.7 \times 10^{-1}$  mmol), <sup>n</sup>BuNH<sub>2</sub> (75.0  $\mu$ L,  $7.5 \times 10^{-1}$  mmol, 2.0 equiv.), and **1** (14.5  $\mu$ L,  $3.7 \times 10^{-2}$  mmol, 2.6 M in hexanes, 10.0 mol %) were reacted together in 0.5 mL of benzene-*d*<sub>6</sub> in the presence of C<sub>6</sub>Me<sub>6</sub> standard (52.5  $\mu$ L, 0.4 M in benzene-*d*<sub>6</sub>). Complete consumption of Ph<sub>3</sub>SiH was observed after 1 h. The appearance of a diagnostic quartet centered between  $\delta = 2.86$  and  $\delta = 2.84$  in the <sup>1</sup>H NMR spectrum, and a single peak in the <sup>29</sup>Si{<sup>1</sup>H} NMR spectrum at  $\delta = -16.50$ , indicated 100% conversion to Ph<sub>3</sub>Si(NH<sup>n</sup>Bu) after 1 h at ambient temperature. Spectra were consistent with previous reports of this compound.<sup>15</sup>

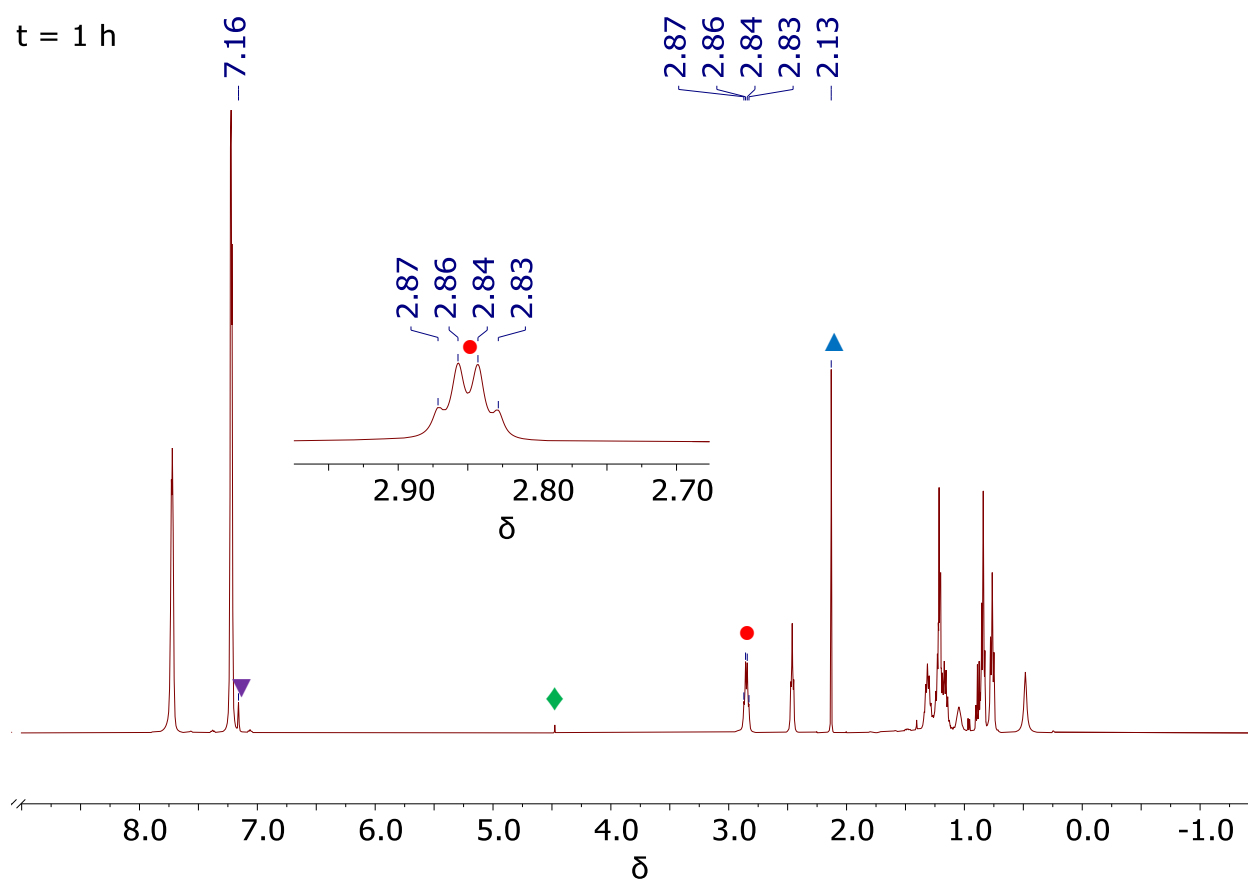

**Figure S3.50.** <sup>1</sup>H NMR spectrum of the reaction between Ph<sub>3</sub>SiH and <sup>n</sup>BuNH<sub>2</sub> catalyzed by **1** in benzene-*d*<sub>6</sub> after 1 h.

t = 1 h

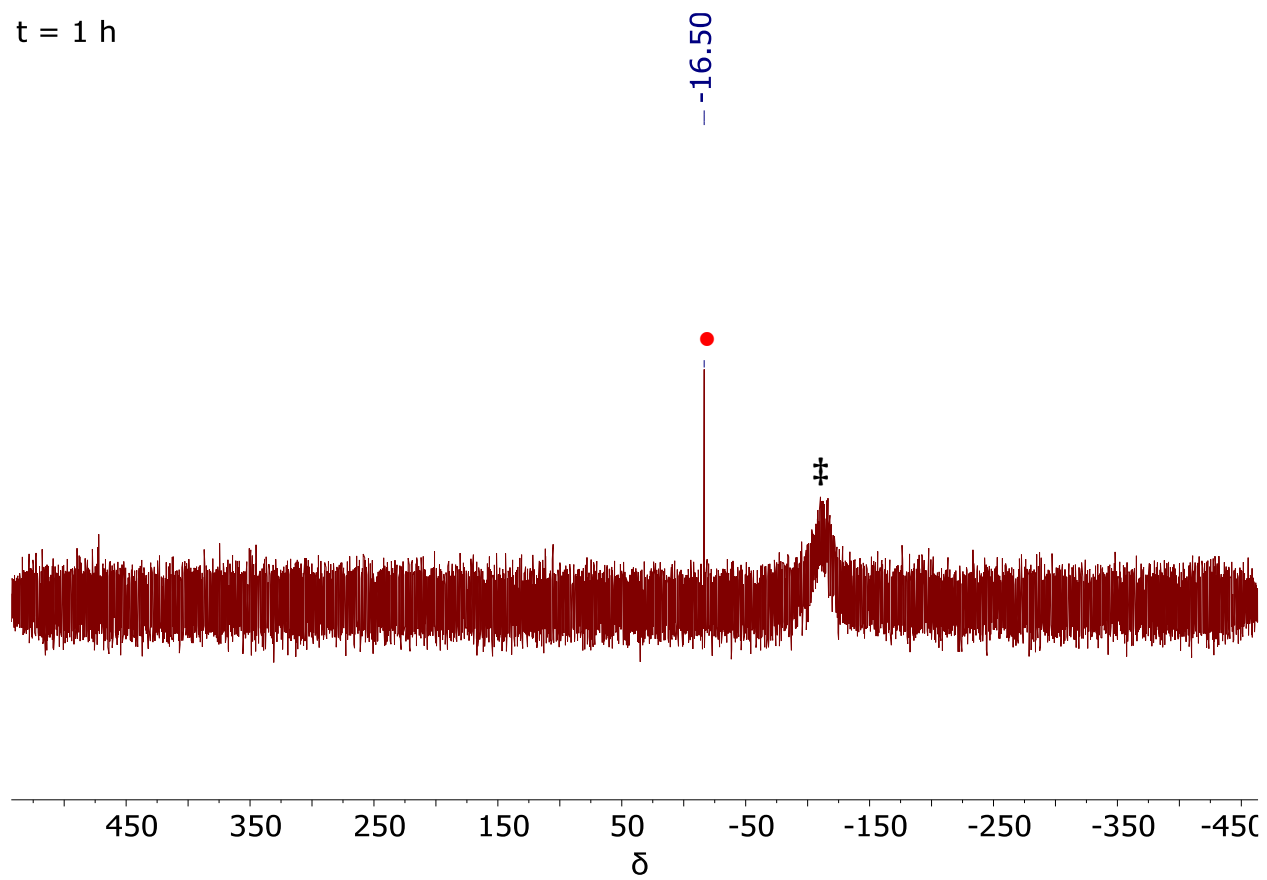

**Figure S3.51.**  $^{29}\text{Si}\{^1\text{H}\}$  NMR spectrum of the reaction between  $\text{Ph}_3\text{SiH}$  and  $t\text{BuNH}_2$  catalyzed by **1** in benzene- $d_6$  after 1 h.

### S5.30. Ph<sub>3</sub>SiH and 2.0 equiv. of <sup>t</sup>BuNH<sub>2</sub>

Ph<sub>3</sub>SiH (98.0 mg,  $3.7 \times 10^{-1}$  mmol), <sup>t</sup>BuNH<sub>2</sub> (79.5  $\mu$ L,  $7.5 \times 10^{-1}$  mmol, 2.0 equiv.), and **1** (15.0  $\mu$ L,  $3.7 \times 10^{-2}$  mmol, 2.5 M in hexanes, 10.0 mol %) were reacted together in 0.5 mL of benzene-*d*<sub>6</sub>. After 1 h at ambient temperature, 80% conversion to Ph<sub>3</sub>Si(NH<sup>t</sup>Bu) was observed. The reaction was subsequently run to completion.

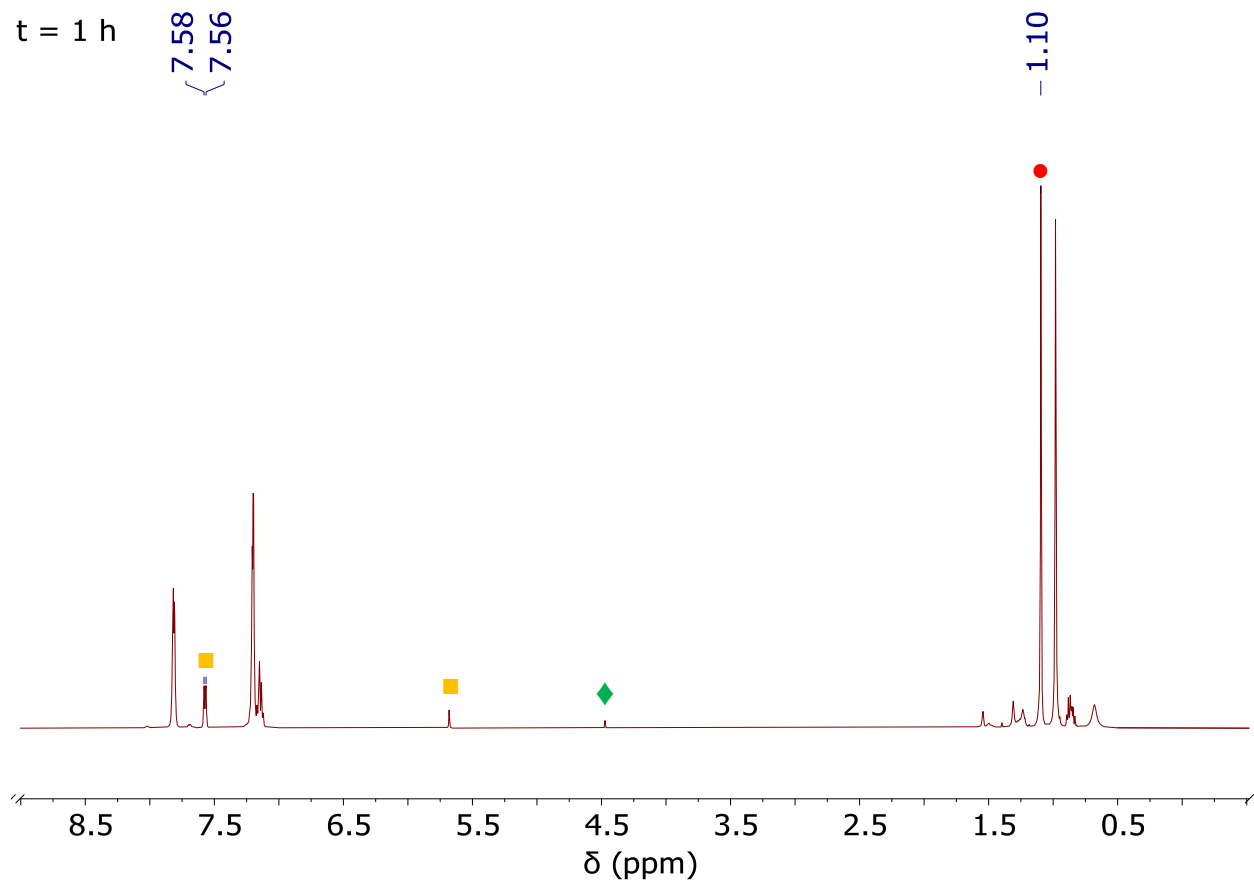

**Figure S3.52.** <sup>1</sup>H NMR spectrum of the reaction between Ph<sub>3</sub>SiH and <sup>t</sup>BuNH<sub>2</sub> catalyzed by **1** in benzene-*d*<sub>6</sub> after 1 h.

### S5.31. Ph<sub>3</sub>SiH and 2.0 equiv. of <sup>n</sup>PeNH<sub>2</sub>

Ph<sub>3</sub>SiH (98.0 mg, 3.7 × 10<sup>-1</sup> mmol), <sup>n</sup>PeNH<sub>2</sub> (87.5 μL, 7.5 × 10<sup>-1</sup> mmol, 2.0 equiv.), and **1** (14.5 μL, 3.7 × 10<sup>-2</sup> mmol, 2.6 M in hexanes, 10.0 mol %) were reacted together in 0.5 mL benzene-*d*<sub>6</sub> in the presence of C<sub>6</sub>Me<sub>6</sub> standard (52.5 μL, 0.4 M in benzene-*d*<sub>6</sub>). Complete consumption of Ph<sub>3</sub>SiH was observed after 1 h. The appearance of a diagnostic quartet centered between δ = 2.86 and δ = 2.84 in the <sup>1</sup>H NMR spectrum, and a single peak in the <sup>29</sup>Si{<sup>1</sup>H} NMR spectrum at δ = -16.51, indicated 100% conversion to Ph<sub>3</sub>Si(NH<sup>n</sup>Pe) after 1 h at ambient temperature. Spectra were consistent with previous reports of this compound.<sup>16</sup>

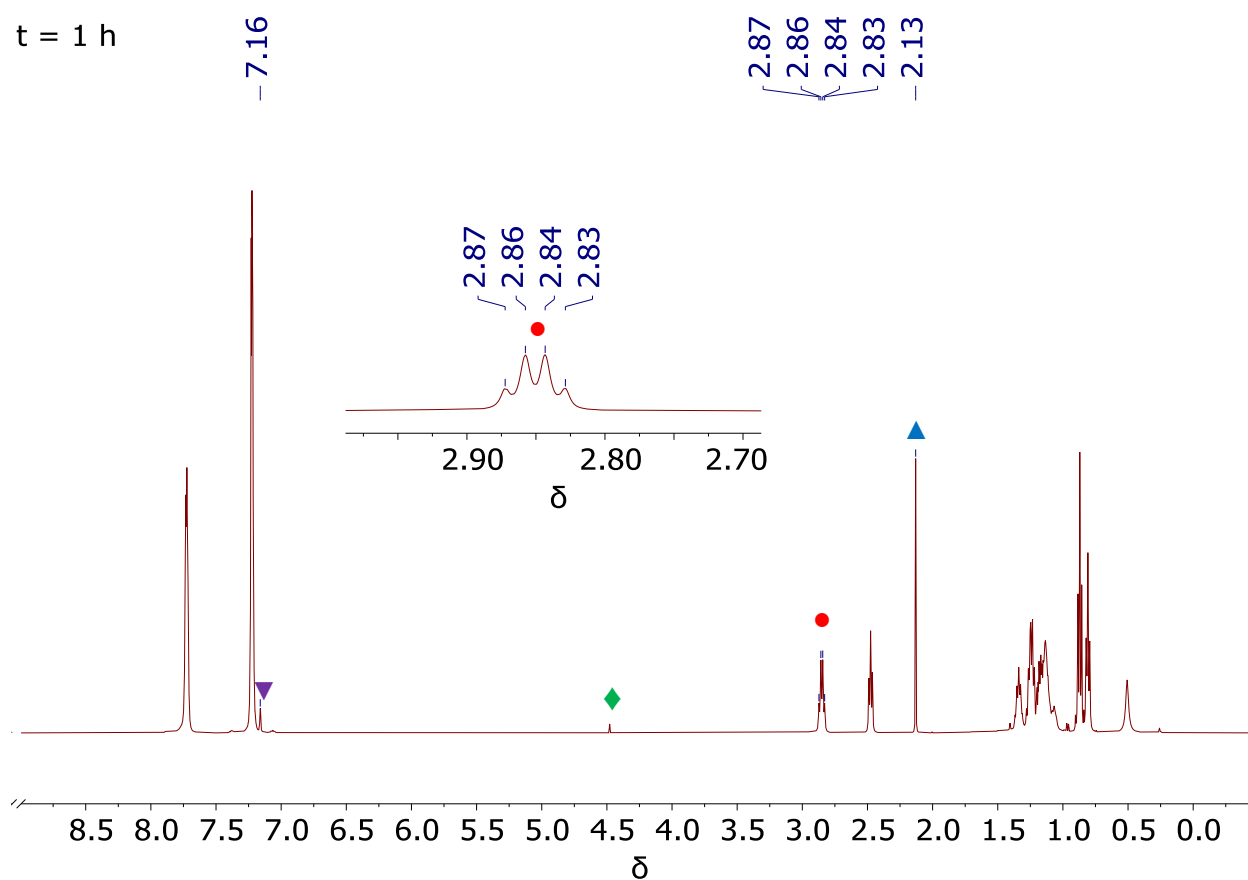

**Figure S3.53.** <sup>1</sup>H NMR spectrum of the reaction between Ph<sub>3</sub>SiH and <sup>n</sup>PeNH<sub>2</sub> catalyzed by **1** in benzene-*d*<sub>6</sub> after 1 h.

t = 1 h

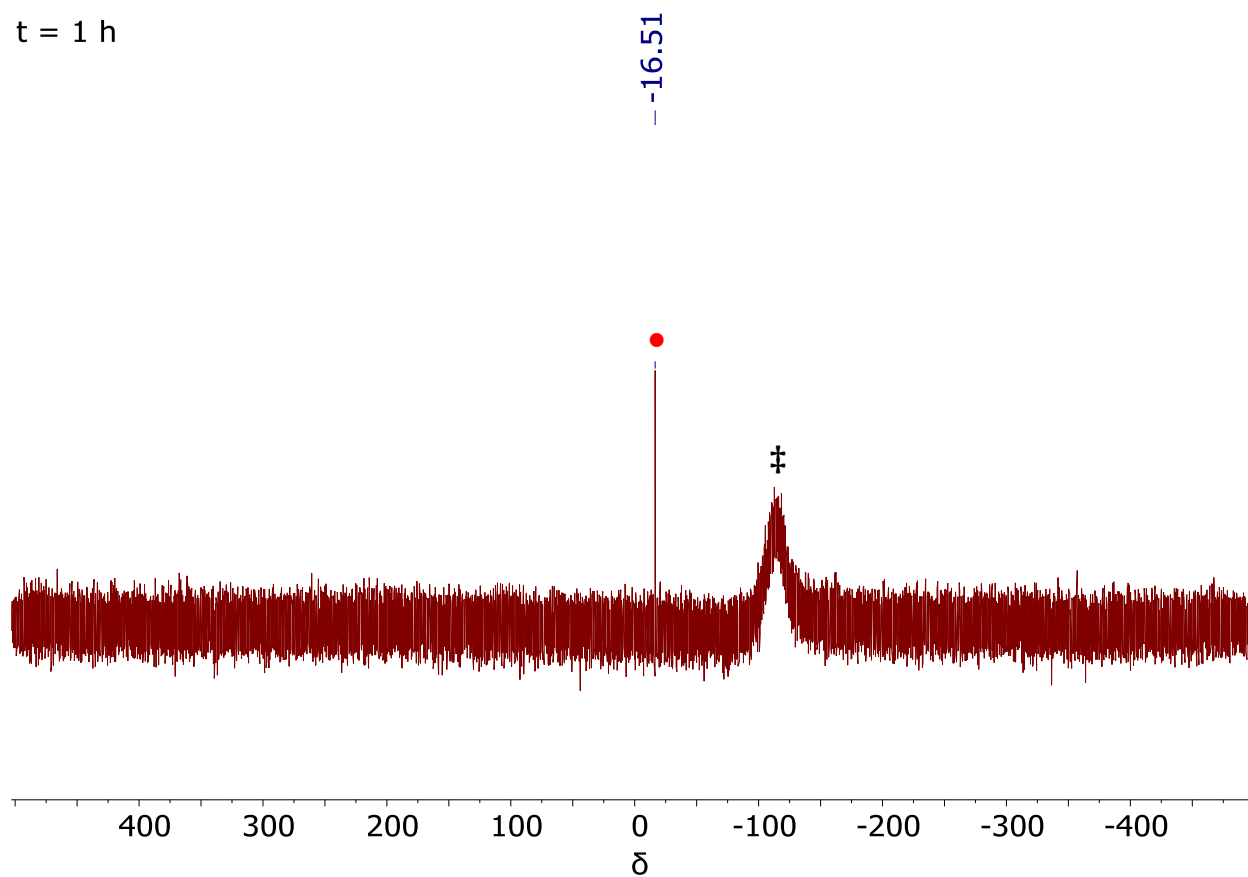

**Figure S3.54.**  $^{29}\text{Si}\{^1\text{H}\}$  NMR spectrum of the reaction between  $\text{Ph}_3\text{SiH}$  and  $^n\text{PeNH}_2$  catalyzed by **1** in benzene- $d_6$  after 1 h.

### S5.32. Ph<sub>3</sub>SiH and 2.0 equiv. of <sup>3</sup>HeNH<sub>2</sub>

Ph<sub>3</sub>SiH (98.0 mg, 3.7 × 10<sup>-1</sup> mmol), <sup>3</sup>HeNH<sub>2</sub> (99.0 μL, 7.5 × 10<sup>-1</sup> mmol, 2.0 equiv.), and **1** (14.5 μL, 3.7 × 10<sup>-2</sup> mmol, 2.6 M in hexanes, 10.0 mol %) were reacted together in 0.5 mL of benzene-*d*<sub>6</sub> in the presence of C<sub>6</sub>Me<sub>6</sub> standard (52.5 μL, 0.4 M in benzene-*d*<sub>6</sub>). Complete consumption of Ph<sub>3</sub>SiH was observed after 1 h. The appearance of a diagnostic quartet centered between δ = 2.87 and δ = 2.85 in the <sup>1</sup>H NMR spectrum, and a single peak in the <sup>29</sup>Si{<sup>1</sup>H} NMR spectrum at δ = -16.50, indicated 100% conversion to Ph<sub>3</sub>Si(NH<sup>3</sup>He) after 1 h at ambient temperature. Spectra were consistent with previous reports of this compound.<sup>16</sup>

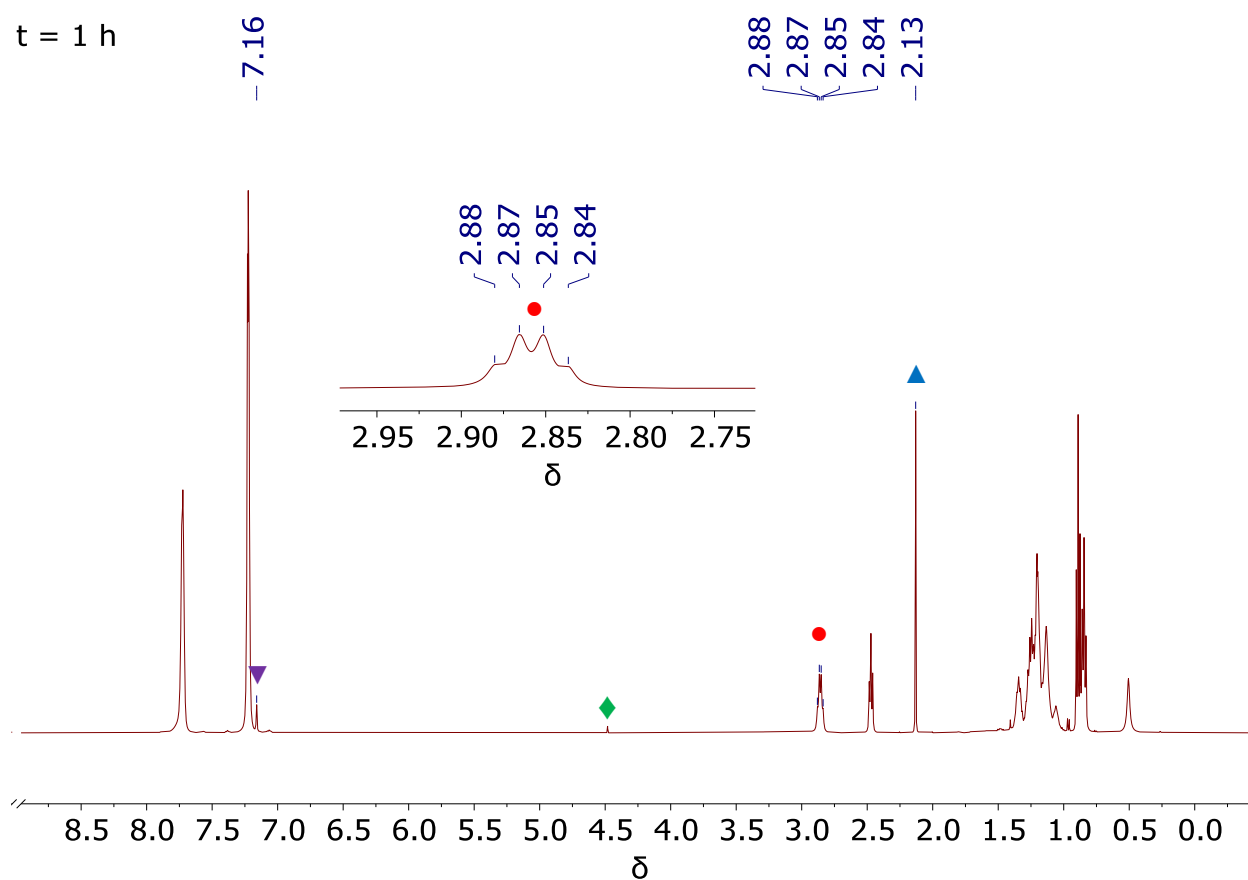

**Figure S3.55.** <sup>1</sup>H NMR spectrum of the reaction between Ph<sub>3</sub>SiH and <sup>3</sup>HeNH<sub>2</sub> catalyzed by **1** in benzene-*d*<sub>6</sub> after 1 h.



t = 1 h

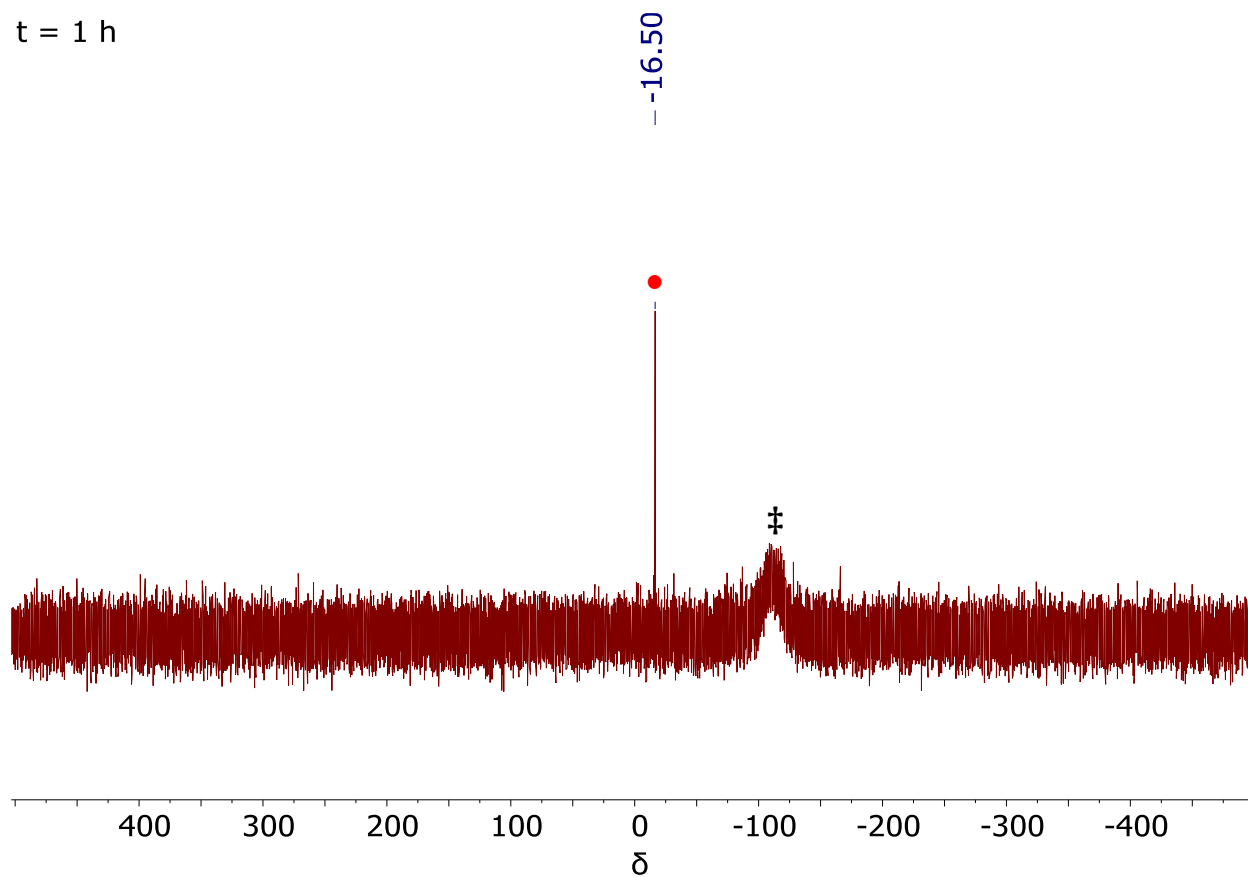

**Figure S3.56.**  $^{29}\text{Si}\{^1\text{H}\}$  NMR spectrum of the reaction between  $\text{Ph}_3\text{SiH}$  and  $^7\text{HeNH}_2$  catalyzed by **1** in benzene- $d_6$  after 1 h.

### S5.33. Ph<sub>3</sub>SiH and 2.0 equiv. of PhNH<sub>2</sub>

Ph<sub>3</sub>SiH (98.0 mg,  $3.7 \times 10^{-1}$  mmol), PhNH<sub>2</sub> (68.0  $\mu$ L,  $7.5 \times 10^{-1}$  mmol, 2.0 equiv.), and **1** (16.5  $\mu$ L,  $3.7 \times 10^{-2}$  mmol, 2.3 M in hexanes, 10.0 mol %) were reacted together in 0.5 mL of benzene-*d*<sub>6</sub>. After 1 h, no reaction occurred.

t = 1 h

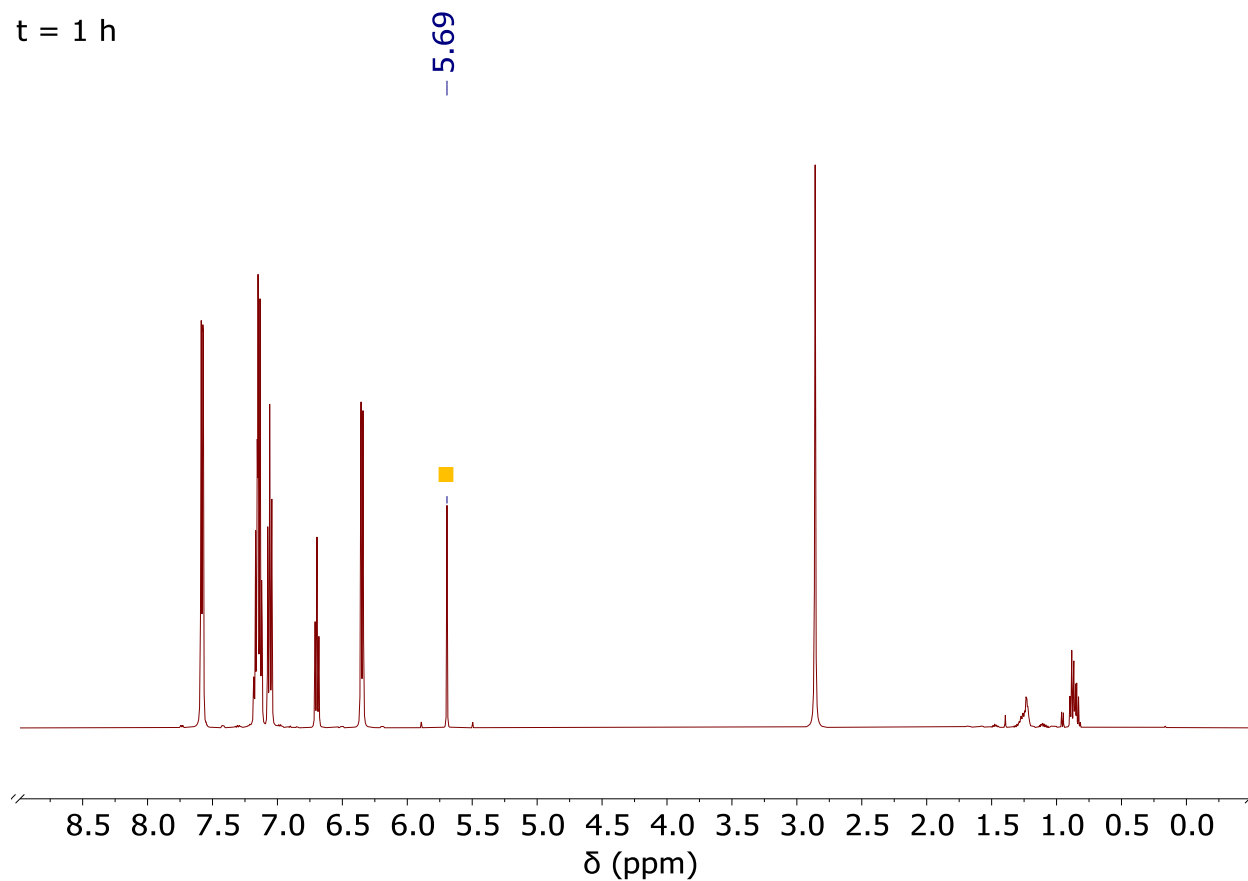

**Figure S3.57.** <sup>1</sup>H NMR spectrum of the reaction between Ph<sub>3</sub>SiH and PhNH<sub>2</sub> catalyzed by **1** in benzene-*d*<sub>6</sub> after 1 h. The peak at -5.69 is Ph<sub>3</sub>SiH.

### S5.34. Ph<sub>3</sub>SiH and 2.0 equiv. of PyNH

Ph<sub>3</sub>SiH (98.0 mg,  $3.7 \times 10^{-1}$  mmol), PyNH (62.0  $\mu$ L,  $7.5 \times 10^{-1}$  mmol, 2.00 equiv.), and **1** (15.0  $\mu$ L,  $3.7 \times 10^{-2}$  mmol, 2.5 M in hexanes, 10.0 mol %) were reacted together in 0.5 mL of benzene-*d*<sub>6</sub>. Complete consumption of Ph<sub>3</sub>SiH was observed after 0.5 h. The appearance of a diagnostic multiplet centered at  $\delta = 3.10$  in the <sup>1</sup>H NMR spectrum indicated 100% conversion to Ph<sub>3</sub>Si(NPy) after 0.5 h at ambient temperature. Spectra were consistent with previous reports of this compound.<sup>17</sup>

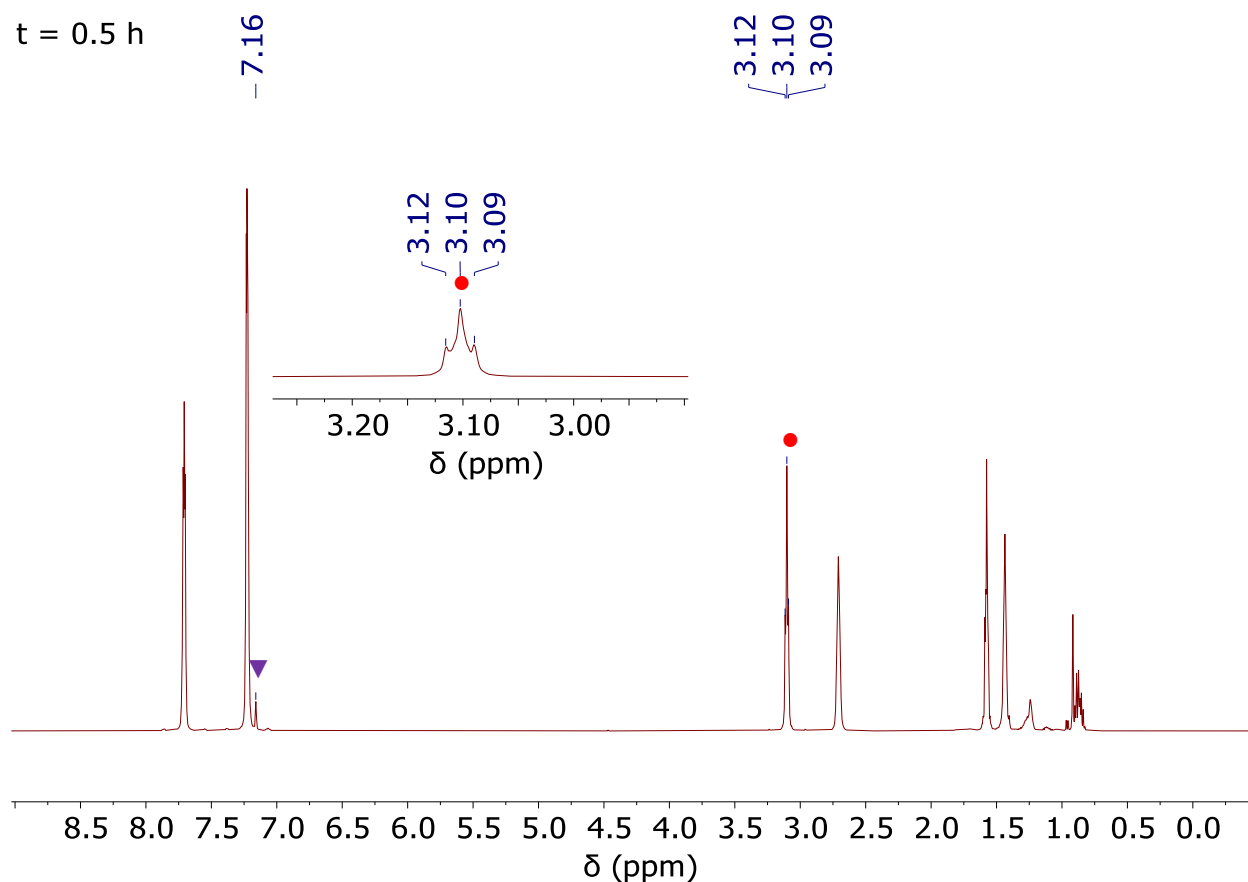

**Figure S3.58.** <sup>1</sup>H NMR spectrum of the reaction between Ph<sub>3</sub>SiH and PyNH catalyzed by **1** in benzene-*d*<sub>6</sub> after 0.5 h.

t = 0.5 h

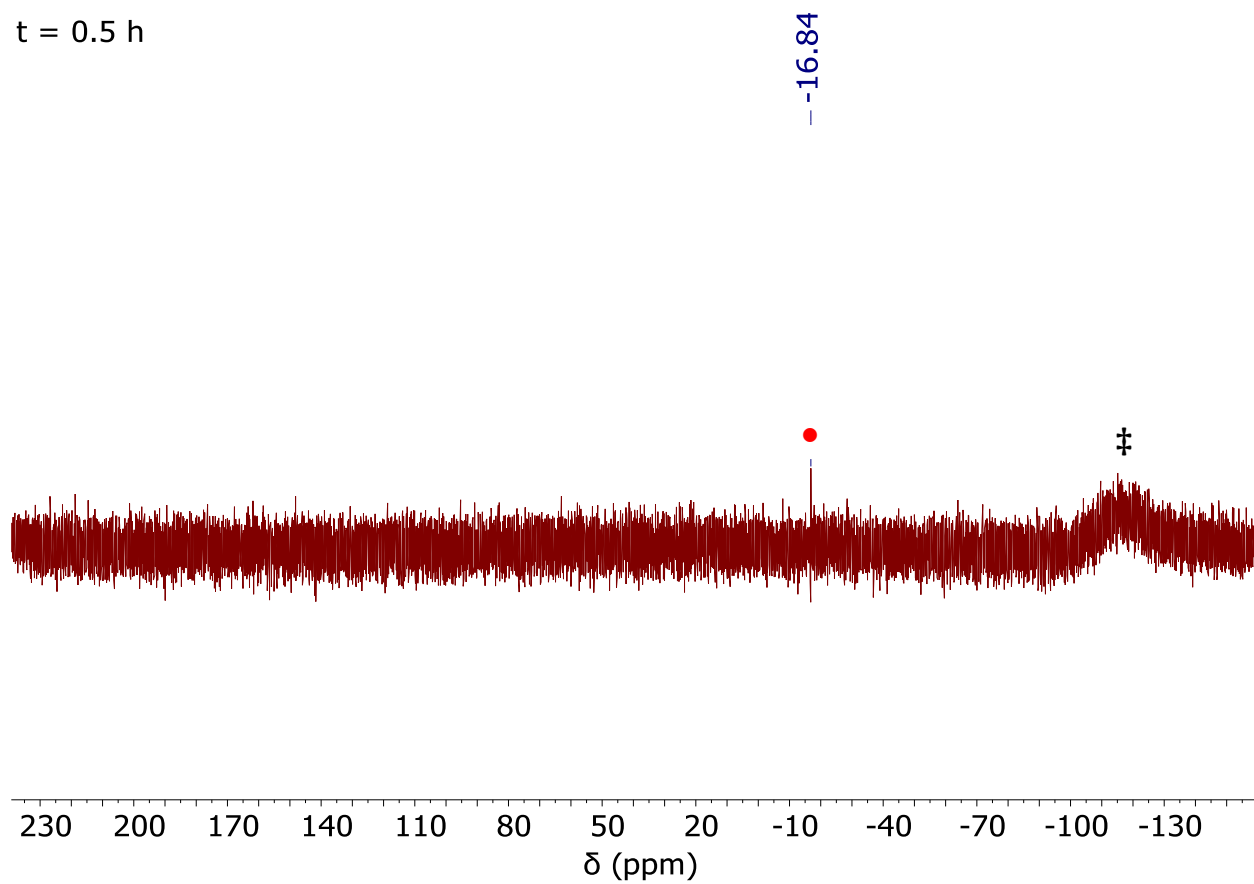

**Figure S3.59.**  $^{29}\text{Si}\{^1\text{H}\}$  NMR spectrum of the reaction between  $\text{Ph}_3\text{SiH}$  and  $\text{PyNH}$  catalyzed by **1** in benzene- $d_6$  after 1 h.

### S5.35. Ph<sub>3</sub>SiH and 2.0 equiv. of Et<sub>2</sub>NH

Ph<sub>3</sub>SiH (98.0 mg,  $3.7 \times 10^{-1}$  mmol), Et<sub>2</sub>NH (78.0  $\mu$ L,  $7.5 \times 10^{-1}$  mmol, 2.0 equiv.), and **1** (15.0  $\mu$ L,  $3.7 \times 10^{-2}$  mmol, 2.5 M in hexanes, 10.0 mol %) were reacted together in 0.5 mL of benzene-*d*<sub>6</sub>. After 1 h at ambient temperature, 88% conversion to Ph<sub>3</sub>Si(NEt<sub>2</sub>). The reaction was run to completion.

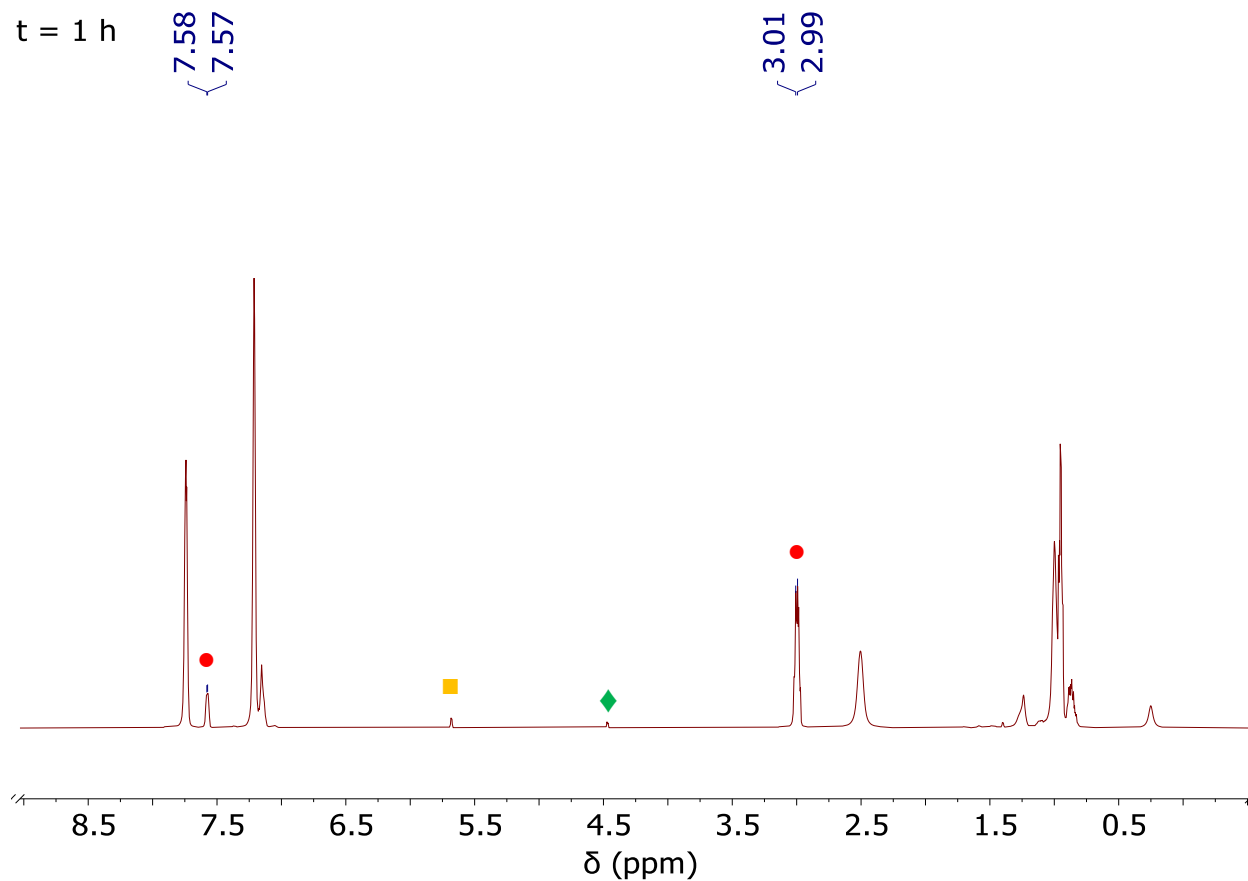

**Figure S3.60.** <sup>1</sup>H NMR spectrum of the reaction between Ph<sub>3</sub>SiH and Et<sub>2</sub>NH catalyzed by **1** in benzene-*d*<sub>6</sub> after 1 h.

### S5.36. (*p*-MeO-C<sub>6</sub>H<sub>4</sub>)Ph<sub>2</sub>SiH and 2.0 equiv. of <sup>t</sup>BuNH<sub>2</sub>

(*p*-MeO-C<sub>6</sub>H<sub>4</sub>)Ph<sub>2</sub>SiH (116.6 mg, 4.0 × 10<sup>-1</sup> mmol), <sup>t</sup>BuNH<sub>2</sub> (84.5 μL, 8.0 × 10<sup>-1</sup> mmol, 2.0 equiv.), and **1** (16.0 μL, 4.0 × 10<sup>-2</sup> mmol, 2.5 M in hexanes, 10.0 mol %) were reacted together in 0.5 mL of benzene-*d*<sub>6</sub>. After 1 h at ambient temperature, (*p*-MeO-C<sub>6</sub>H<sub>4</sub>)Ph<sub>2</sub>Si(NH<sup>t</sup>Bu) was formed in approximately 72% conversion. The reaction was subsequently run to completion.

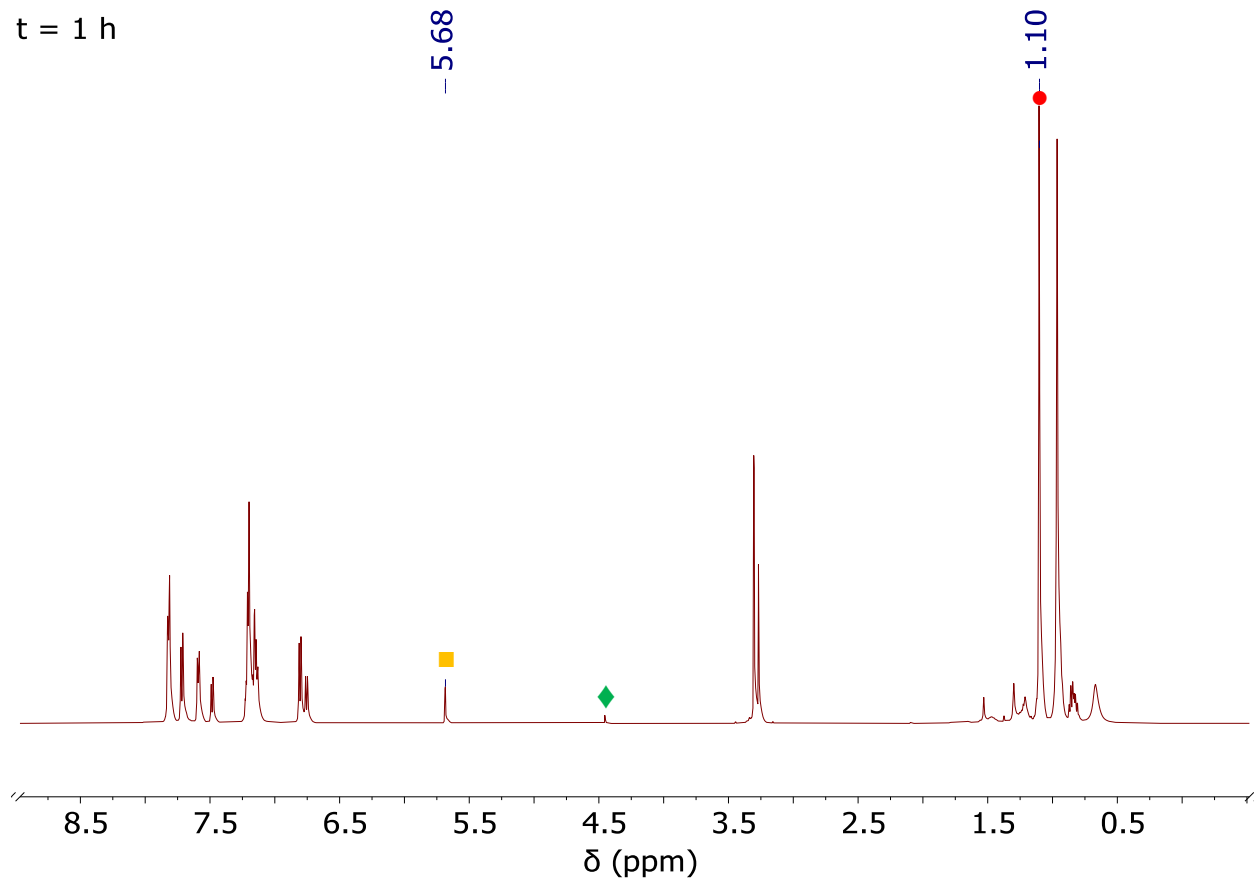

**Figure S3.61.** <sup>1</sup>H NMR spectrum of the reaction between (*p*-MeO-C<sub>6</sub>H<sub>4</sub>)Ph<sub>2</sub>SiH and <sup>t</sup>BuNH<sub>2</sub> catalyzed by **1** in benzene-*d*<sub>6</sub> after 1 h. Residual solvent is buried by aryl peaks.

**S5.37. (*p*-Me-C<sub>6</sub>H<sub>4</sub>)Ph<sub>2</sub>SiH and 2.0 equiv. of <sup>t</sup>BuNH<sub>2</sub>**

(*p*-Me-C<sub>6</sub>H<sub>4</sub>)Ph<sub>2</sub>SiH (95.0 mg, 3.5 × 10<sup>-1</sup> mmol), <sup>t</sup>BuNH<sub>2</sub> (72.5 μL, 7.0 × 10<sup>-1</sup> mmol, 2.0 equiv.), and **1** (14.0 μL, 3.5 × 10<sup>-2</sup> mmol, 2.5 M in hexanes, 10.0 mol %) were reacted together in 0.5 mL of benzene-*d*<sub>6</sub>. After 1 h at ambient temperature, (*p*-Me-C<sub>6</sub>H<sub>4</sub>)Ph<sub>2</sub>Si(NH<sup>t</sup>Bu) was formed in approximately 77% conversion. The reaction was subsequently run to completion.

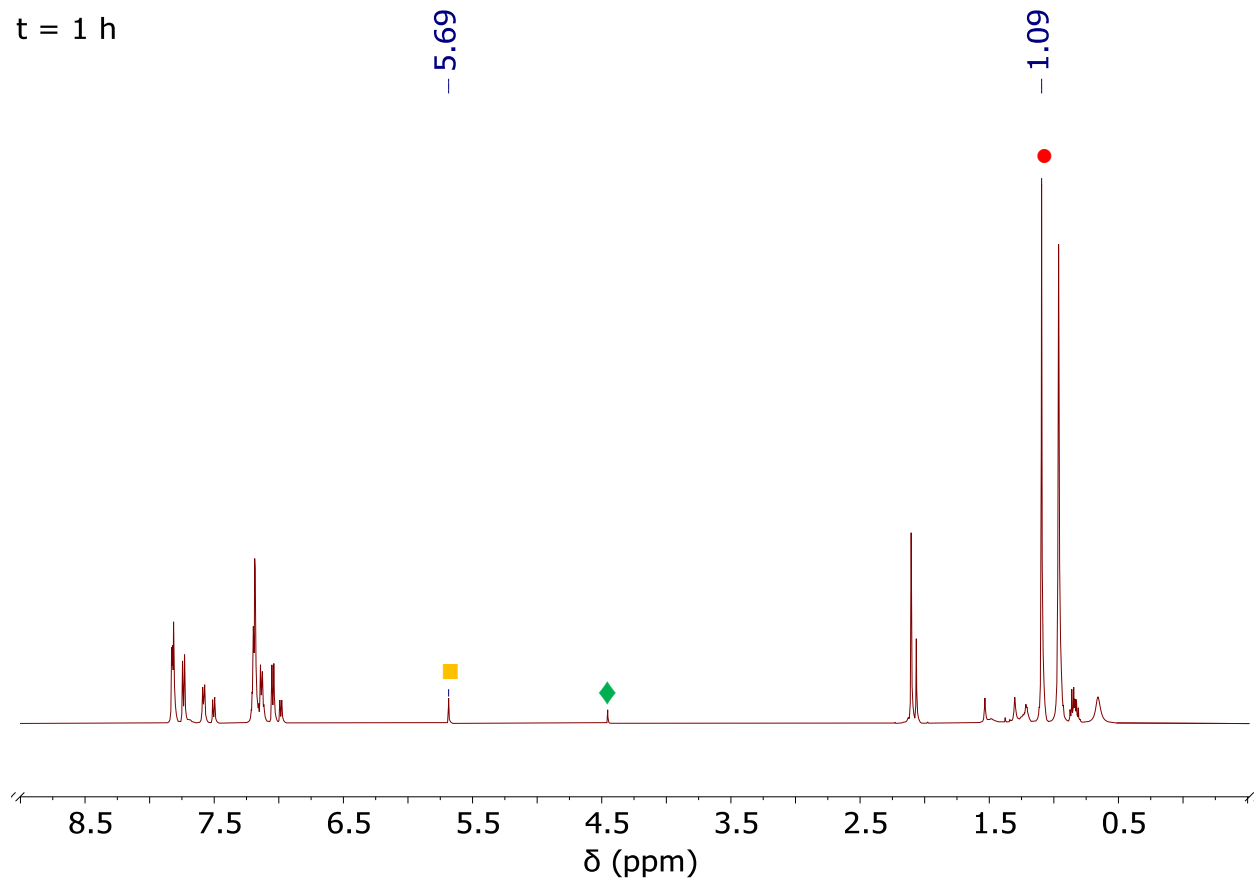

**Figure S3.62.** <sup>1</sup>H NMR spectrum of the reaction between (*p*-Me-C<sub>6</sub>H<sub>4</sub>)Ph<sub>2</sub>SiH and <sup>t</sup>BuNH<sub>2</sub> catalyzed by **1** in benzene-*d*<sub>6</sub> after 1 h. Residual solvent is buried by aryl peaks.

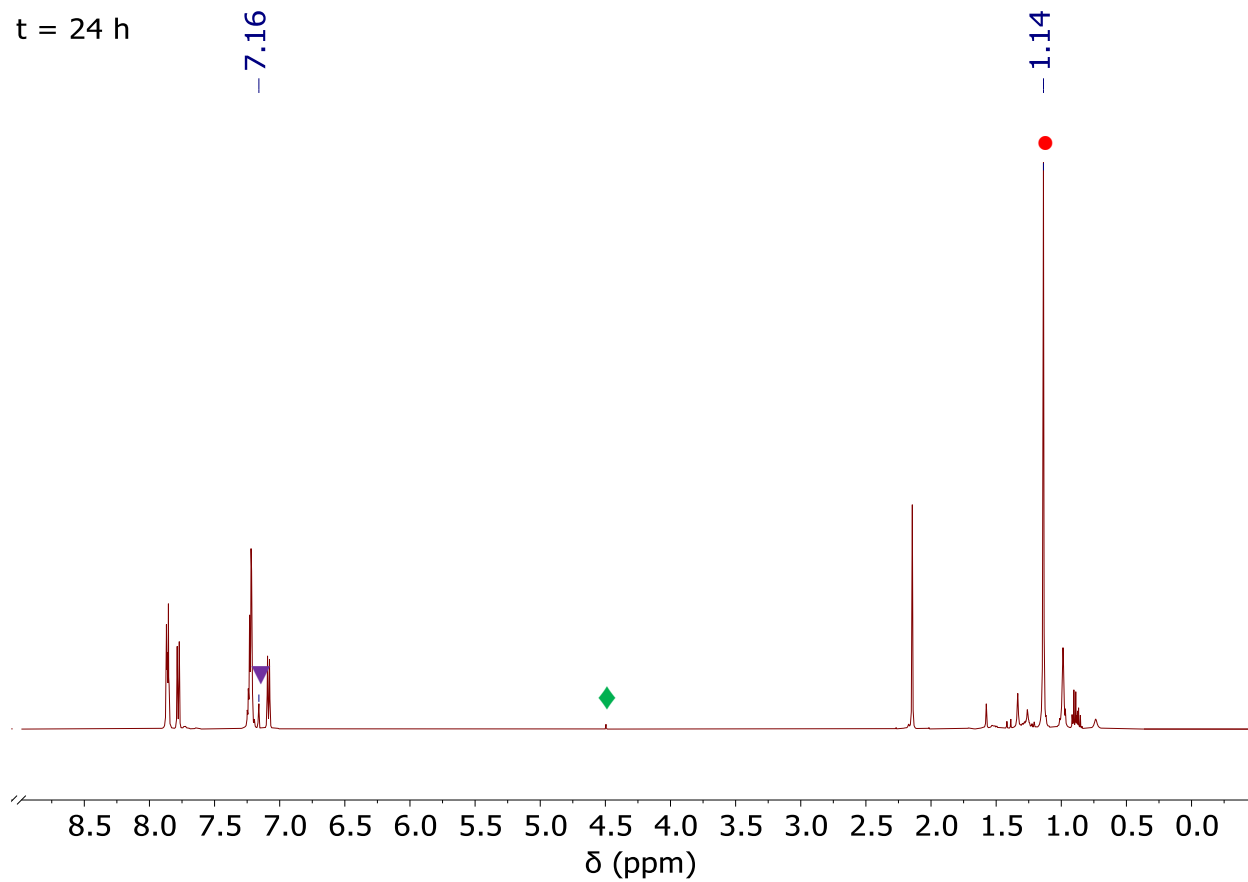

**Figure S3.63.**  $^1\text{H}$  NMR spectrum of the reaction between  $(p\text{-Me-C}_6\text{H}_4)_2\text{SiH}$  and  $t\text{BuNH}_2$  catalyzed by **1** in benzene- $d_6$  after 24 h.



**S5.38. (*p*-F<sub>3</sub>C-C<sub>6</sub>H<sub>4</sub>)Ph<sub>2</sub>SiH and 2.0 equiv. of <sup>t</sup>BuNH<sub>2</sub>**

(*p*-F<sub>3</sub>C-C<sub>6</sub>H<sub>4</sub>)Ph<sub>2</sub>SiH (146.1 mg, 4.4 × 10<sup>-1</sup> mmol), <sup>t</sup>BuNH<sub>2</sub> (93.5 μL, 8.8 × 10<sup>-1</sup> mmol, 2.0 equiv.), and **1** (18.0 μL, 4.5 × 10<sup>-2</sup> mmol, 2.5 M in hexanes, 10.0 mol %) were reacted together in 0.5 mL of benzene-*d*<sub>6</sub>. After 1 h at ambient temperature, (*p*-F<sub>3</sub>C-C<sub>6</sub>H<sub>4</sub>)Ph<sub>2</sub>Si(NH<sup>t</sup>Bu) was formed in approximately 54% conversion. The reaction was subsequently run to completion.

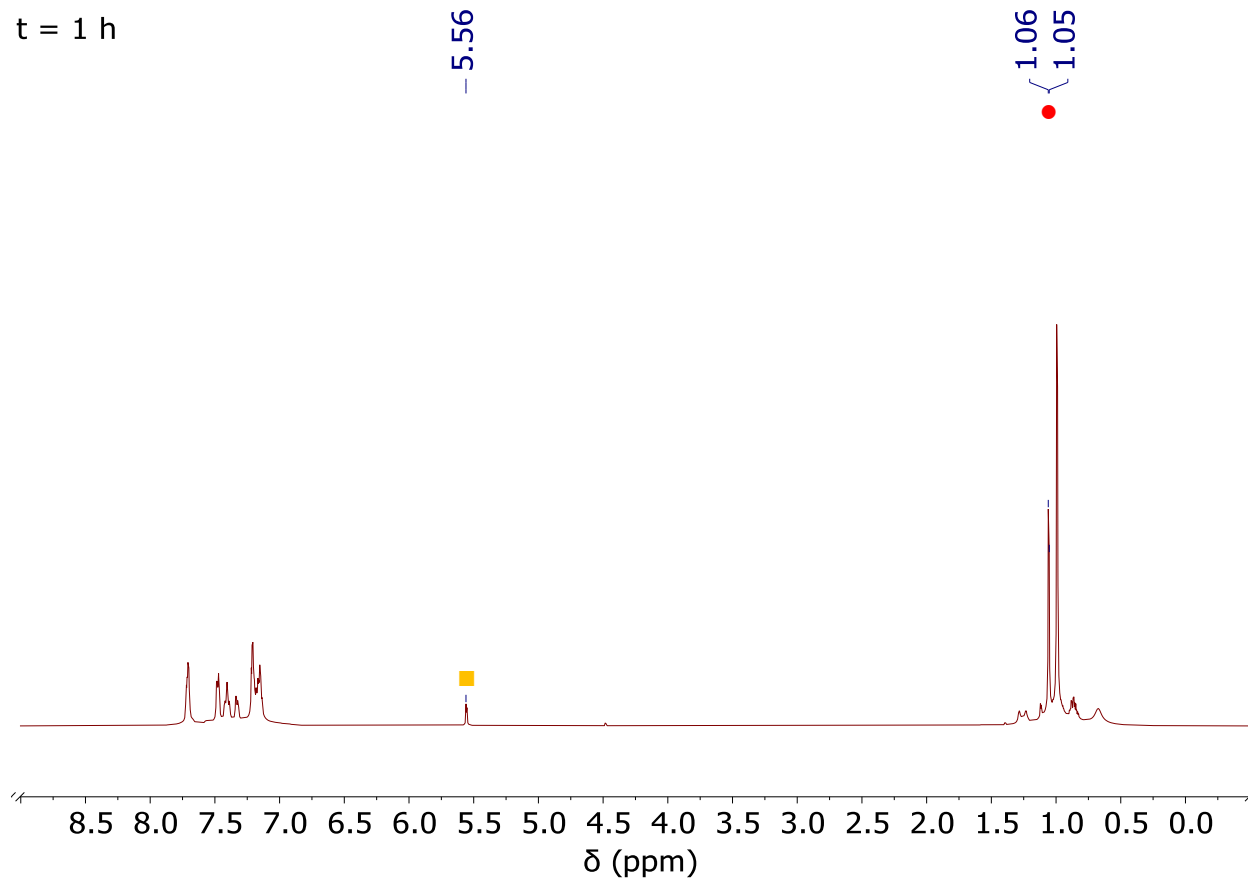

**Figure S3.64.** <sup>1</sup>H NMR spectrum of the reaction between (*p*-F<sub>3</sub>C-C<sub>6</sub>H<sub>4</sub>)Ph<sub>2</sub>SiH and <sup>t</sup>BuNH<sub>2</sub> catalyzed by **1** in benzene-*d*<sub>6</sub> after 1 h. Residual solvent is buried by aryl peaks.

### S5.39. Et<sub>3</sub>SiH and 2.0 equiv. of PyNH

Et<sub>3</sub>SiH (60.5  $\mu$ L, 44.0 mg,  $3.7 \times 10^{-1}$  mmol), PyNH (62.5  $\mu$ L,  $7.6 \times 10^{-1}$  mmol, 2.0 equiv.), and **1** (16.5  $\mu$ L,  $3.7 \times 10^{-2}$  mmol, 2.3 M in hexanes, 10.0 mol %) were reacted together in 0.5 mL of benzene-*d*<sub>6</sub>.

After 1 h at ambient temperature, Et<sub>3</sub>Si(NPy) was formed in approximately 93% conversion.

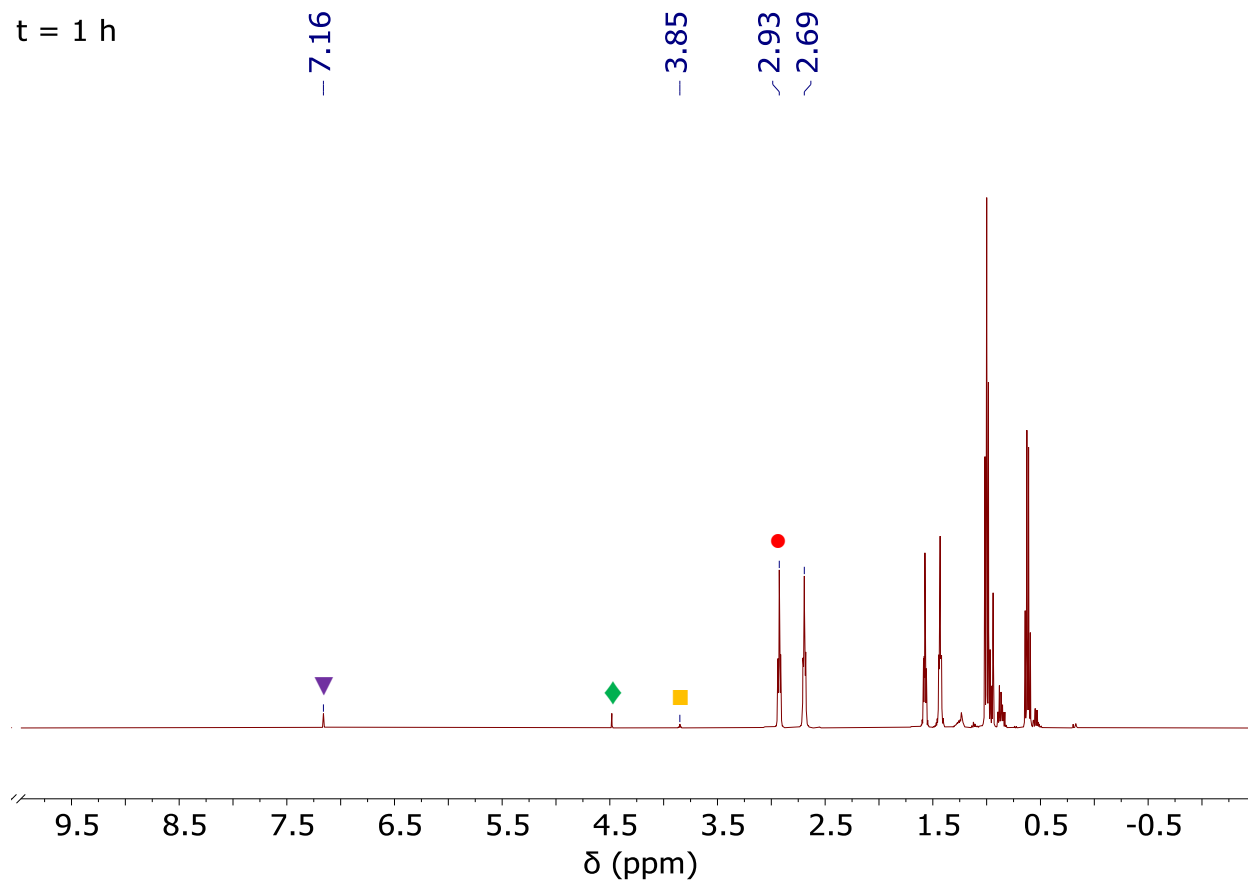

**Figure S3.65.** <sup>1</sup>H NMR spectrum of the reaction between Et<sub>3</sub>SiH and PyNH catalyzed by **1** in benzene-*d*<sub>6</sub> after 1 h.

### S5.40. Et<sub>3</sub>SiH and 2.0 equiv. of Ph<sub>2</sub>NH

Et<sub>3</sub>SiH (79.0 μL, 4.9 × 10<sup>-1</sup> mmol), Ph<sub>2</sub>NH (168.0 mg, 9.9 × 10<sup>-1</sup> mmol, 2.0 equiv.), and **1** (15.0 μL, 4.9 × 10<sup>-2</sup> mmol, 2.3 M in hexanes, 10.0 mol %) were reacted together in 0.5 mL of benzene-*d*<sub>6</sub>. After 1 h at ambient temperature, no reaction occurred.

t = 1 h

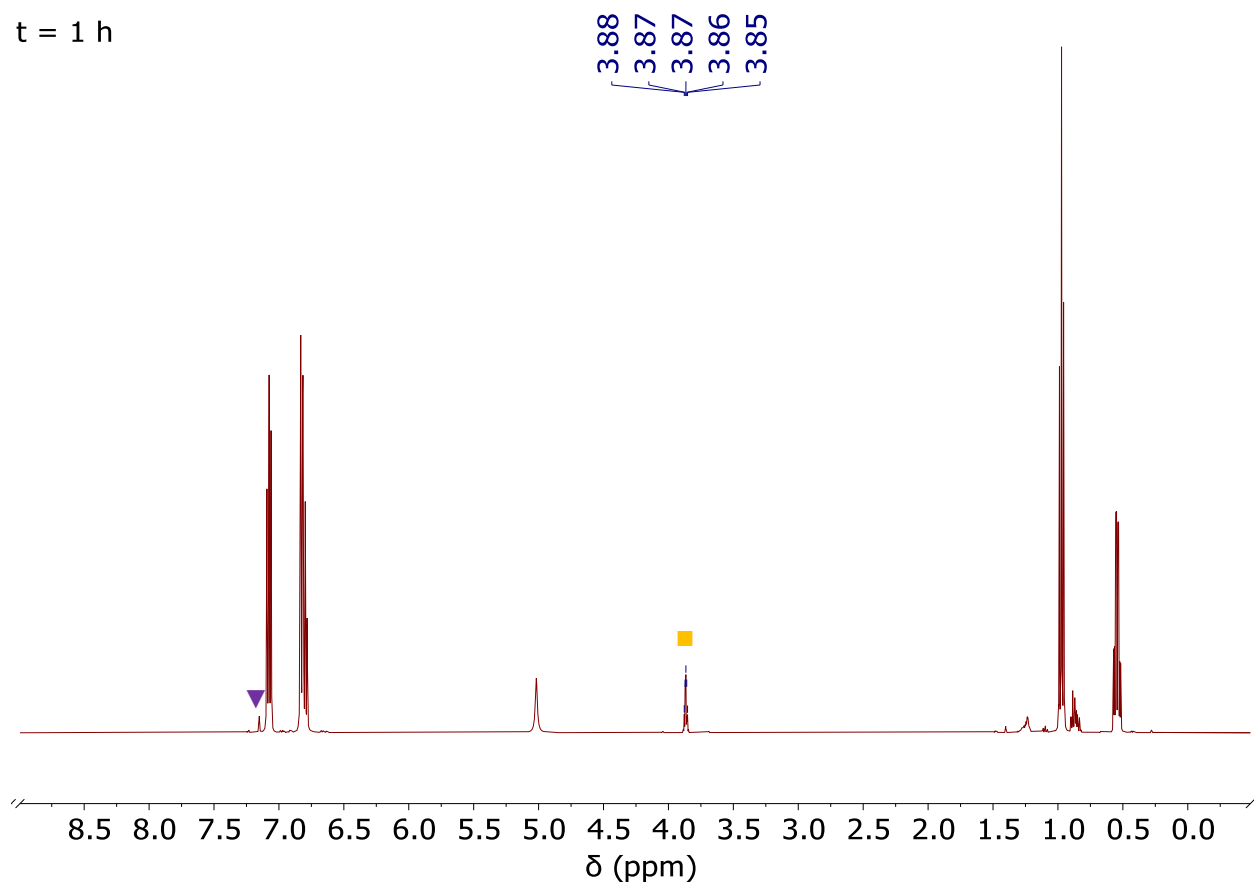

**Figure S3.66.** <sup>1</sup>H NMR spectrum of the reaction between Et<sub>3</sub>SiH and Ph<sub>2</sub>NH catalyzed by **1** in benzene-*d*<sub>6</sub> after 1 h. The peak centered at δ = 3.87 is Et<sub>3</sub>SiH.

## S4. EPR Acquisition

### S4.1. General Procedure

$\text{Ph}_3\text{SiH}$  (96.0 mg,  $3.7 \times 10^{-1}$  mmol),  ${}^t\text{BuNH}_2$  (77.0  $\mu\text{L}$ ,  $7.4 \times 10^{-1}$  mmol, 2.0 equiv.), and **1** (14.0  $\mu\text{L}$ ,  $3.7 \times 10^{-2}$  mmol) were reacted together in a PTFE-sealed J-Young Quartz NMR tube. After 5 min, EPR measurements were acquired at ambient temperature.

### S4.2. EPR Spectrum

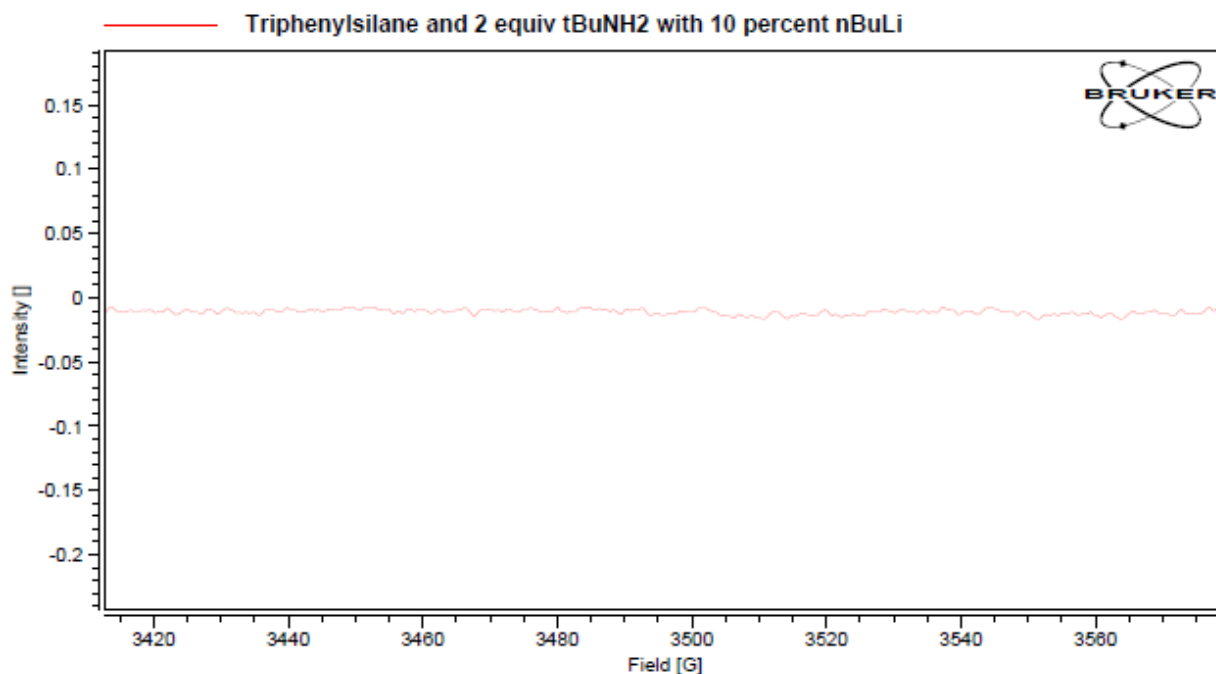

**Figure S4.1.** EPR Spectrum of the reaction between  $\text{Ph}_3\text{SiH}$  and 2.0 equiv. of  ${}^t\text{BuNH}_2$  with **1**

Conditions: microwave frequency =  $98.5 \times 10^{-1}$  GHz; microwave power =  $632.5 \times 10^{-3}$  mW; modulation amplitude = 1.0 G; modulation frequency = 100.0 kHz; time constant =  $1.0 \times 10^{-2}$  ms; conversion time = 90.0 ms

## S5. Workup and Characterization Details

### S5.1. General Workup for Isolating Aminosilanes

After completion of the reaction, the desired aminosilane was purified either by vacuum distillation or vacuum distillation.

For aminosilanes  $\text{PhSi}(\text{NPy})_3$ , (*p*-MeO-C<sub>6</sub>H<sub>4</sub>)Ph<sub>2</sub>Si(NH*t*Bu), (*p*-Me-C<sub>6</sub>H<sub>4</sub>)Ph<sub>2</sub>Si(NH*t*Bu), and (*p*-F<sub>3</sub>C-C<sub>6</sub>H<sub>4</sub>)Ph<sub>2</sub>Si(NH*t*Bu), the NMR tube was opened to air, the solution added to a 20 mL scintillation vial to quench reactive intermediates, and the contents subsequently transferred to a W-shaped, bulb-to-bulb distillation apparatus via glass pipette. The contents were carefully reduced under dynamic vacuum to afford an oil, which was subsequently distilled over, using consistent and even heating from a heat gun. The W distillation apparatus was brought into the glovebox and the oil was characterized.

For aminosilanes  $\text{Ph}_3\text{Si}(\text{NH}^i\text{Bu})$  and  $\text{Ph}_3\text{Si}(\text{NEt}_2)$ , the NMR tube was opened to air, and the contents quickly transferred to a Schlenk tube under dynamic N<sub>2</sub>. The tube was sealed with a glass stopper and the contents were reduced to either an oil or a solid under dynamic vacuum. The stopper was subsequently switched for a water-cooled cold finger and the contents heated under dynamic vacuum until solid had sublimed. The sublimator was brought into the glovebox and the pure solid was characterized.

## S5.2. PhSi(NPy)<sub>3</sub>

Colorless oil (Yield: 52 mg, 44%). <sup>1</sup>H NMR (benzene-*d*<sub>6</sub>, 500 MHz): 7.77 (d, *J* = 7.9 Hz, 2H), 7.41-7.19 (m, 3H), 3.13 (s, 12H), 1.63 (s, 12 H). <sup>13</sup>C{<sup>1</sup>H} NMR (benzene-*d*<sub>6</sub>, 126 MHz): 137.88 (s), 135.37 (s), 129.17 (s), 47.49 (s), 27.22 (s). <sup>29</sup>Si{<sup>1</sup>H} (benzene-*d*<sub>6</sub>, 99Hz): -34.67. HRMS (ESI) [M+H]<sup>+</sup> for C<sub>18</sub>H<sub>30</sub>N<sub>3</sub>Si<sup>+</sup>; calc'd: 316.2204, found: 316.2197.

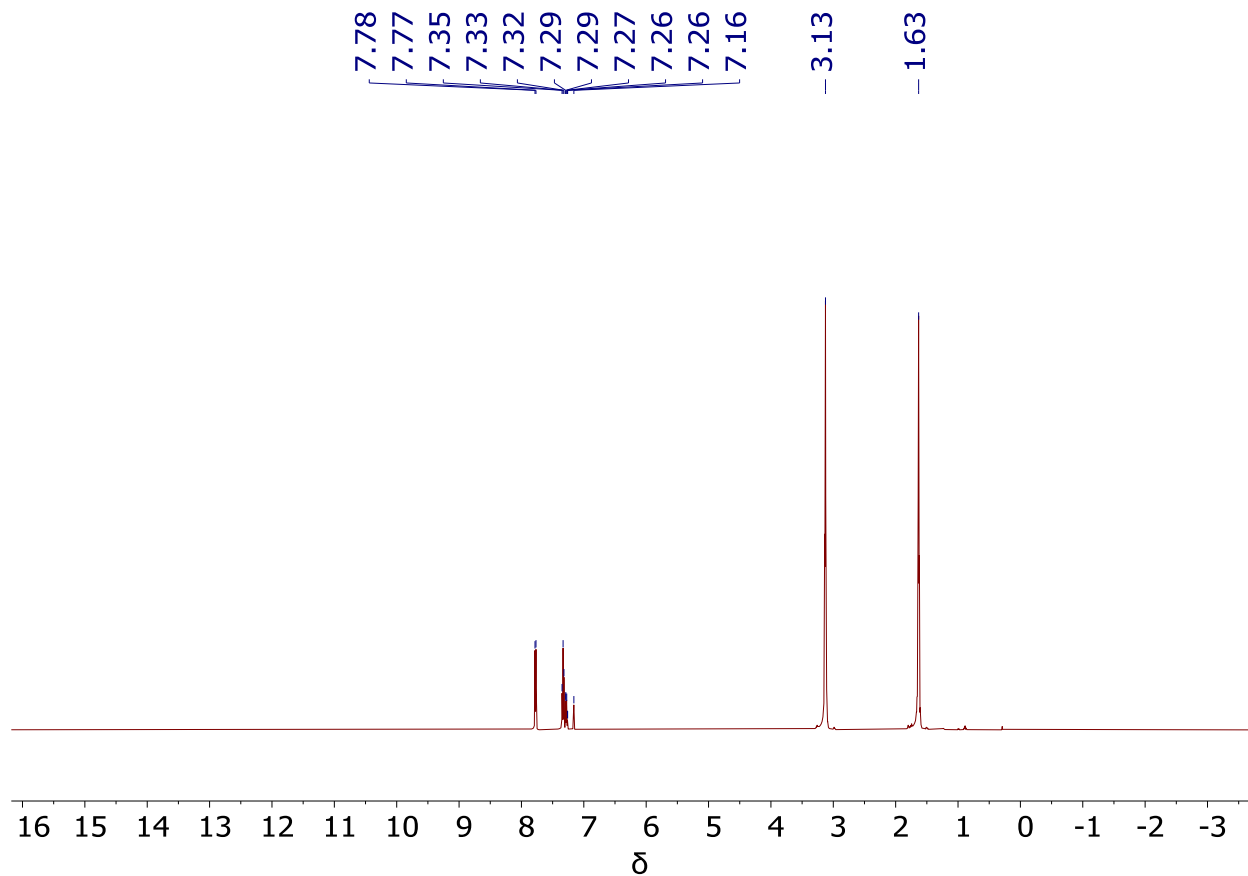

**Figure S5.1.** <sup>1</sup>H NMR spectrum for PhSi(NPy)<sub>3</sub>.

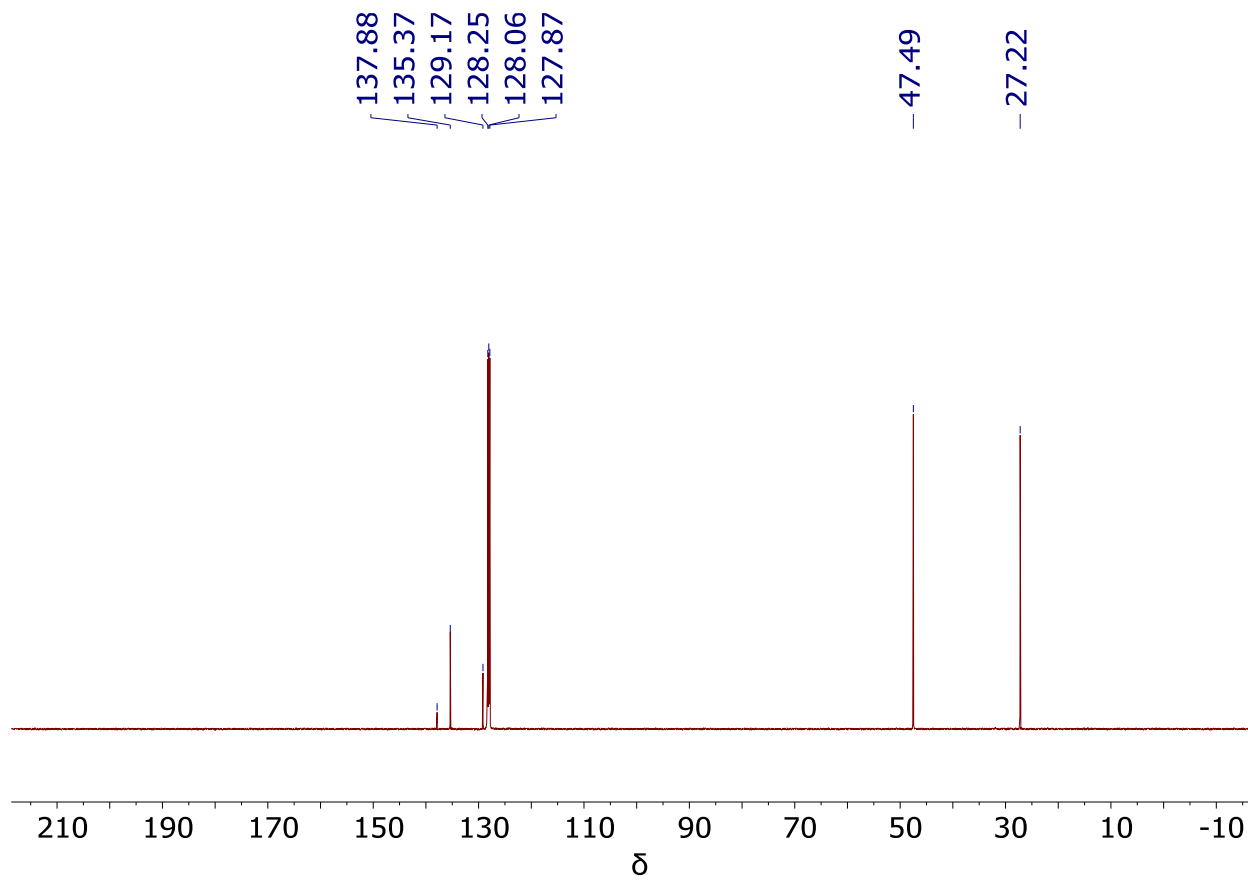

**Figure S5.2.**  $^{13}\text{C}\{^1\text{H}\}$  NMR spectrum for  $\text{PhSi}(\text{NPy})_3$ .

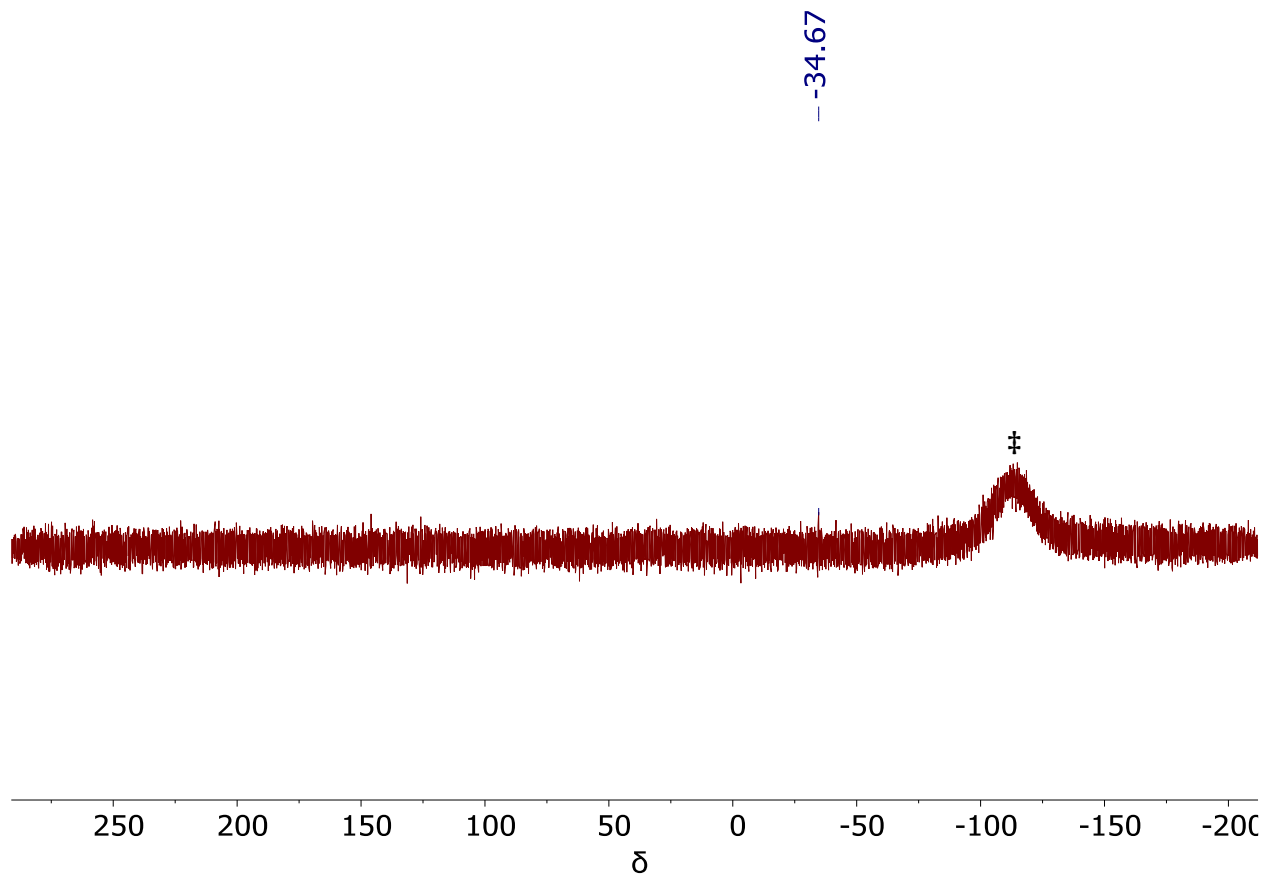

**Figure S5.3.**  $^{29}\text{Si}\{^1\text{H}\}$  NMR spectrum for  $\text{PhSi}(\text{NPy})_3$ .



# Spectrum Plot Report

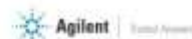

|                |                           |              |                        |                 |                   |                                  |
|----------------|---------------------------|--------------|------------------------|-----------------|-------------------|----------------------------------|
| Name           | Chem Dept HRMS            | Rack Pos.    | Instrument             | DESKTOP-NE620FS | Operator          | SYSTEM (SYSTEM)                  |
| Inj. Vol. (ul) | 0                         | Plate Pos.   | IRM Status             | Success         |                   |                                  |
| Data File      | MBR-07-044 pos ESI HRMS.d | Method (Acq) | Direct Infusion 3min.m | Comment         | Acq. Time (Local) | 2/21/2023 3:04:48 PM (UTC-05:00) |

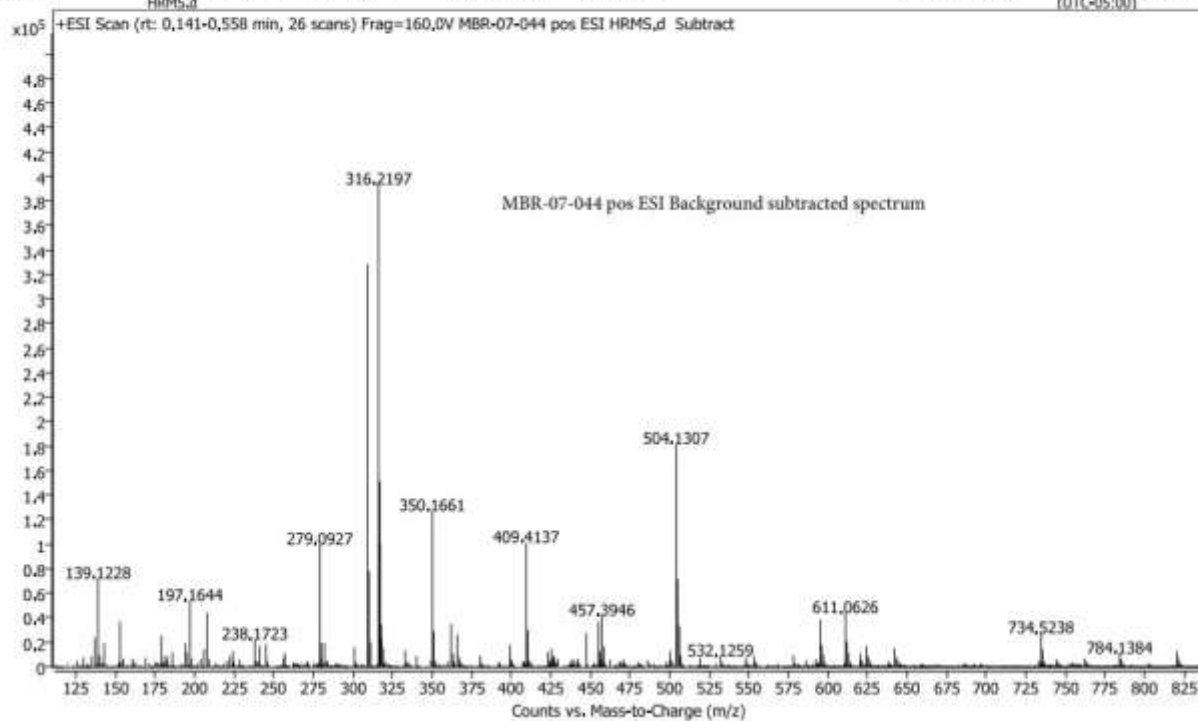

**Figure S5.4.** Full HRMS fragmentation spectrum for  $[\text{PhSi}(\text{NPy})_3 + \text{H}]^+$ .

# Spectrum Plot Report

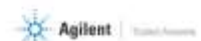

|                |                           |              |                        |                 |                   |                      |
|----------------|---------------------------|--------------|------------------------|-----------------|-------------------|----------------------|
| Name           | Chem Dept HRMS            | Rack Pos.    | Instrument             | DESKTOP-NE620FS | Operator          | SYSTEM (SYSTEM)      |
| Inj. Vol. (ul) | 0                         | Plane Pos.   | IRM Status             | Success         | Acq. Time (Local) | 2/21/2023 3:04:48 PM |
| Data File      | MBR-07-044 pos ESI HRMS.d | Method (Acq) | Direct Infusion 3min.m | Comment         |                   | (UTC-05:00)          |

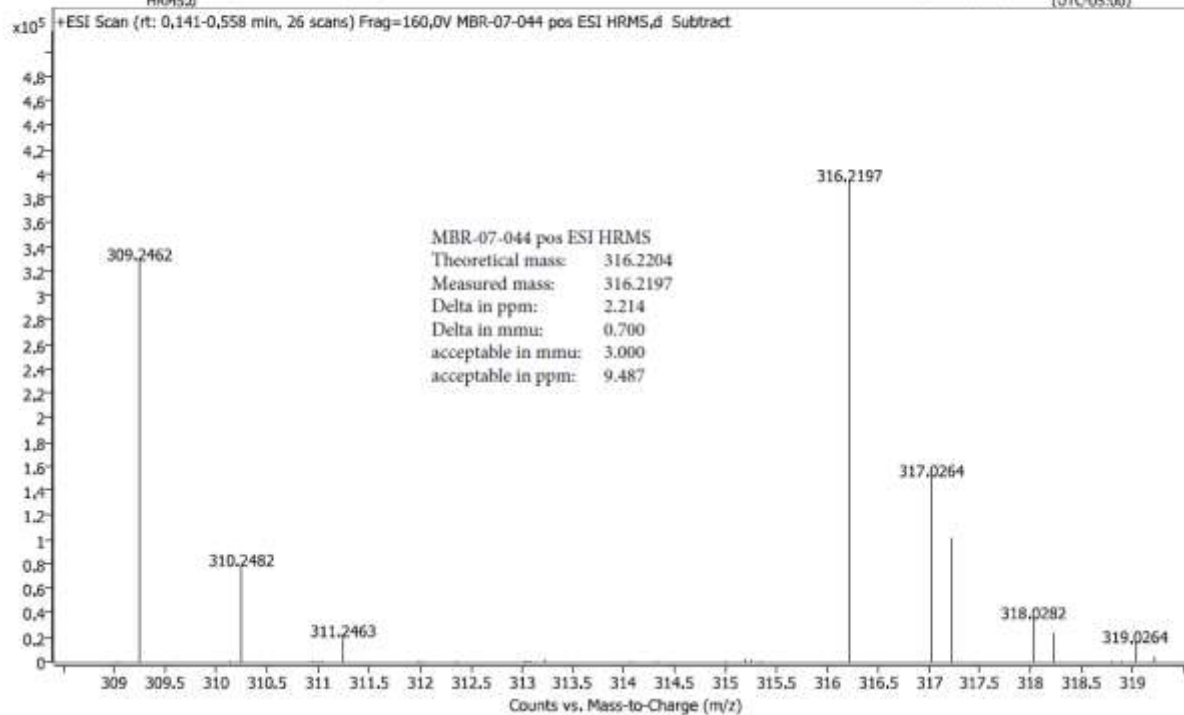

Figure S5.5. Background-subtracted HRMS fragmentation spectrum for  $[\text{PhSi}(\text{NPy})_3+\text{H}]^+$ .

### S5.3. Ph<sub>3</sub>Si(NH<sup>t</sup>Bu)

White solid (14.9 mg, 12% yield). <sup>1</sup>H NMR (benzene-*d*<sub>6</sub>, 500 MHz): 7.88-7.79 (m, 6H), 7.21 (dd, *J* = 5.0, 1.9 Hz), 1.28 (s, 1H), 1.09 (s, 9H). <sup>13</sup>C{<sup>1</sup>H} NMR (benzene-*d*<sub>6</sub>, 126 MHz): 137.38, 135.89, 129.30, 33.54, 1.09. <sup>29</sup>Si{<sup>1</sup>H} NMR (benzene-*d*<sub>6</sub>, 99 MHz): -20.93. HRMS (ESI) [M+H]<sup>+</sup> for C<sub>22</sub>H<sub>26</sub>NSi<sup>+</sup>; calc'd: 332.1819, found: 332.1819.

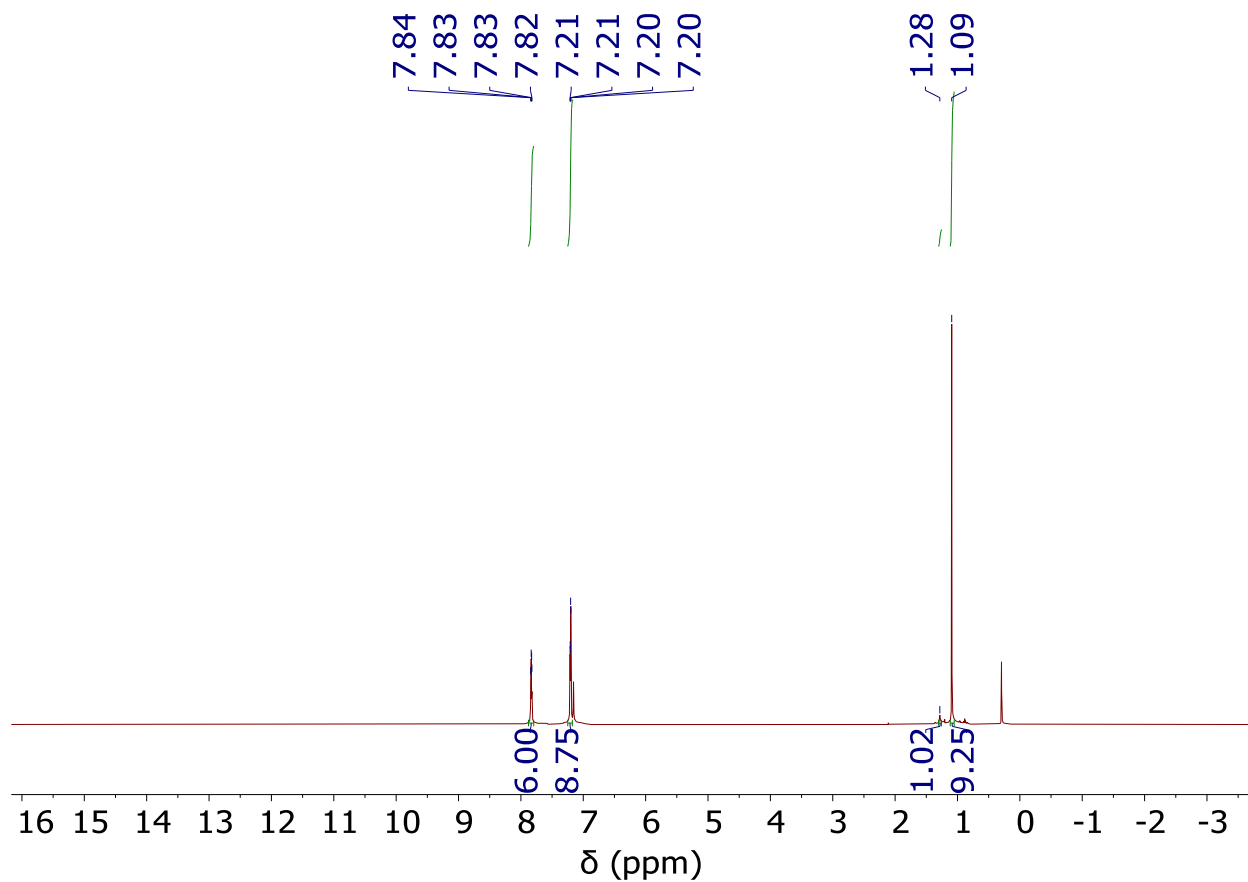

Figure S5.6. <sup>1</sup>H NMR spectrum for Ph<sub>3</sub>Si(NH<sup>t</sup>Bu).

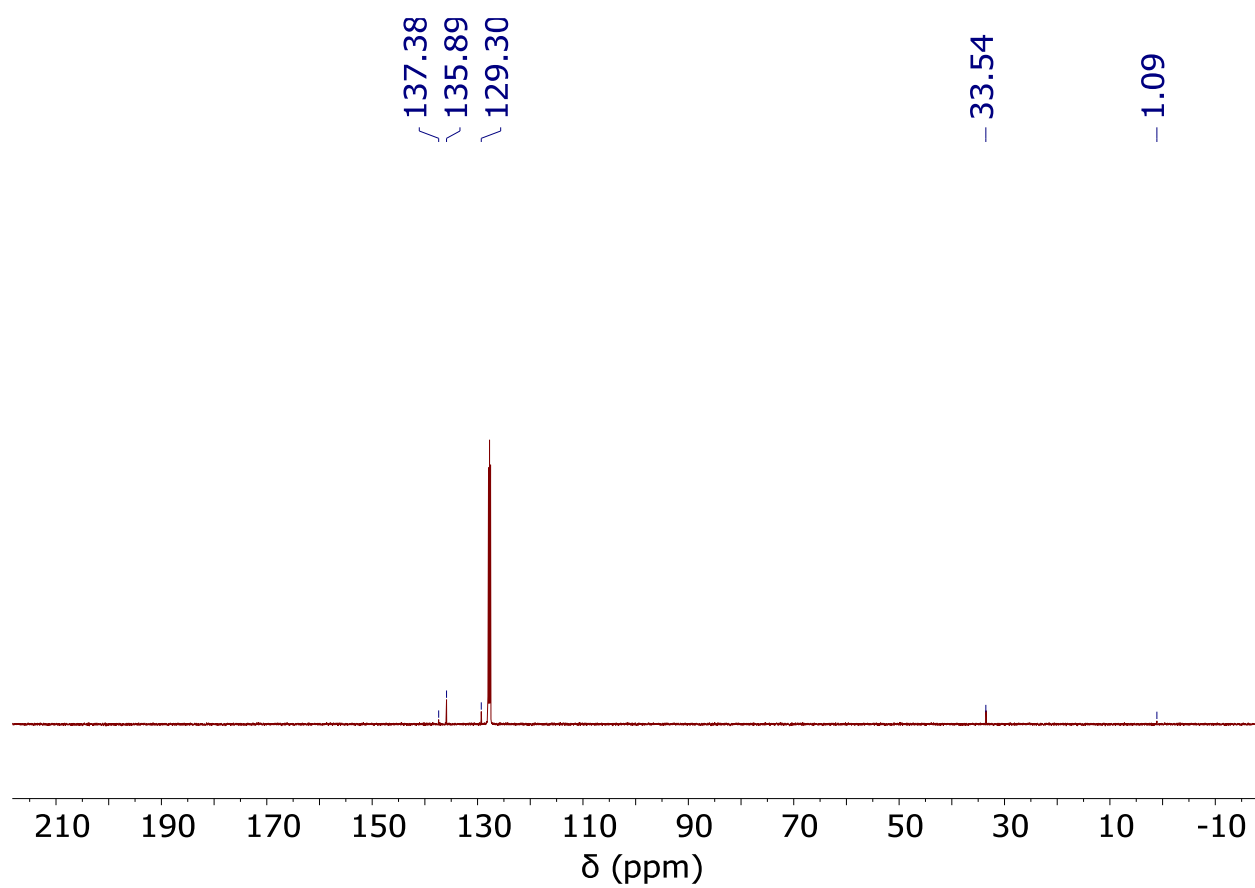

**Figure S5.7.**  $^{13}\text{C}\{^1\text{H}\}$  NMR spectrum for  $\text{Ph}_3\text{Si}(\text{NH}t\text{Bu})$ .

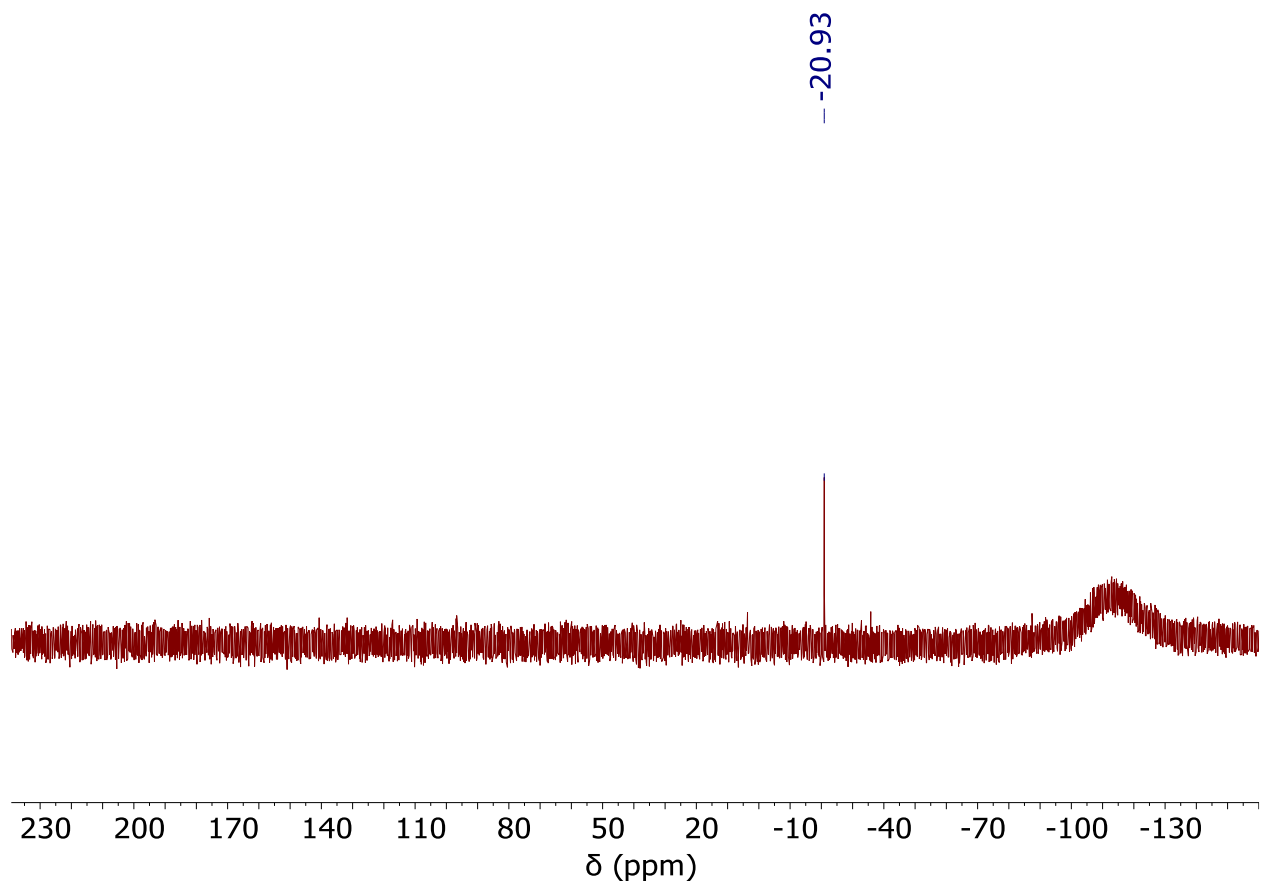

**Figure S5.8.**  $^{29}\text{Si}\{^1\text{H}\}$  NMR spectrum for  $\text{Ph}_3\text{Si}(\text{NH}^t\text{Bu})$ .

# Spectrum Plot Report

| Name           | Rack Pos.    | Instrument | Success | Operator          |
|----------------|--------------|------------|---------|-------------------|
| Inj. Vol. (ul) | Plate Pos.   | IRM Status |         |                   |
| Data File      | Method (Acq) | Comment    |         | Acq. Time (Local) |

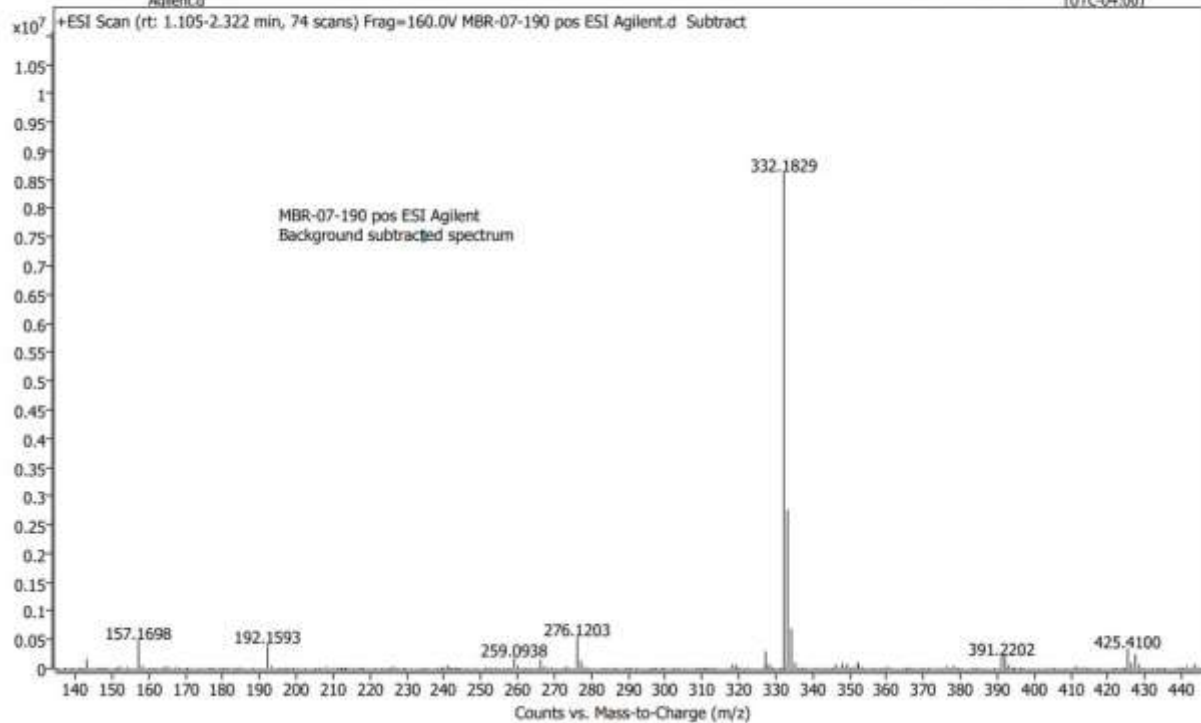

Figure S5.8. Full HRMS fragmentation spectrum for  $[\text{Ph}_3\text{Si}(\text{NH}t\text{Bu})+\text{H}]^+$ .

# Spectrum Plot Report

| Name                         | Rack Pos.    | Instrument | Operator                         |
|------------------------------|--------------|------------|----------------------------------|
| Inj. Vol. (ul)               | Plate Pos.   | IRM Status |                                  |
| Data File                    | Method (Acq) | Comment    | Success                          |
| MBR-07-190 pos ESI Agilent.d |              |            |                                  |
|                              |              |            | Acq. Time (Local)                |
|                              |              |            | 5/31/2023 1:38:07 PM (UTC-04:00) |

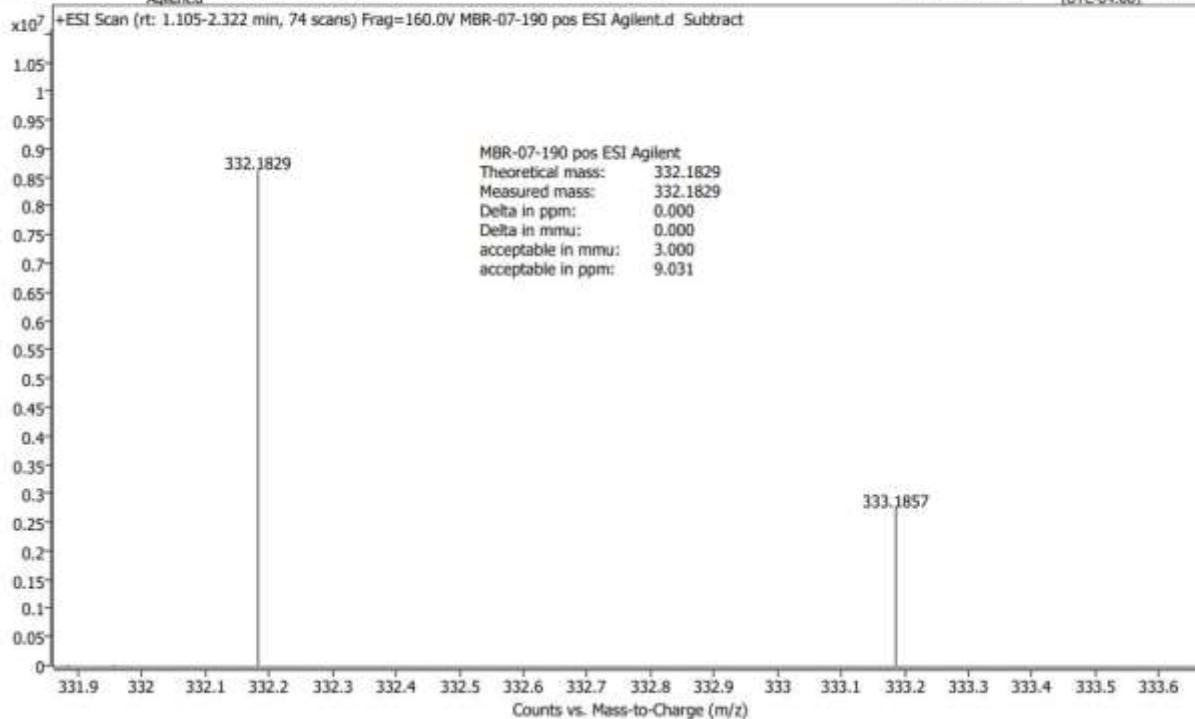

Figure S5.9. Background-subtracted HRMS fragmentation spectrum for  $[\text{Ph}_3\text{Si}(\text{NH}^t\text{Bu})+\text{H}]^+$ .

### S5.3. (*p*-MeO-C<sub>6</sub>H<sub>4</sub>)Ph<sub>2</sub>Si(NH<sup>t</sup>Bu)

Opaque oil (85.1 mg, 59% Yield). <sup>1</sup>H NMR (benzene-*d*<sub>6</sub>, 500 MHz): 7.87 (dd, *J* = 7.6, 1.9 Hz, 4H), 7.76 (d, *J* = 8.7 Hz, 2H), 7.23 (d, *J* = 7.5 Hz, 6H), 6.84 (d, *J* = 8.7 Hz, 2H), 3.30 (s, 3H), 1.30 (s, 1H), 1.13 (s, 9H). <sup>13</sup>C{<sup>1</sup>H} NMR (benzene-*d*<sub>6</sub>, 126 MHz): 161.01, 137.85, 137.46, 135.81, 129.18, 113.59, 54.18, 49.80, 33.55. <sup>29</sup>Si{<sup>1</sup>H} NMR (benzene-*d*<sub>6</sub>, 99 MHz): -20.95. HRMS (ESI) [M+H]<sup>+</sup> for C<sub>23</sub>H<sub>28</sub>NOSi<sup>+</sup>; calc'd: 362.1935, found: 362.1935.

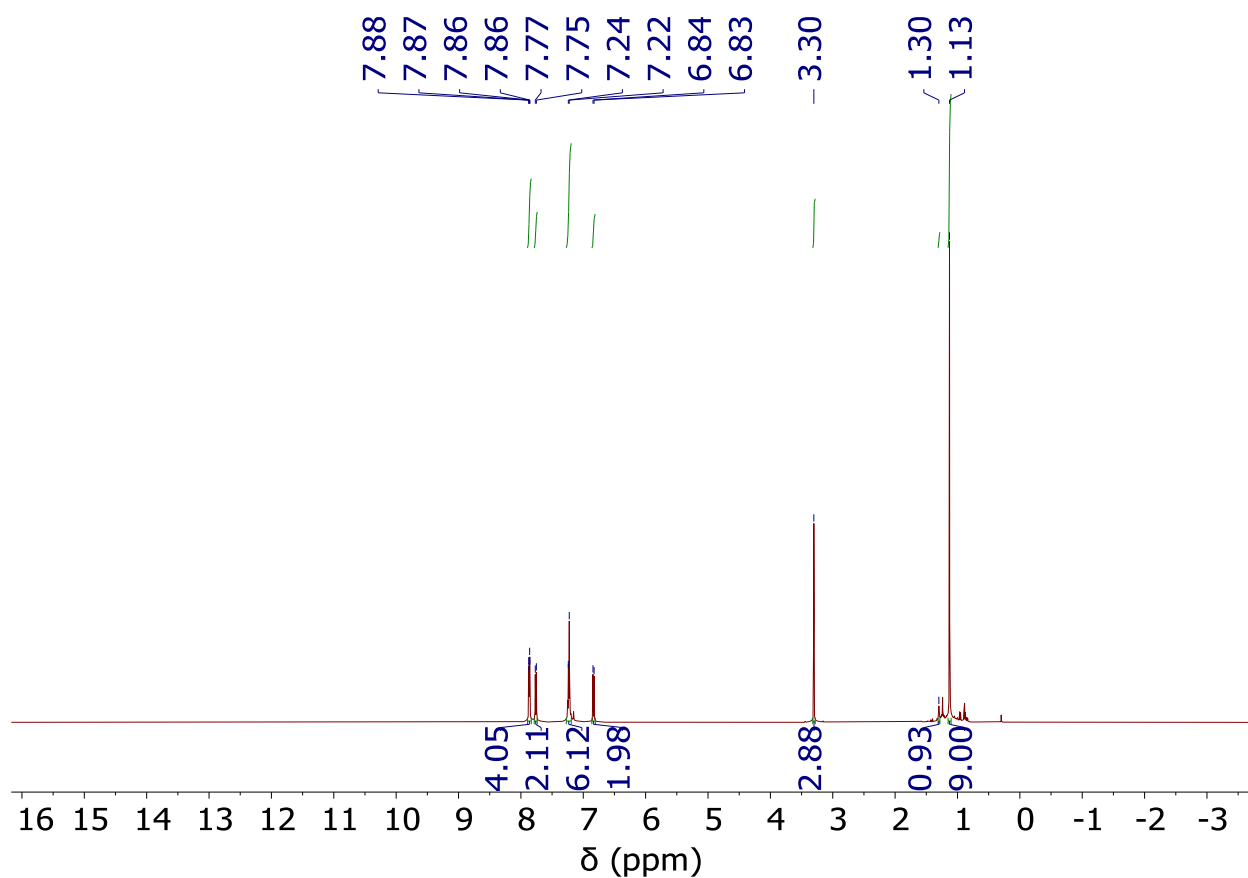

**Figure S5.10.** <sup>13</sup>C{<sup>1</sup>H} NMR spectrum for (*p*-MeO-C<sub>6</sub>H<sub>4</sub>)Ph<sub>2</sub>Si(NH<sup>t</sup>Bu).



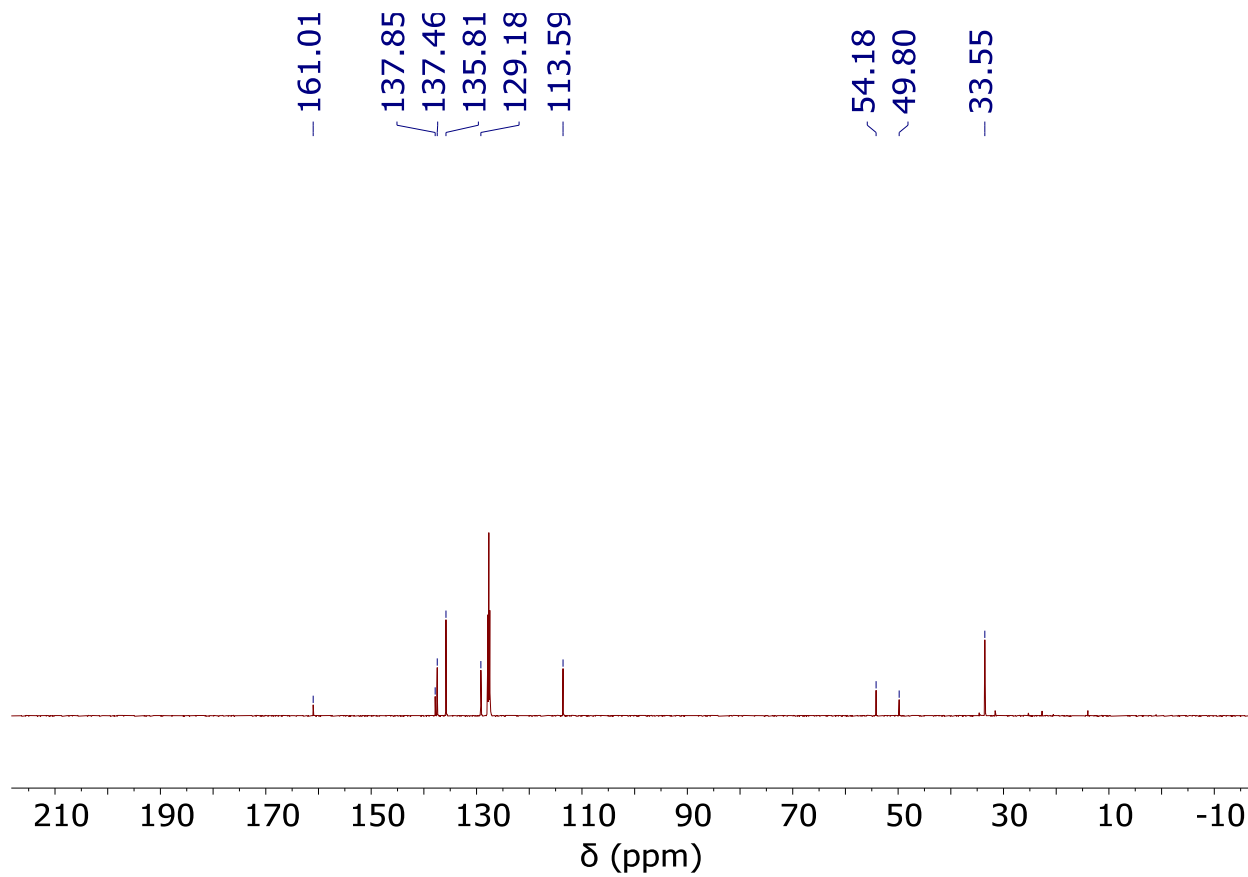

**Figure S5.11.**  $^{13}\text{C}\{^1\text{H}\}$  NMR spectrum for  $(p\text{-MeO-C}_6\text{H}_4)\text{Ph}_2\text{Si}(\text{NH}t\text{Bu})$ .

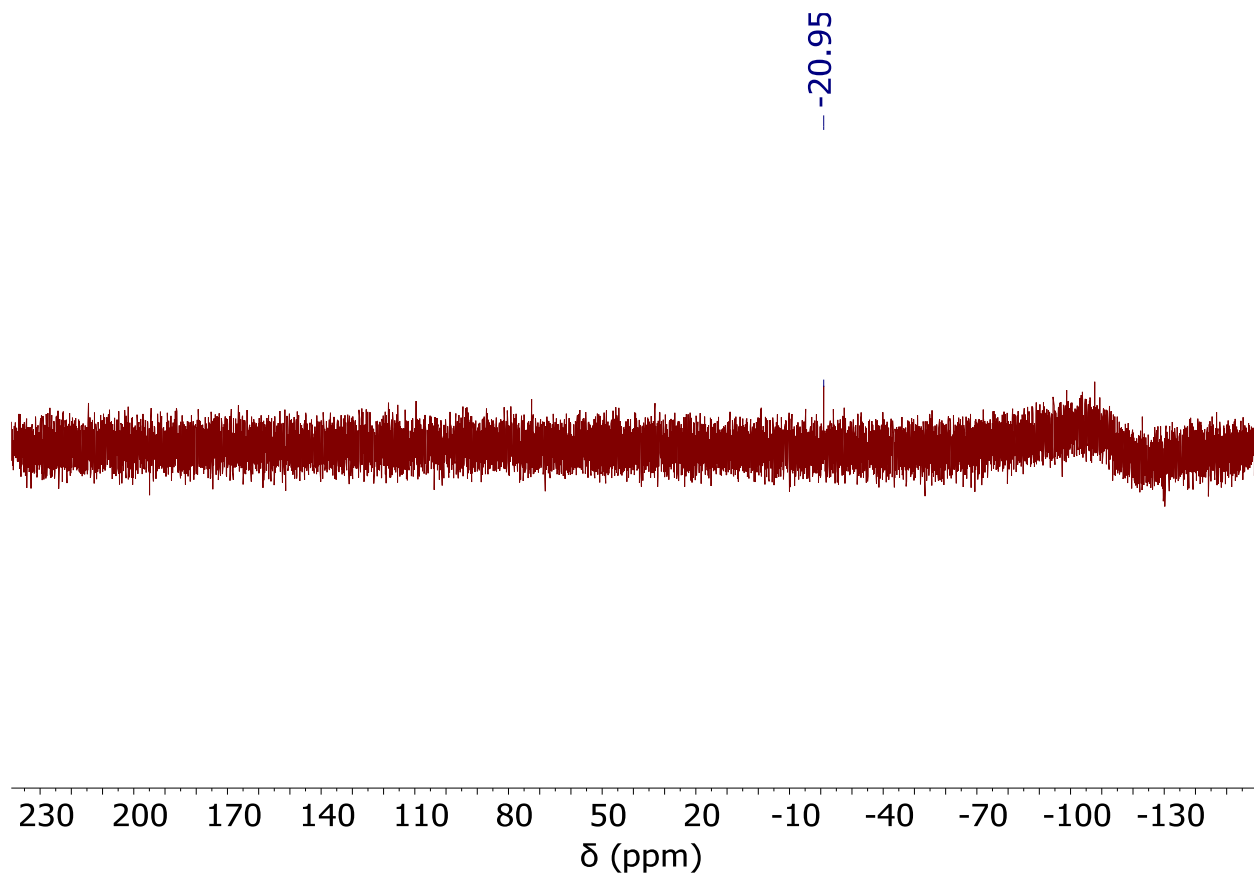

**Figure S5.12.**  $^{29}\text{Si}\{^1\text{H}\}$  NMR spectrum for  $(p\text{-MeO-C}_6\text{H}_4)\text{Ph}_2\text{Si}(\text{NH}^t\text{Bu})$ .

# Spectrum Plot Report

|                |                              |              |                        |                 |                   |                                  |
|----------------|------------------------------|--------------|------------------------|-----------------|-------------------|----------------------------------|
| Name           | Chem HRMS                    | Rack Pos.    | Instrument             | DESKTOP-NE620FS | Operator          | SYSTEM (SYSTEM)                  |
| Inj. Vol. (uL) | 0                            | Plate Pos.   | IRM Status             | Success         |                   |                                  |
| Data File      | MBR-07-210 pos ESI Agilent.d | Method (Acq) | Direct Infusion 6min.m | Comment         | Acq. Time (Local) | 5/31/2023 1:25:03 PM (UTC-04:00) |

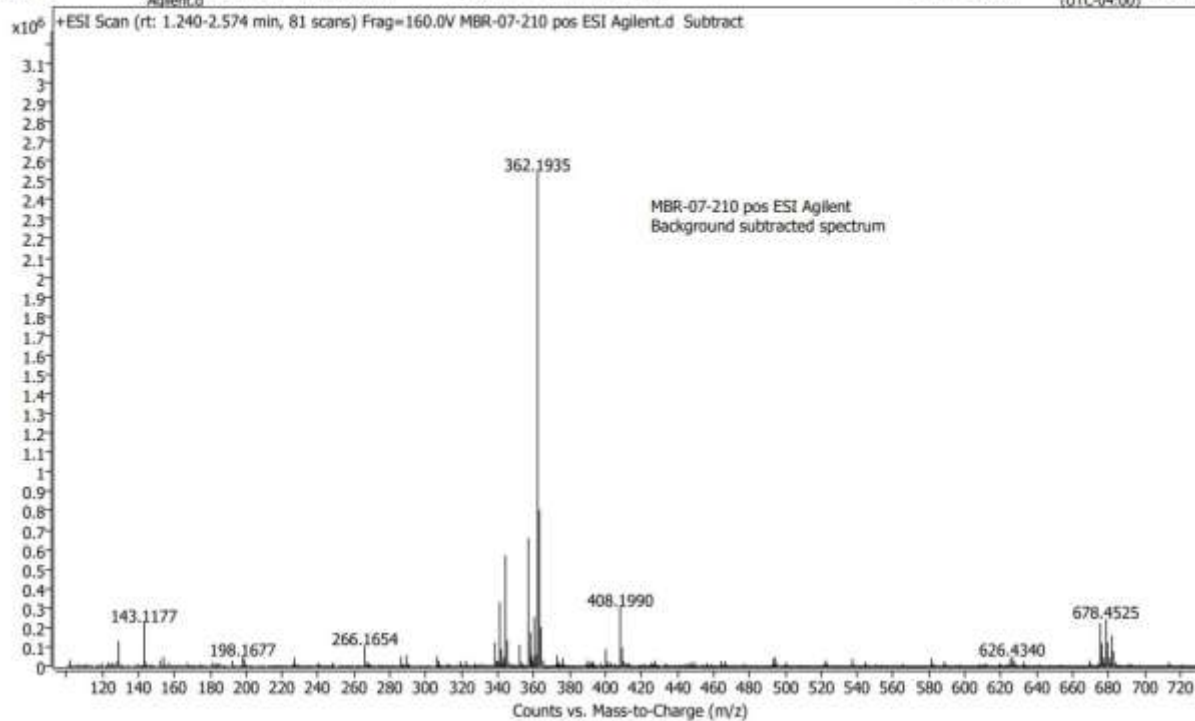

**Figure S5.13.** Full HRMS fragmentation spectrum for  $[(p\text{-MeO-C}_6\text{H}_4)_2\text{Si}(\text{NHtBu})+\text{H}]^+$ .

# Spectrum Plot Report

|                |                              |              |                        |                 |                   |                                  |
|----------------|------------------------------|--------------|------------------------|-----------------|-------------------|----------------------------------|
| Name           | Chem HRMS                    | Rack Pos.    | Instrument             | DESKTOP-NE620FS | Operator          | SYSTEM (SYSTEM)                  |
| Inj. Vol. (ul) | 0                            | Plate Pos.   | IRM Status             | Success         |                   |                                  |
| Data File      | MBR-07-210 pos ESI Agilent.d | Method (Acq) | Direct Infusion 6min.m | Comment         | Acq. Time (Local) | 5/31/2023 1:25:03 PM (UTC-04:00) |

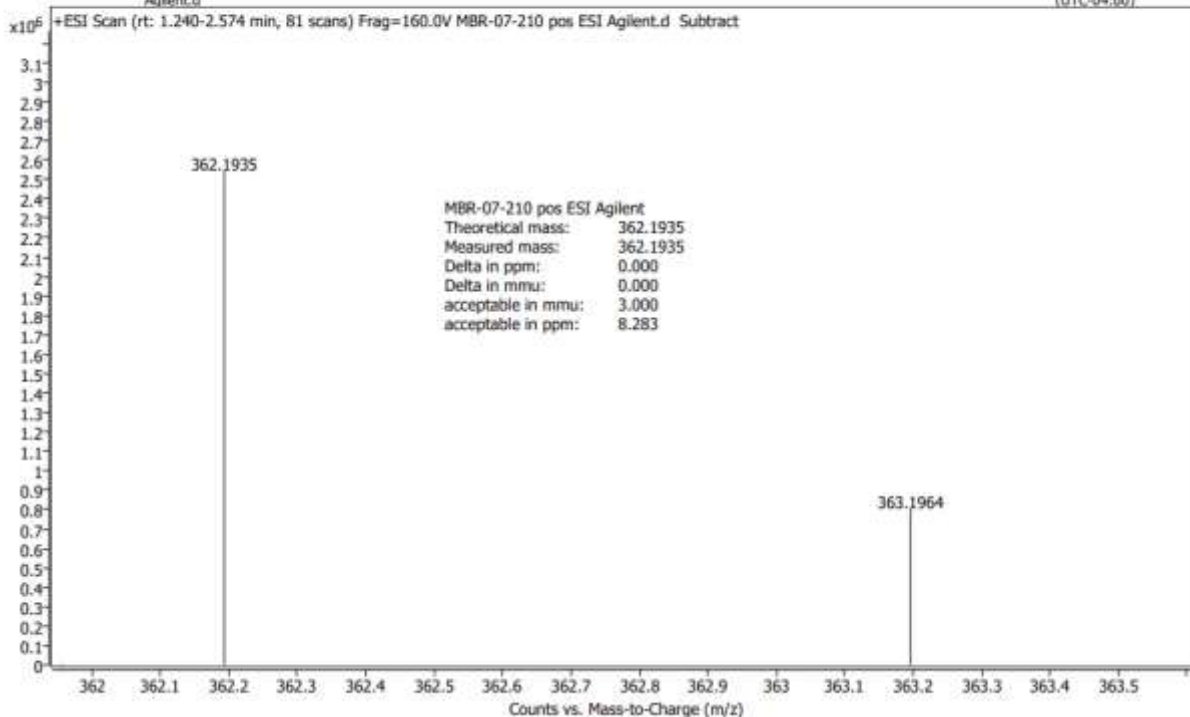

**Figure S5.14.** Background-subtracted HRMS fragmentation spectrum for  $[(p\text{-MeO-C}_6\text{H}_4)_2\text{Ph}_2\text{Si}(\text{NH}^t\text{Bu})+\text{H}]^+$ .

#### S5.4. (*p*-Me-C<sub>6</sub>H<sub>4</sub>)Ph<sub>2</sub>Si(NH*t*Bu)

Opaque oil (17.9 mg, 15% Yield). <sup>1</sup>H NMR (benzene-*d*<sub>6</sub>, 500 MHz): 7.86 (dd, *J* = 6.9, 2.5 Hz, 4H), 7.78 (d, *J* = 8.1 Hz, 2H), 7.30-7.17 (m, 6H), 7.07 (d, *J* = 7.5 Hz, 2H), 2.12 (s, 3H), 1.31 (s, 1H), 1.12 (s, 9H). <sup>13</sup>C{<sup>1</sup>H} NMR (benzene-*d*<sub>6</sub>, 126 MHz): 139.33, 138.04, 136.40, 136.22, 134.08, 129.59, 128.95, 50.20, 33.92, 21.49. <sup>29</sup>Si{<sup>1</sup>H} NMR (benzene-*d*<sub>6</sub>, 99 MHz): -20.26. HRMS (ESI) [M+H]<sup>+</sup> for C<sub>23</sub>H<sub>28</sub>NSi<sup>+</sup>; calc'd: 346.1986, found: 346.1987.

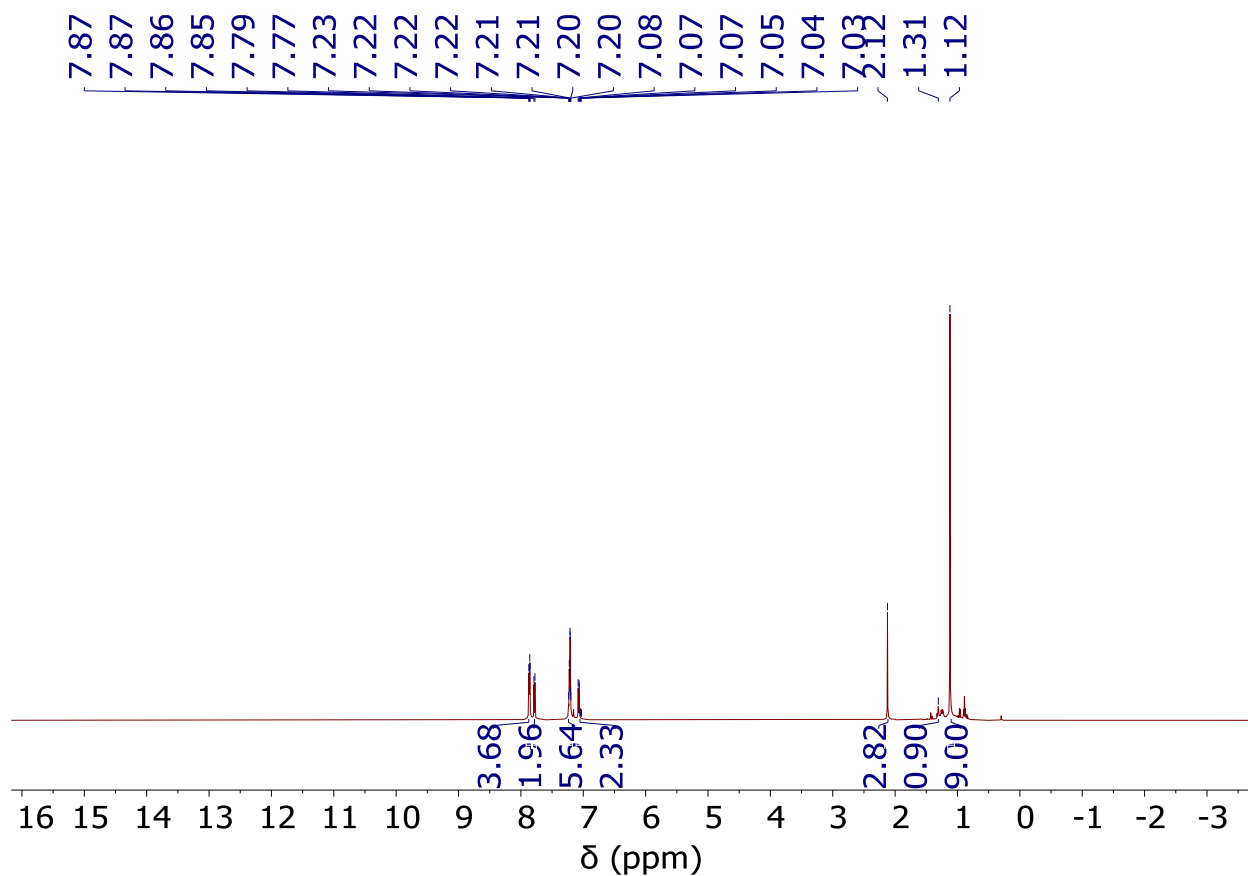

Figure S5.15. <sup>1</sup>H NMR spectrum for (*p*-Me-C<sub>6</sub>H<sub>4</sub>)Ph<sub>2</sub>Si(NH*t*Bu).

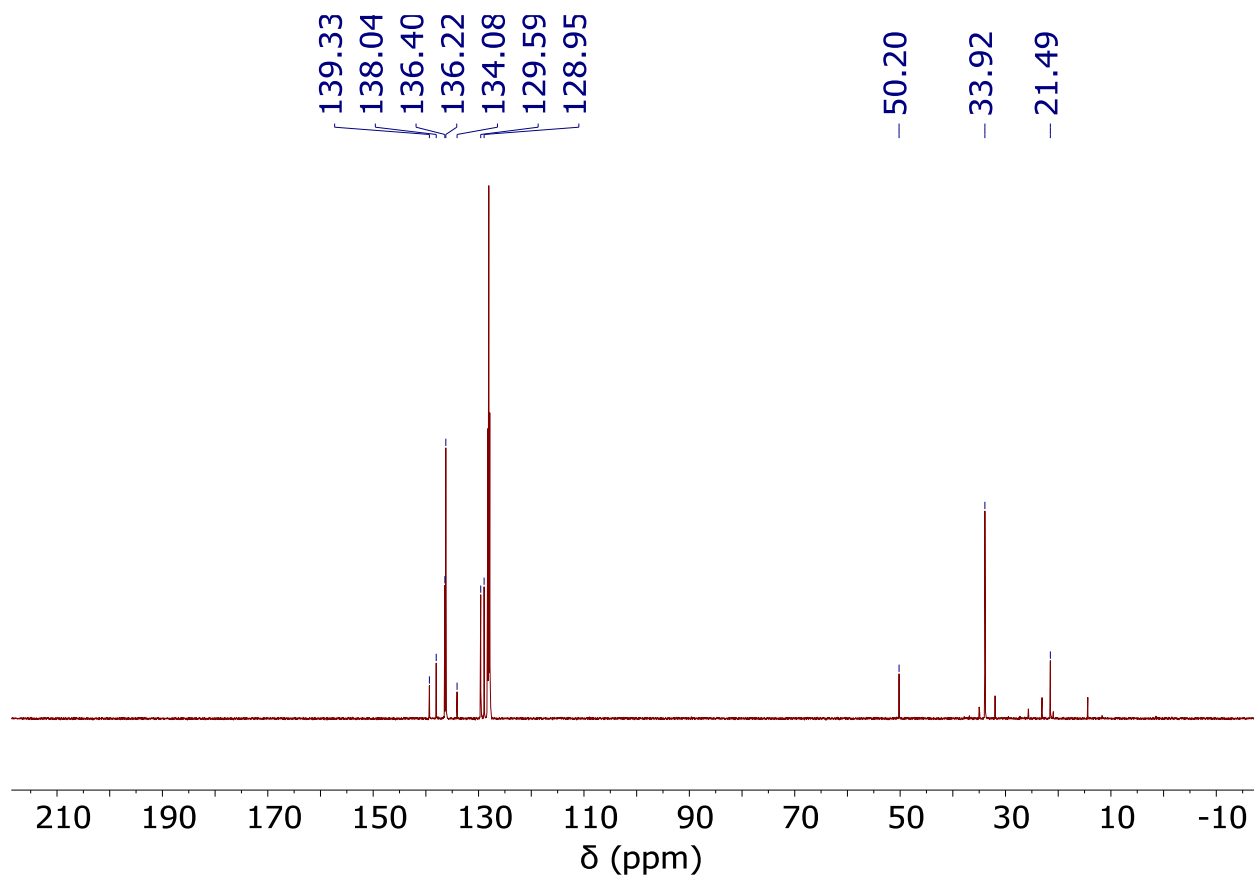

**Figure S5.16.**  $^{13}\text{C}\{^1\text{H}\}$  NMR spectrum for  $(p\text{-Me-C}_6\text{H}_4)_2\text{Si}(\text{NH}^t\text{Bu})$ .

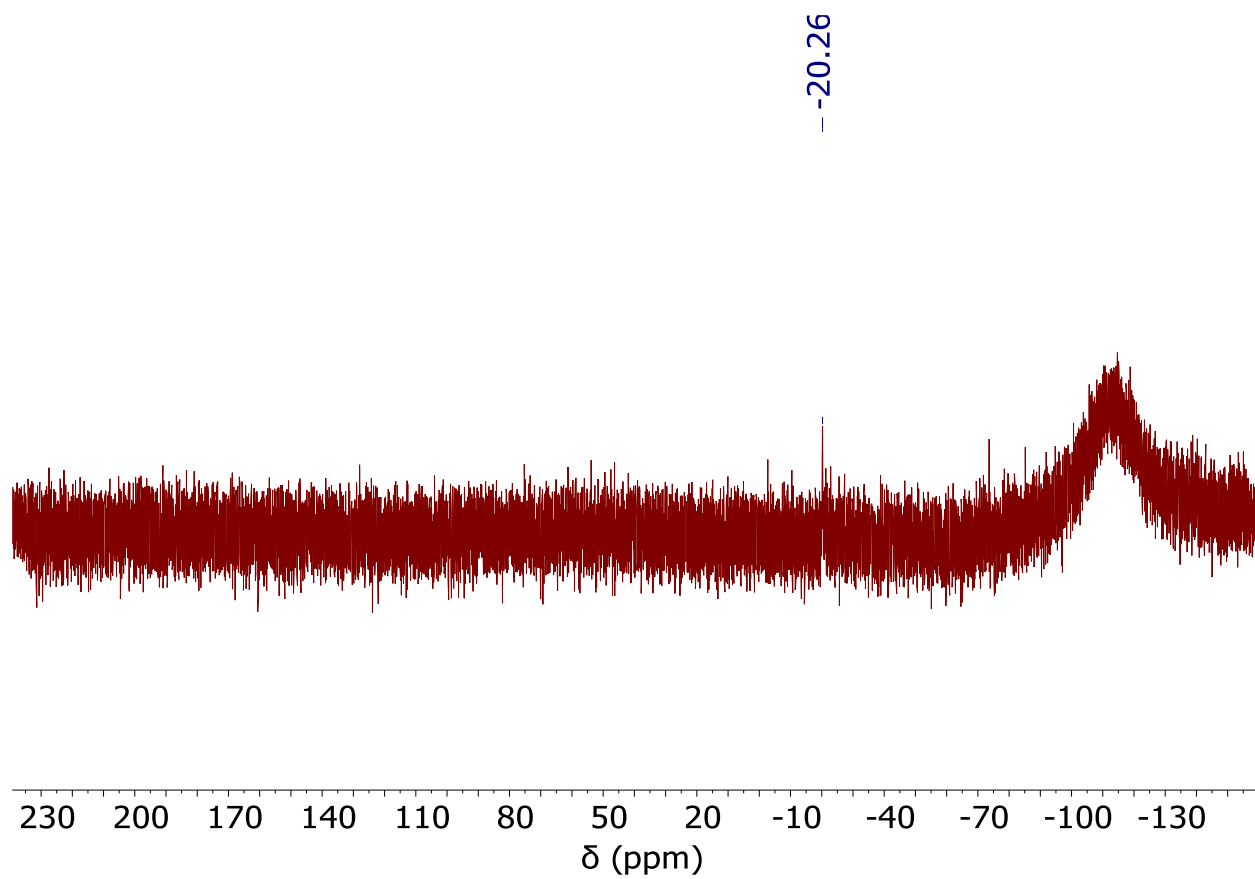

**Figure S5.17.**  $^{29}\text{Si}\{^1\text{H}\}$  NMR spectrum for  $(p\text{-Me-C}_6\text{H}_4)_2\text{Si}(\text{NH}t\text{Bu})$ .

# Spectrum Plot Report

| Name                         | Rack Pos.    | Instrument | Success | Operator                         |
|------------------------------|--------------|------------|---------|----------------------------------|
| Inj. Vol. (ul)               | Plate Pos.   | IRM Status |         |                                  |
| Data File                    | Method (Acq) | Comment    |         | Acq. Time (Local)                |
| MBR-07-211 pos ESI Agilent.d |              |            |         | 5/31/2023 1:18:04 PM (UTC-04:00) |

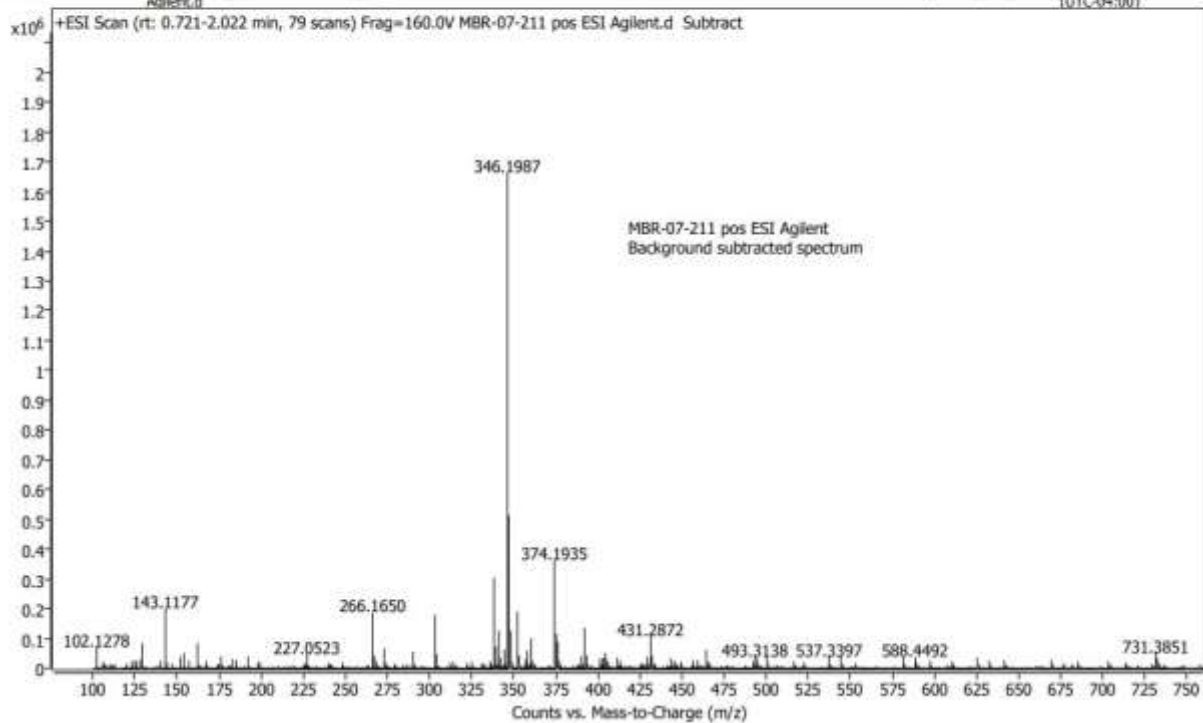

**Figure S5.18.** Full HRMS fragmentation spectrum for  $[(p\text{-Me-C}_6\text{H}_4)\text{Ph}_2\text{Si}(\text{NH}^t\text{Bu})+\text{H}]^+$ .



# Spectrum Plot Report

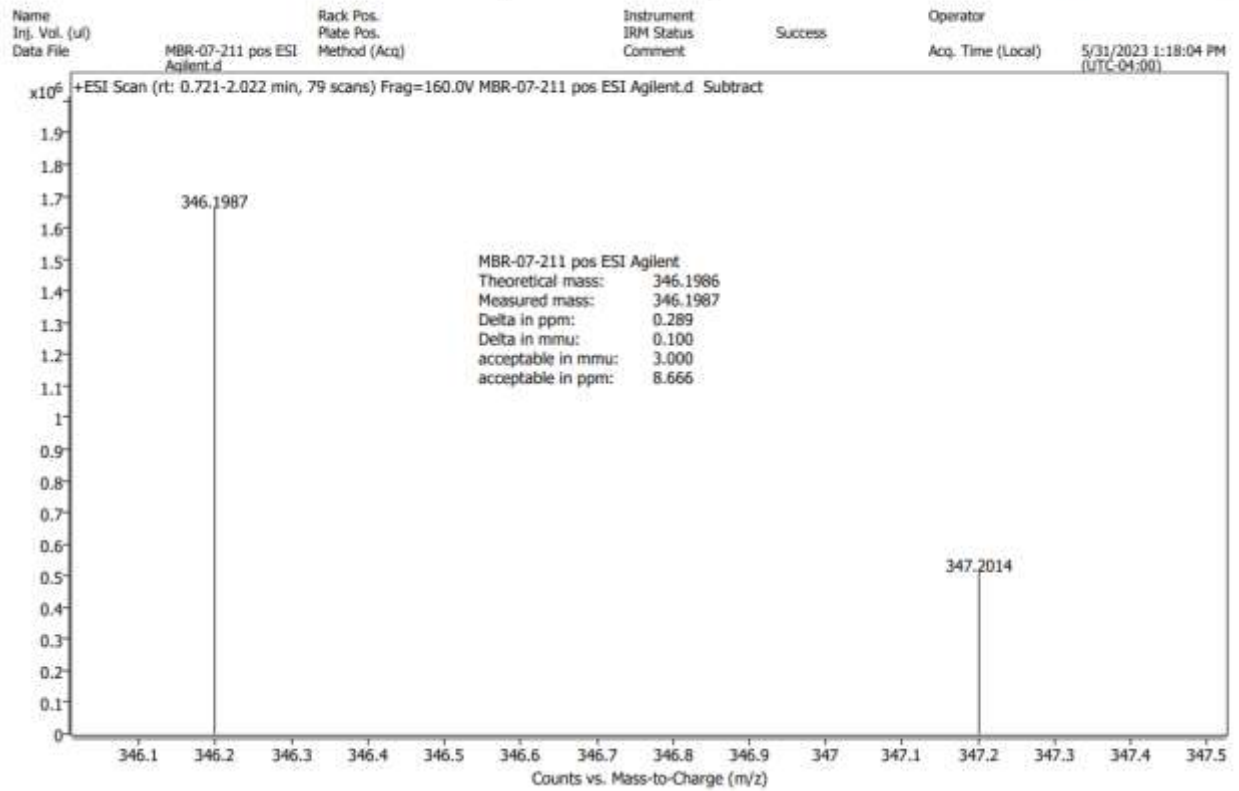

**Figure S5.19.** Background-subtracted HRMS fragmentation spectrum for  $[(p\text{-Me-C}_6\text{H}_4)\text{Ph}_2\text{Si}(\text{NH}t\text{Bu})+\text{H}]^+$ .

### S5.5. (*p*-F<sub>3</sub>C-C<sub>6</sub>H<sub>4</sub>)Ph<sub>2</sub>Si(NH<sup>t</sup>Bu)

Opaque oil (92.9 mg, 82% Yield). <sup>1</sup>H NMR (benzene-*d*<sub>6</sub>, 500 MHz): 7.75-7.67 (m, 6H), 7.38 (d, *J* = 8.2 Hz, 2H), 7.24-7.17 (m, 6H), 1.36 (s, 1H), 1.05 (s, 9H). <sup>13</sup>C{<sup>1</sup>H} NMR (benzene-*d*<sub>6</sub>, 126 MHz): 142.46, 136.29, 136.03, 135.68, 129.60, 124.12, 49.87, 33.41. <sup>19</sup>F{<sup>1</sup>H} NMR (benzene-*d*<sub>6</sub>, 471 MHz): -61.34. <sup>29</sup>Si{<sup>1</sup>H} NMR (benzene-*d*<sub>6</sub>, 99 MHz): -21.42. HRMS (ESI) [M+H]<sup>+</sup> for C<sub>23</sub>H<sub>25</sub>F<sub>3</sub>NSi<sup>+</sup>; calc'd: 500.1703, found: 400.1706.

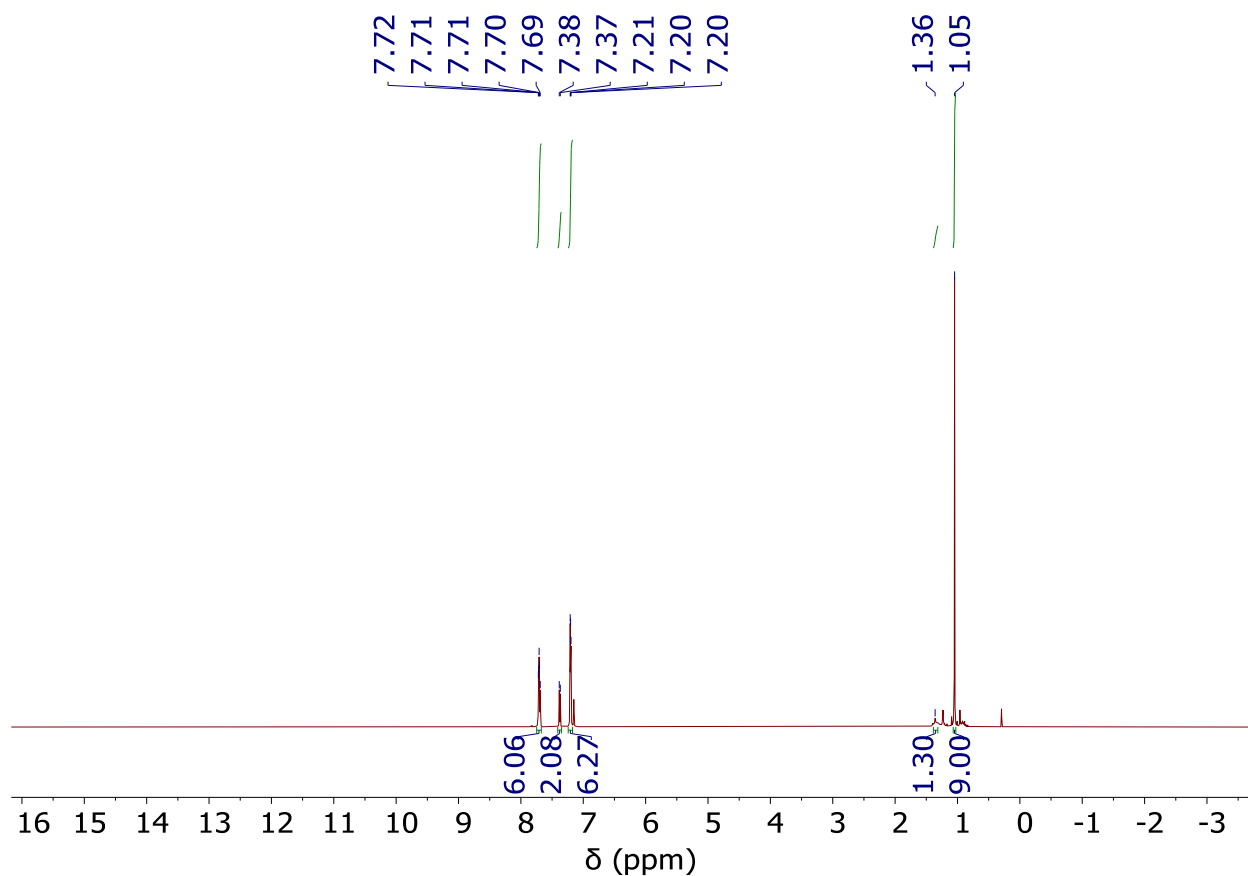

**Figure S5.20.** <sup>1</sup>H NMR spectrum for (*p*-F<sub>3</sub>C-C<sub>6</sub>H<sub>4</sub>)Ph<sub>2</sub>Si(NH<sup>t</sup>Bu).

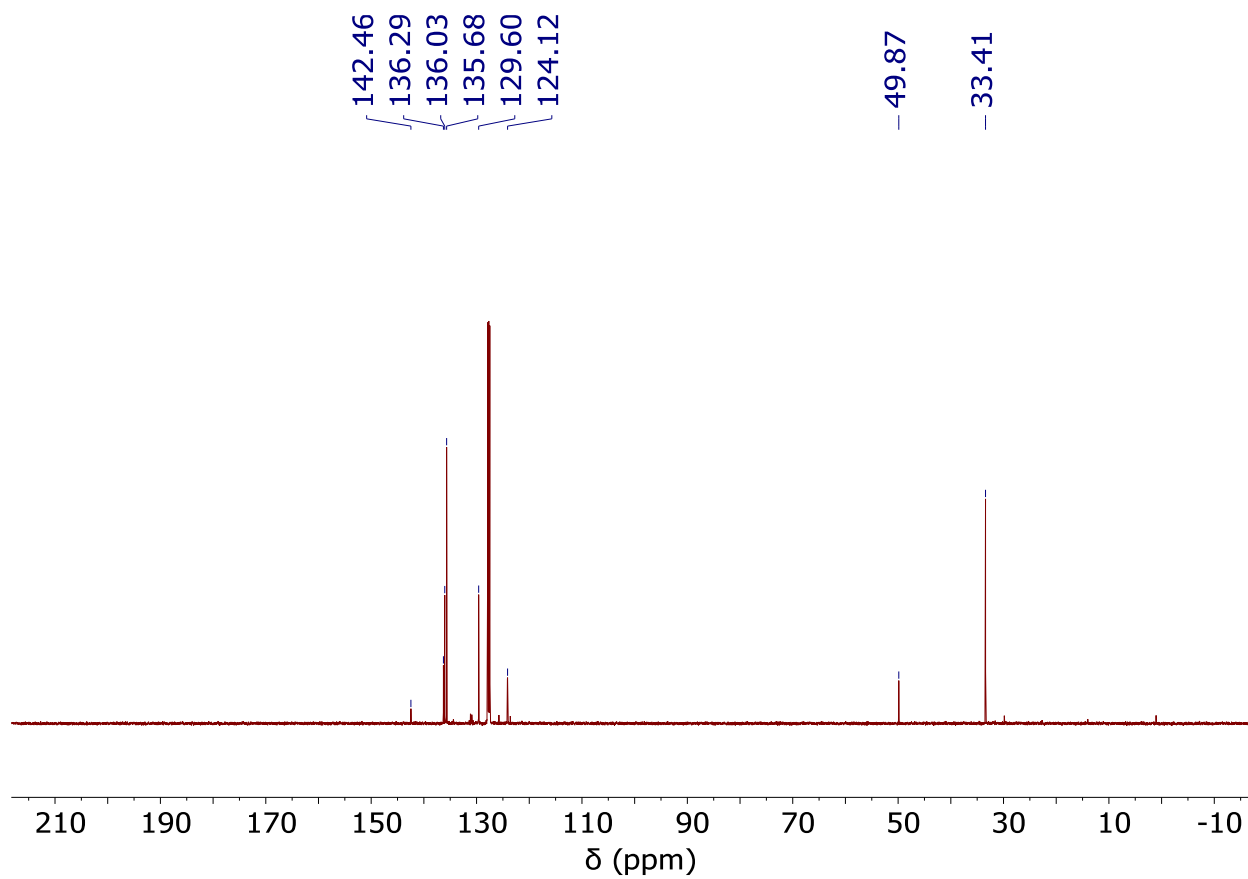

**Figure S5.21.**  $^{13}\text{C}\{^1\text{H}\}$  NMR spectrum for  $(p\text{-F}_3\text{C-C}_6\text{H}_4)_2\text{Si}(\text{NHtBu})$ .

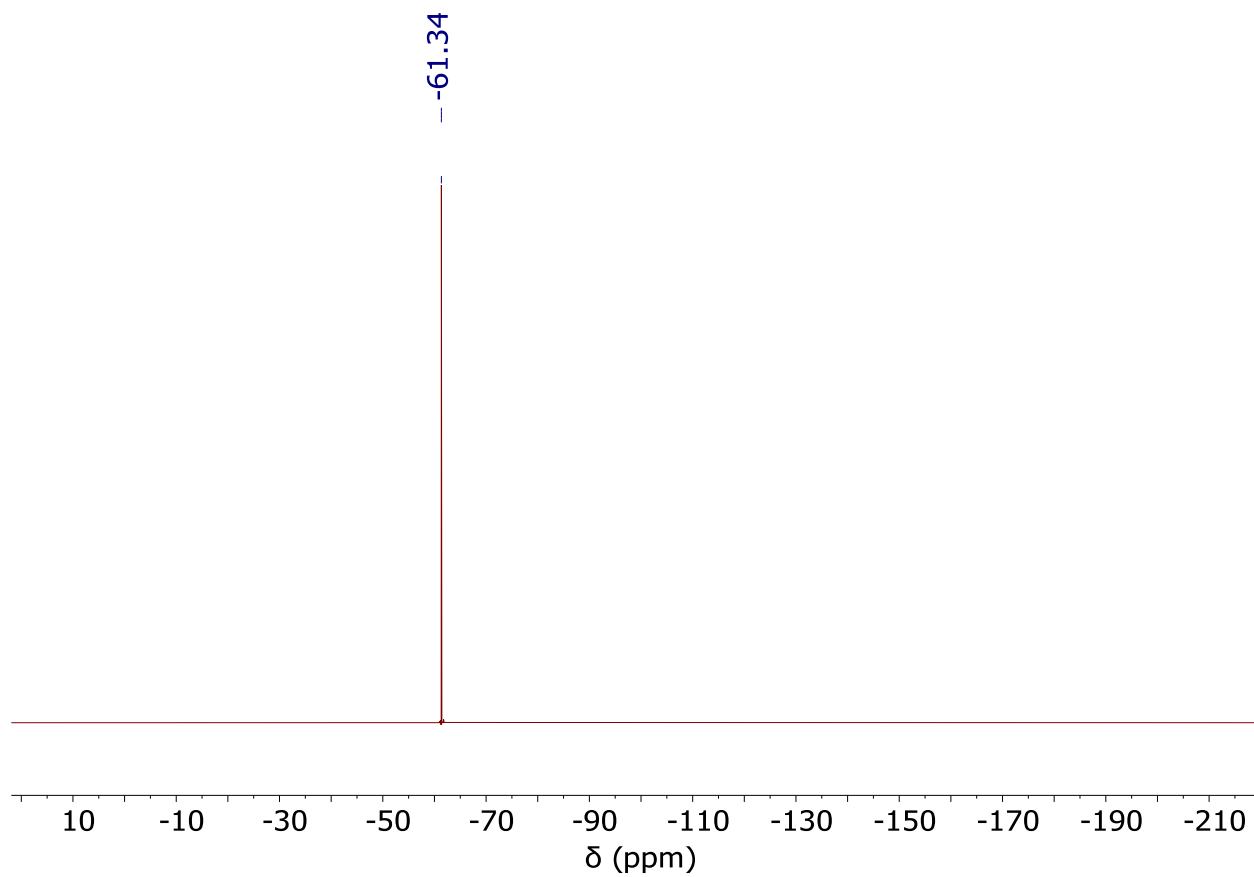

**Figure S5.22.**  $^{19}\text{F}\{^1\text{H}\}$  NMR spectrum for  $(p\text{-F}_3\text{C-C}_6\text{H}_4)\text{Ph}_2\text{Si}(\text{NH}^t\text{Bu})$ .

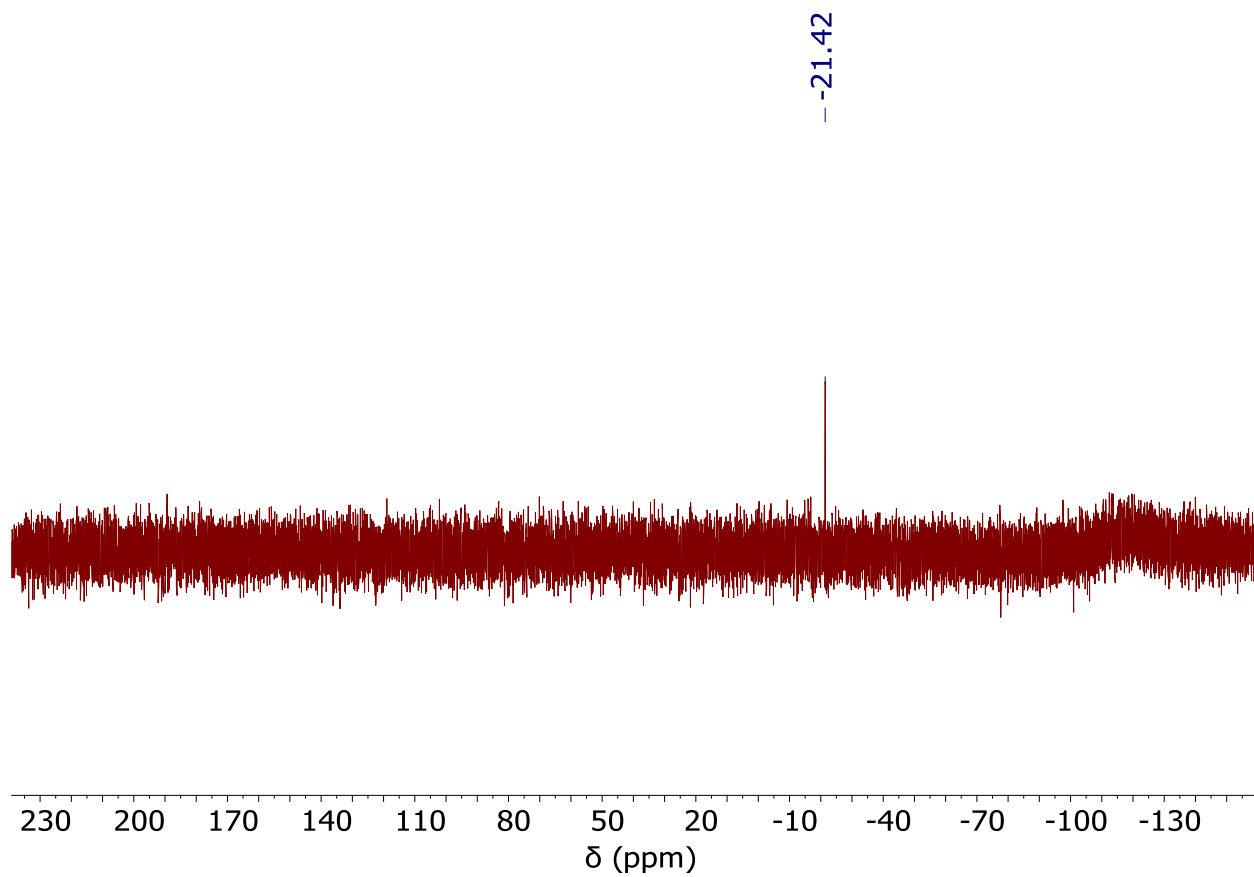

**Figure S5.23.**  $^{29}\text{Si}\{^1\text{H}\}$  NMR spectrum for  $(p\text{-F}_3\text{C-C}_6\text{H}_4)\text{Ph}_2\text{Si}(\text{NH}^t\text{Bu})$ .

# Spectrum Plot Report

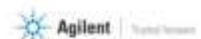

| Name           | Rack Pos.                               | Instrument           | Operator          |
|----------------|-----------------------------------------|----------------------|-------------------|
| Inj. Vol. (ul) | Plate Pos. <td>IRM Status<td></td></td> | IRM Status <td></td> |                   |
| Data File      | Method (Acq)                            | Comment              | Acq. Time (Local) |

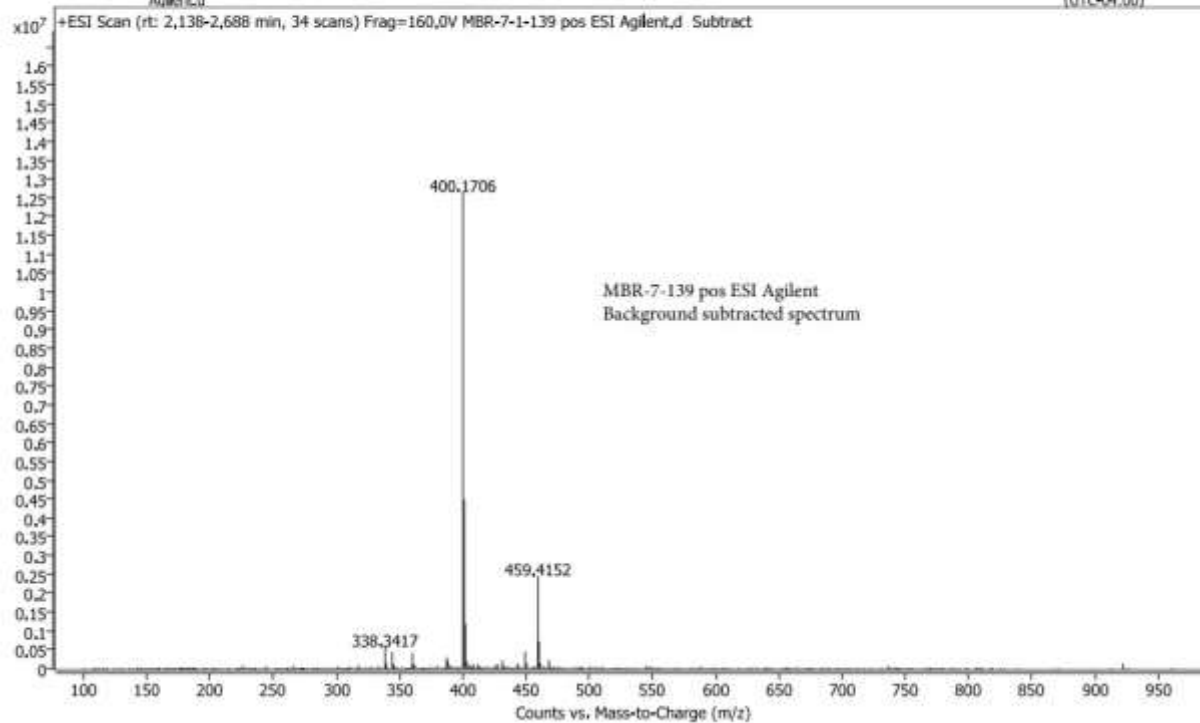

**Figure S5.24.** Full HRMS fragmentation spectrum for  $[(p\text{-F}_3\text{C-C}_6\text{H}_4)\text{Ph}_2\text{Si}(\text{NH}^+\text{Bu})+\text{H}]^+$ .

# Spectrum Plot Report

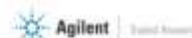

| Name                          | Rack Pos.    | Instrument | Operator                                           |
|-------------------------------|--------------|------------|----------------------------------------------------|
| Inj. Vol. (ul)                | Plate Pos.   | IRM Status |                                                    |
| Data File                     | Method (Acq) | Comment    | Success                                            |
| MBR-7-1-139 pos ESI Agilent.d |              |            | Acq. Time (Local) 4/21/2023 9:53:14 AM (UTC-04:00) |

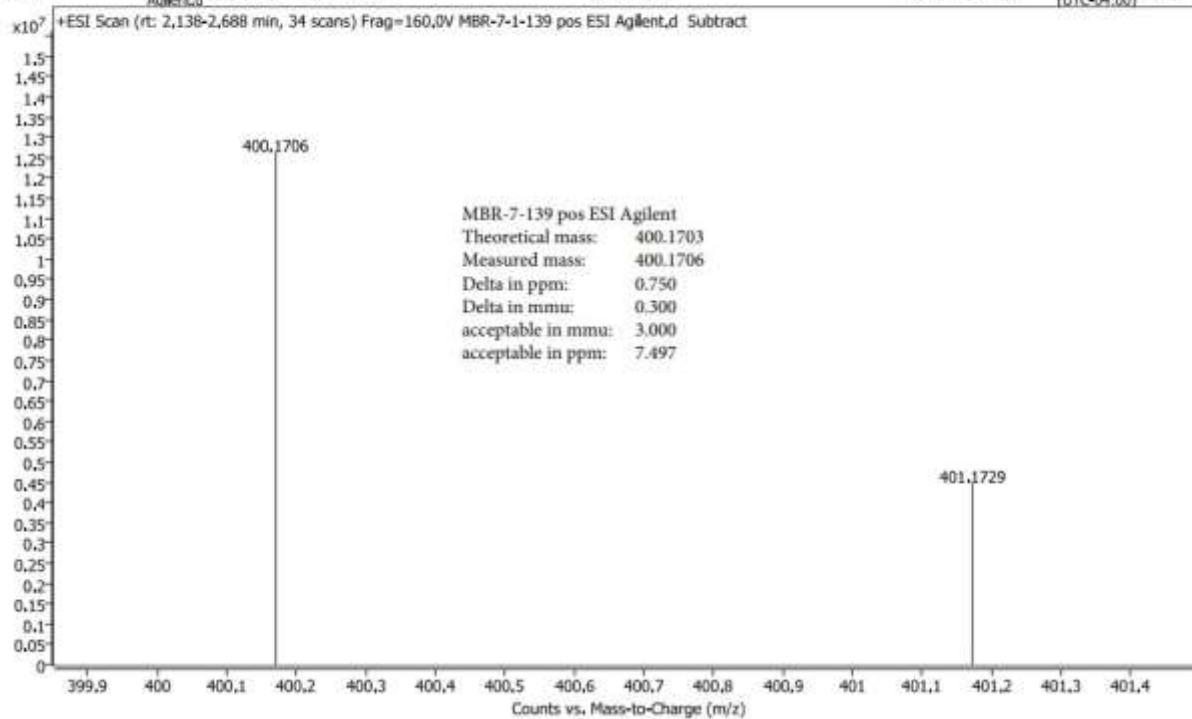

**Figure S5.25.** Background-subtracted HRMS fragmentation spectrum for  $[(p\text{-F}_3\text{C-C}_6\text{H}_4)\text{Ph}_2\text{Si}(\text{NH}t\text{Bu})+\text{H}]^+$ .

### S5.6. Ph<sub>3</sub>Si(NEt<sub>2</sub>)

White solid (84.4 mg, 68% yield). <sup>1</sup>H NMR (benzene-*d*<sub>6</sub>, 500 MHz): 7.78-7.76 (m, 6H), 7.22-7.21 (m, 9H), 3.03-2.98 (q, *J* = 7.1 Hz, 4H), 0.96 (t, *J* = 7.0 Hz, 6H). <sup>13</sup>C{<sup>1</sup>H} NMR (benzene-*d*<sub>6</sub>, 126 MHz): 136.18, 129.45, 127.80, 40.50, 15.06. <sup>29</sup>Si{<sup>1</sup>H} NMR (benzene-*d*<sub>6</sub>, 99 MHz): -12.45. HRMS (ESI) [M+H]<sup>+</sup> for C<sub>22</sub>H<sub>26</sub>NSi<sup>+</sup>; calc'd: 332.1829, found: 332.1831.

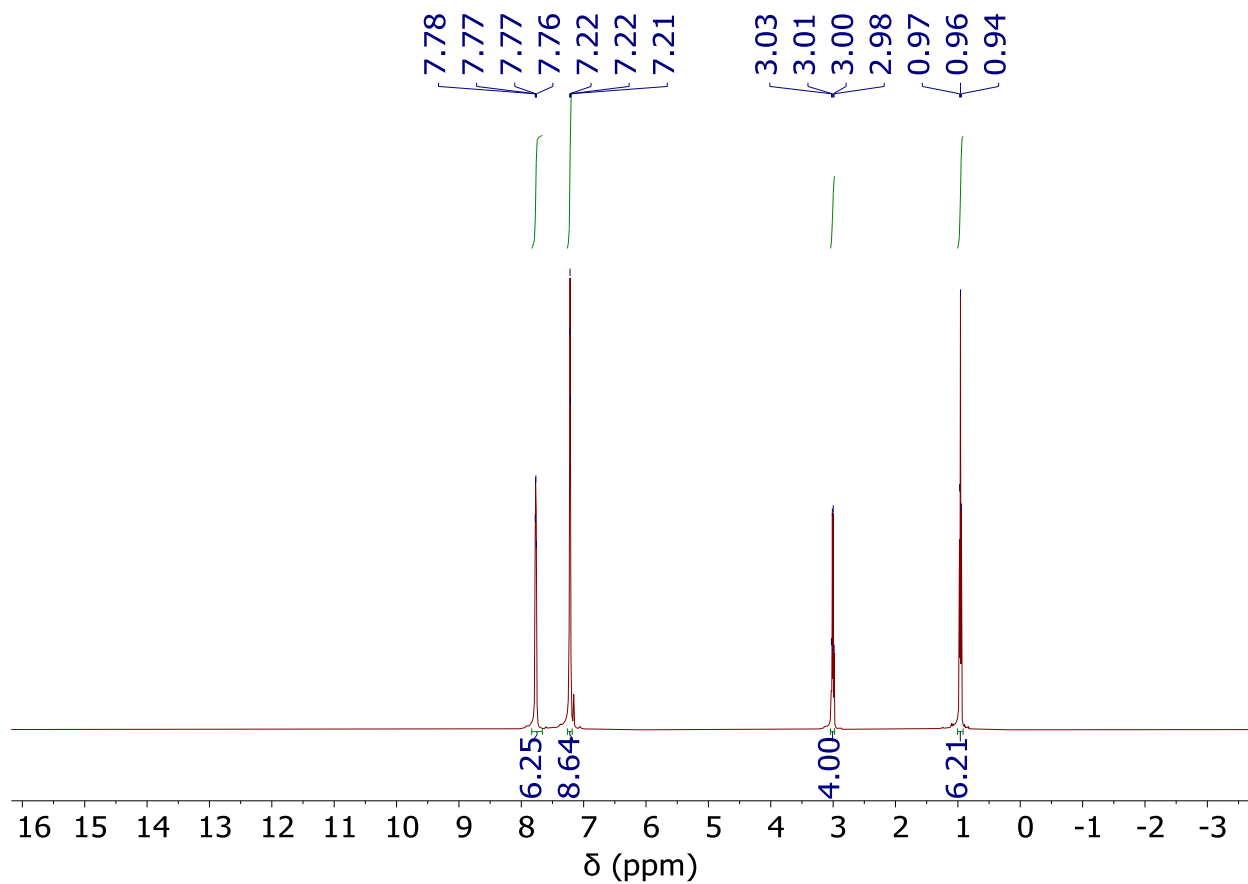

Figure S5.26. <sup>1</sup>H NMR spectrum for Ph<sub>3</sub>Si(NEt<sub>2</sub>).



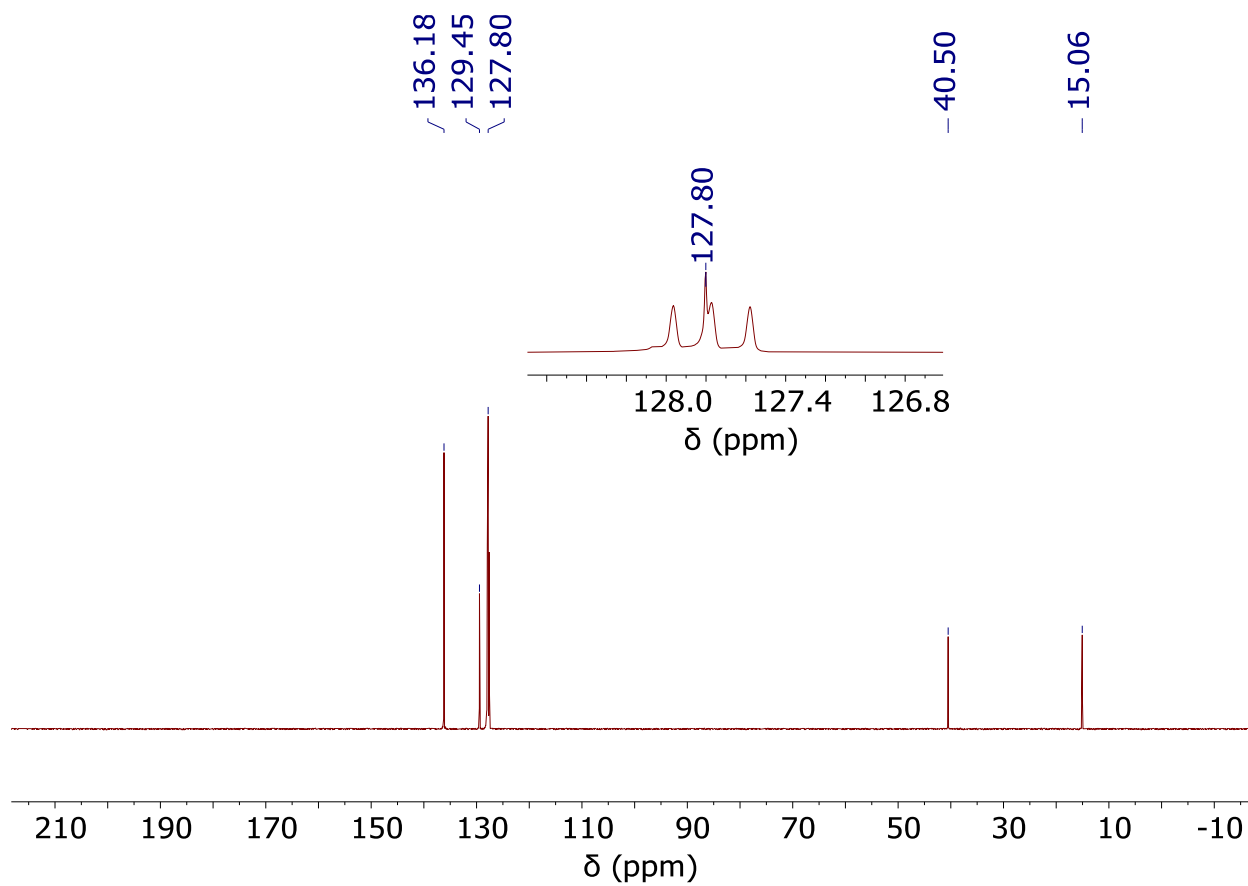

**Figure S5.27.**  $^{13}\text{C}\{^1\text{H}\}$  NMR spectrum for  $\text{Ph}_3\text{Si}(\text{NEt}_2)$ .

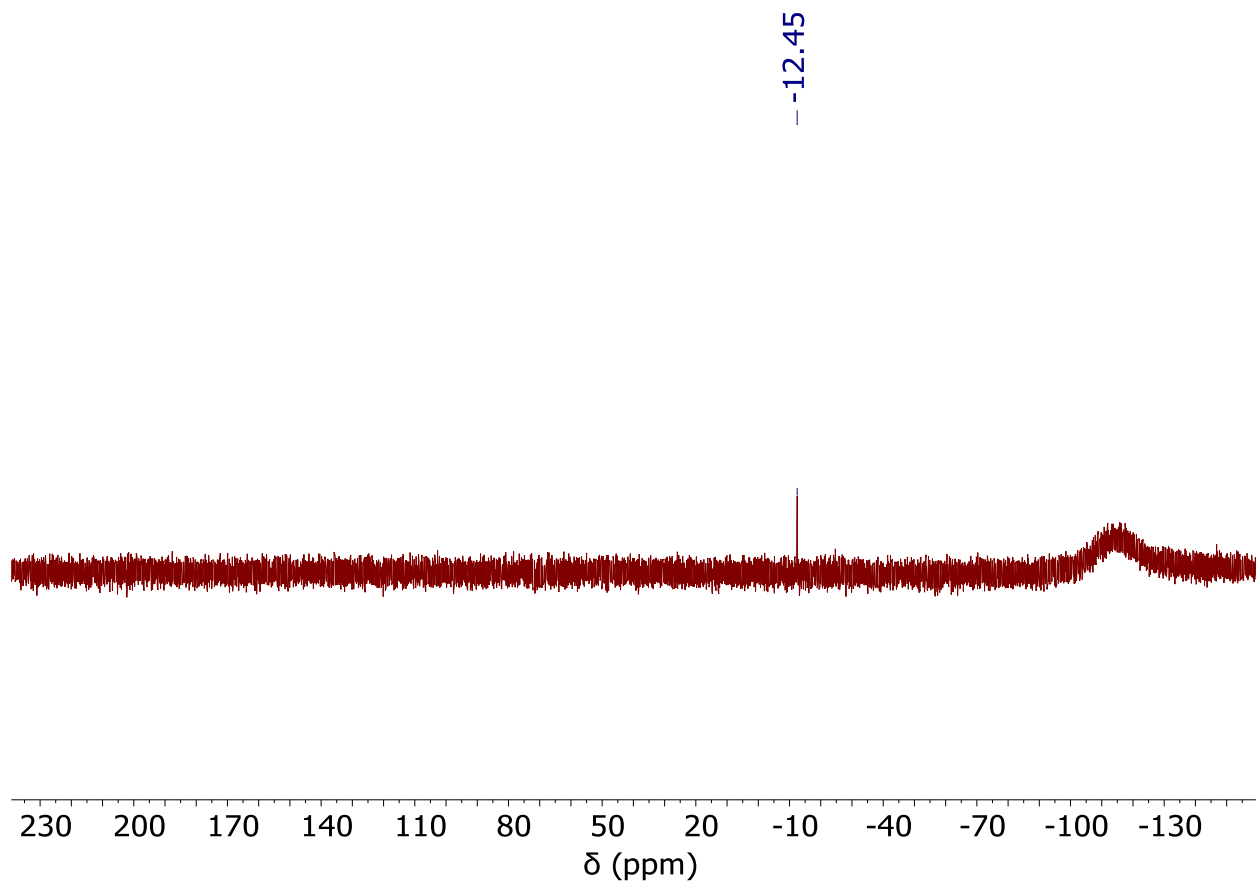

**Figure S5.28.**  $^{29}\text{Si}\{^1\text{H}\}$  NMR spectrum for  $\text{Ph}_3\text{Si}(\text{NEt}_2)$ .

# Spectrum Plot Report

| Name                         | Rack Pos.    | Instrument | Operator                         |
|------------------------------|--------------|------------|----------------------------------|
| Inj. Vol. (ul)               | Plate Pos.   | IPM Status |                                  |
| Data File                    | Method (Acq) | Comment    | Success                          |
| MBR-07-191 pos ESI Agilent.d |              |            | Acq. Time (Local)                |
|                              |              |            | 5/31/2023 1:47:56 PM (UTC-04:00) |

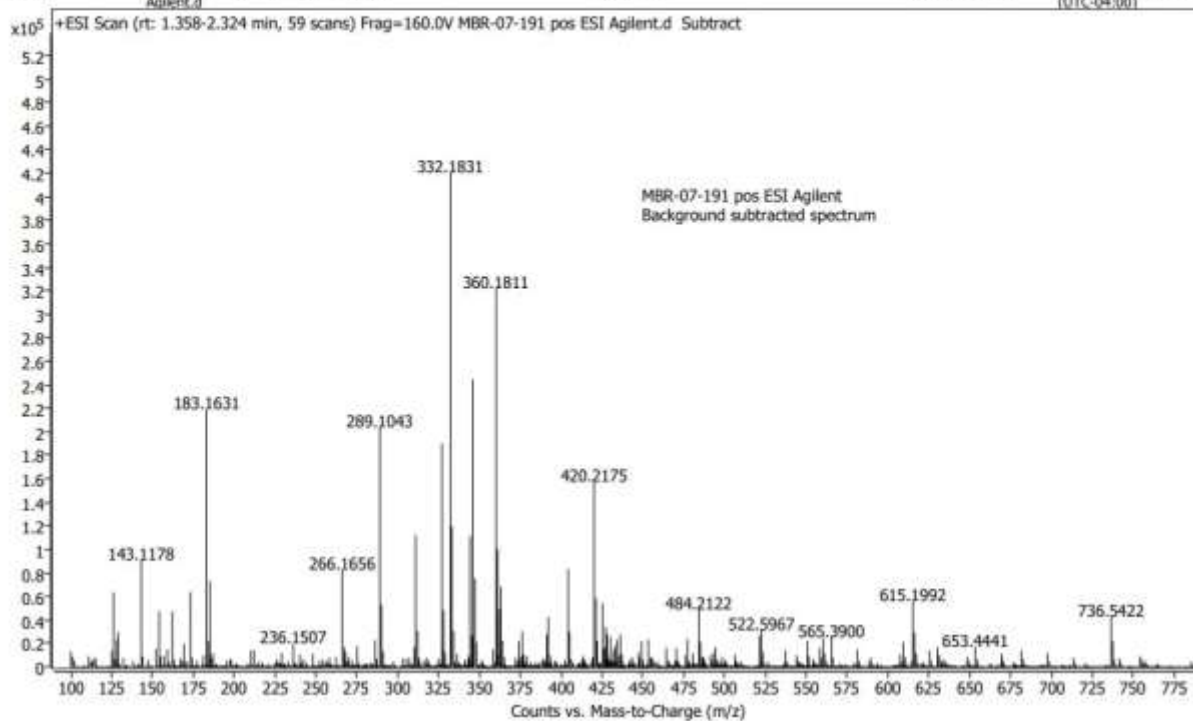

Figure S5.29. Full HRMS fragmentation spectrum for  $[\text{Ph}_3\text{Si}(\text{NEt}_2)+\text{H}]^+$ .

# Spectrum Plot Report

| Name                         | Rack Pos.    | Instrument | Operator                         |
|------------------------------|--------------|------------|----------------------------------|
| Inj. Vol. (ul)               | Plate Pos.   | IRP Status |                                  |
| Data File                    | Method (Acq) | Comment    | Success                          |
| MBR-07-191 pos ESI Agilent.d |              |            | Acq. Time (Local)                |
|                              |              |            | 5/31/2023 1:47:56 PM (UTC-04:00) |

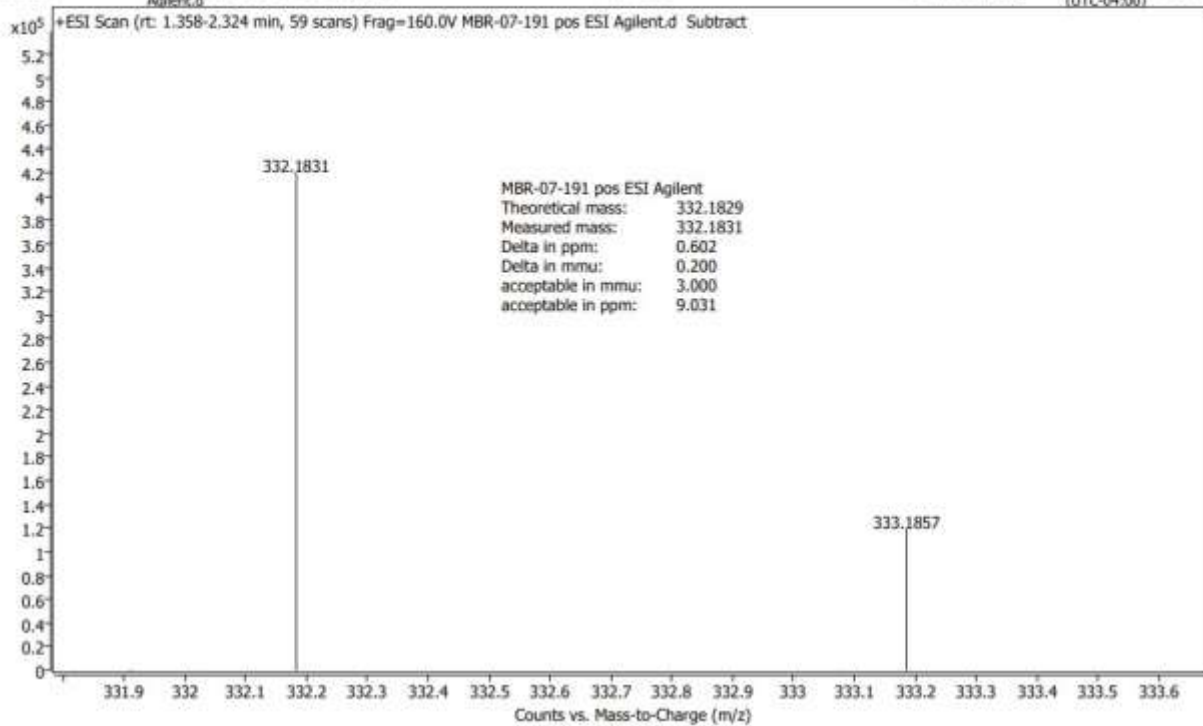

Figure S5.30. Background-subtracted HRMS fragmentation spectrum for  $[\text{Ph}_3\text{Si}(\text{NEt}_2)+\text{H}]^+$ .

## S6. References

1. Bellini, C.; Carpentier, J.-F.; Tobisch, S.; Sarazin, Y. *Angew. Chem. Int. Ed.* **2015**, *54*, 7679-7683.
2. Hansch, C.; Leo, A.; Taft, R. W. *Chem. Rev.* **1991**, *91*, 165-195.
3. Wang, J. X.; Dash, A. K.; Berthet, J. C.; Ephritikhine, M.; Eisen, M. S. *J. Organomet. Chem.* **2000**, *610*, 49-57.
4. Xie, W.; Hu, H.; Cui, C. *Angew. Chem. Int. Ed.* **2012**, *51*, 11141-11144.
5. Anga, S.; Sarazin, Y.; Carpentier, J.-F.; Panda, T. K. *ChemCatChem* **2016**, *8*, 1373-1378.
6. Cibuzar, M. P.; Waterman, R. *Organometallics* **2018**, *37*, 4395-4401.
7. Dunne, J. F.; Neal, S. R.; Engelkemier, J.; Ellern, A.; Sadow, A. D. *J. Am. Chem. Soc.* **2011**, *133*, 16782-16785.
8. Zhang, X.; Zhou, S.; Fang, X.; Zhang, L.; Tao, G.; Wei, Y.; Zhu, X.; Cui, P.; Wang, S. *Inorg. Chem.* **2020**, *59*, 9683-9692.
9. Wrackmeyer, B.; Stader, C.; Zhou, H. *Spectrochim. Acta A: Mol. Biomol. Spectrosc.* **1989**, *45*, 1101-1111.
10. Cosham, S. D.; Johnson, A. L.; Kociok-Köhn, G.; Molloy, K. C. *J. Organomet. Chem.* **2014**, *772-773*, 27-33.
11. Bowser, J. R.; Marohn, K. F.; Gilbert, S. R.; Robbins, A. M. *Synth. React. Inorg. Met. Org. Chem.* **1999**, *29*, 1559-1566.
12. Ojeda-Amador, A. I.; Munarriz, J.; Alamán-Valtierra, P.; Polo, V.; Puerta-Oteo, R.; Jiménez, M. V.; Fernández-Alvarez, F. J.; Pérez-Torrente, J. J. *ChemCatChem* **2019**, *11*, 5524-5535.
13. Leigh, W. J.; Li, X. *J. Phys. Chem. A* **2003**, *107*, 1517-1524.
14. Filleux-Blanchard, M. L.; An, N. D. *Org. Magn. Reson.* **1979**, *12*, 12-16.
15. Xu, M.; Kooij, B.; Wang, T.; Lin, J. H.; Qu, Z.-W.; Grimme, S.; Stephan, D. W. *Angew. Chem. Int. Ed.* **2021**, *60*, 16965-16969.
16. Takaki, K.; Kamata, T.; Miura, Y.; Shishido, T.; Takehira, K. *J. Org. Chem.* **1999**, *64*, 3891-3895.
17. Rina, Y. A.; Schmidt, J. A. R. *Organometallics* **2022**, *41*, 2974-2984.
